# Supplementary material
Source: PubMed Central journal article supplement (PMC3668823)
Supplement: JCI62980sd.pdf [file JCI62980sd.pdf]

**Supplemental Table 1.** microarray gene list

| <b>Gene symbol</b> | <b>Gene name</b>                                                                          | <b>Accession No.</b>          | <b>Fold Change</b> |
|--------------------|-------------------------------------------------------------------------------------------|-------------------------------|--------------------|
| <b>GRAMD1B</b>     | GRAM domain containing 1B                                                                 | <a href="#">NM_020716</a>     | 21.8               |
| CYSLTR2            | cysteinyl leukotriene receptor 2                                                          | <a href="#">NM_020377</a>     | 18.9               |
| TNFRSF10D          | tumor necrosis factor receptor superfamily, member 10d, decoy with truncated death domain | <a href="#">NM_003840</a>     | 15.9               |
| CASP1              | caspase 1, apoptosis-related cysteine peptidase (interleukin 1, beta, convertase)         | <a href="#">NM_001223</a>     | 14.2               |
| <b>BACE2</b>       | beta-site APP-cleaving enzyme 2                                                           | <a href="#">NM_012105</a>     | 13.1               |
| <b>CADPS</b>       | Ca <sup>2+</sup> -dependent secretion activator                                           | <a href="#">NM_003716</a>     | 12.5               |
| <b>UNC13A</b>      | unc-13 homolog A (C. elegans)                                                             | <a href="#">NM_00108042</a>   | 10.6               |
| PPP1R3C            | protein phosphatase 1, regulatory (inhibitor) subunit 3C                                  | <a href="#">NM_005398</a>     | 10.1               |
| CCL18              | chemokine (C-C motif) ligand 18 (pulmonary and activation-regulated)                      | <a href="#">NM_002988</a>     | 10.0               |
| <b>EEA1</b>        | early endosome antigen 1, 162kD                                                           | <a href="#">NM_003566</a>     | 9.2                |
| LYZ                | lysozyme (renal amyloidosis)                                                              | <a href="#">NM_000239</a>     | 8.8                |
| ABCC2              | ATP-binding cassette, sub-family C (CFTR                                                  | <a href="#">NM_000392</a>     | 8.8                |
| RGS1               | regulator of G-protein rystalli 1                                                         | <a href="#">NM_002922</a>     | 8.1                |
| LRAP               | leukocyte-derived arginine aminopeptidase                                                 | <a href="#">NM_022350</a>     | 7.7                |
| MOSC1              | MOCO sulphurase C-terminal domain containing 1                                            | <a href="#">NM_022746</a>     | 7.5                |
| LRRFIP1            | leucine rich repeat (in FLII) interacting protein 1                                       | <a href="#">NM_0010137550</a> | 7.5                |
| <b>FGF12</b>       | fibroblast growth factor 12                                                               | <a href="#">NM_004113</a>     | 7.1                |
| <b>CTSK</b>        | cathepsin K                                                                               | <a href="#">NM_000396</a>     | 6.6                |
| FER1L3             | fer-1-like 3, myoferlin (C. elegans)                                                      | <a href="#">NM_133337</a>     | 6.5                |
| WFDC1              | WAP four-disulfide core domain 1                                                          | <a href="#">NM_021197</a>     | 6.3                |
| <b>PXDN</b>        | peroxidasin homolog (Drosophila)                                                          | <a href="#">NM_012293</a>     | 6.1                |
| GPX7               | glutathione peroxidase 7                                                                  | <a href="#">NM_015696</a>     | 5.8                |
| <b>RGL1</b>        | ral guanine nucleotide dissociation stimulator-like 1                                     | <a href="#">NM_015149</a>     | 5.8                |
| ANKRD30B           | ankyrin repeat domain 30B                                                                 | <a href="#">NM_001029862</a>  | 5.7                |
| PRDM7              | PR domain containing 7                                                                    | <a href="#">NM_052996</a>     | 5.5                |
| ZNF93              | zinc finger protein 93                                                                    | <a href="#">NM_031218</a>     | 5.3                |
| PRKG2              | protein kinase, cGMP-dependent, type II                                                   | <a href="#">NM_006259</a>     | 5.3                |
| ACP5               | acid phosphatase 5, tartrate resistant                                                    | <a href="#">NM_001611</a>     | 5.3                |

| Gene symbol    | Gene name                                                                                  | Accession No.                | Fold Change |
|----------------|--------------------------------------------------------------------------------------------|------------------------------|-------------|
| <b>PDE7B</b>   | phosphodiesterase 7B                                                                       | <a href="#">NM_018945</a>    | 5.3         |
| RNF125*        | ring finger protein 125                                                                    | <a href="#">NM_017831</a>    | 5.2         |
| <b>PCSK1</b>   | proprotein convertase subtilisin                                                           | <a href="#">NM_000439</a>    | 5.2         |
| SESN3          | sestrin 3                                                                                  | <a href="#">NM_144665</a>    | 5.0         |
| TSPAN7         | tetraspanin 7                                                                              | <a href="#">NM_004615</a>    | 5.0         |
| SPATS1         | spermatogenesis associated, serine-rich 1                                                  | <a href="#">NM_145026</a>    | 4.9         |
| TMSB4X         | thymosin, beta 4, X-linked                                                                 | <a href="#">NM_021109</a>    | 4.9         |
| <b>ATRX</b>    | alpha thalassemia                                                                          | <a href="#">NM_000489</a>    | 4.8         |
| <b>NRCAM</b>   | neuronal cell adhesion molecule                                                            | <a href="#">NM_001037132</a> | 4.8         |
| CMBL           | carboxymethylenebutenolidase homolog (Pseudomonas)                                         | <a href="#">NM_138809</a>    | 4.7         |
| <b>GLRX*</b>   | glutaredoxin (thioltransferase)                                                            | <a href="#">NM_002064</a>    | 4.7         |
| <b>GCNT2</b>   | glucosaminyl (N-acetyl) transferase 2, I-branching enzyme (I blood group)                  | <a href="#">NM_145649</a>    | 4.6         |
| <b>MYO5B</b>   | myosin VB                                                                                  | <a href="#">NM_001080467</a> | 4.6         |
| B3GALNT1       | beta-1,3-N-acetylgalactosaminyltransferase 1 (globoside blood group)                       | <a href="#">NM_001038628</a> | 4.6         |
| <b>EIF5B</b>   | eukaryotic translation initiation factor 5B                                                | <a href="#">NM_015904</a>    | 4.5         |
| PTPN20B        | protein tyrosine phosphatase, non-receptor type 20B                                        | <a href="#">NM_001042389</a> | 4.5         |
| ANXA6          | annexin A6                                                                                 | <a href="#">NM_001155</a>    | 4.5         |
| <b>PI15</b>    | peptidase inhibitor 15                                                                     | <a href="#">NM_015886</a>    | 4.4         |
| <b>FAM70A</b>  | family with sequence similarity 70, member A                                               | <a href="#">NM_017938</a>    | 4.3         |
| SLC37A2        | solute carrier family 37 (glycerol-3-phosphate transporter), member 2                      | <a href="#">NM_198277</a>    | 4.3         |
| MX2            | myxovirus (influenza virus) resistance 2 (mouse)                                           | <a href="#">NM_002463</a>    | 4.3         |
| ZNF84          | zinc finger protein 84                                                                     | <a href="#">M61870</a>       | 4.3         |
| <b>WIPF1</b>   | WAS                                                                                        | <a href="#">NM_003387</a>    | 4.3         |
| <b>PRKAR1A</b> | protein kinase, cAMP-dependent, regulatory, type I, alpha (tissue specific extinguisher 1) | <a href="#">NM_212472</a>    | 4.2         |
| <b>MPZ</b>     | myelin protein zero (Charcot-Marie-Tooth neuropathy 1B)                                    | <a href="#">NM_000530</a>    | 4.2         |
| PLA1A          | phospholipase A1 member A                                                                  | <a href="#">NM_015900</a>    | 4.0         |
| FER1L3         | fer-1-like 3, myoferlin (C. elegans)                                                       | <a href="#">NM_133337</a>    | 4.0         |
| <b>MAP1A</b>   | microtubule-associated protein 1A                                                          | <a href="#">NM_002373</a>    | 3.9         |

| Gene symbol    | Gene name                                                                                        | Accession No.                | Fold Change |
|----------------|--------------------------------------------------------------------------------------------------|------------------------------|-------------|
| <b>KIT</b>     | v-kit Hardy-Zuckerman 4 feline sarcoma viral oncogene homolog                                    | <a href="#">NM_000222</a>    | 3.9         |
| MGST1          | microsomal glutathione S-transferase 1                                                           | <a href="#">NM_145792</a>    | 3.9         |
| LAYN           | layilin                                                                                          | <a href="#">NM_178834</a>    | 3.8         |
| AHNAK          | AHNAK nucleoprotein (desmoyokin)                                                                 | <a href="#">NM_024060</a>    | 3.8         |
| <b>RBM25</b>   | RNA binding motif protein 25                                                                     | <a href="#">NM_021239</a>    | 3.8         |
| EXTL1          | exostoses (multiple)-like 1                                                                      | <a href="#">NM_004455</a>    | 3.8         |
| SLC19A3*       | solute carrier family 19, member 3                                                               | <a href="#">NM_025243</a>    | 3.7         |
| KDR            | kinase insert domain receptor (a type III receptor tyrosine kinase)                              | <a href="#">NM_002253</a>    | 3.7         |
| MMP8           | matrix metalloproteinase 8 (neutrophil collagenase)                                              | <a href="#">NM_002424</a>    | 3.7         |
| PKLR           | pyruvate kinase, liver and RBC                                                                   | <a href="#">NM_000298</a>    | 3.7         |
| GOLGB1         | golgi autoantigen, golgin subfamily b, macrogolgin (with transmembrane signal), 1                | <a href="#">NM_004487</a>    | 3.7         |
| CENPF          | centromere protein F, 350                                                                        | <a href="#">NM_016343</a>    | 3.7         |
| EPHB1          | EPH receptor B1                                                                                  | <a href="#">NM_004441</a>    | 3.6         |
| SLC16A4*       | solute carrier family 16, member 4 (monocarboxylic acid transporter 5)                           | <a href="#">NM_004696</a>    | 3.6         |
| HSD17B7        | hydroxysteroid (17-beta) dehydrogenase 7                                                         | <a href="#">NM_016371</a>    | 3.6         |
| IGFBP2         | insulin-like growth factor binding protein 2                                                     | <a href="#">NM_000597</a>    | 3.6         |
| CPS1           | carbamoyl-phosphate synthetase 1, mitochondrial                                                  | <a href="#">NM_001875</a>    | 3.6         |
| KIAA1199       | KIAA1199                                                                                         | <a href="#">NM_018689</a>    | 3.6         |
| <b>GALNT14</b> | UDP-N-acetyl-alpha-D-galactosamine:polypeptide N-acetylgalactosaminyltransferase 14 (GalNAc-T14) | <a href="#">NM_024572</a>    | 3.6         |
| CCDC55         | coiled-coil domain containing 55                                                                 | <a href="#">NM_032141</a>    | 3.6         |
| <b>PRUNE2</b>  | prune homolog 2 (Drosophila)                                                                     | <a href="#">NM_138818</a>    | 3.6         |
| ZNF682         | zinc finger protein 682                                                                          | <a href="#">NM_001077349</a> | 3.5         |
| <b>GALM</b>    | galactose mutarotase (aldose 1-epimerase)                                                        | <a href="#">NM_138801</a>    | 3.5         |
| <b>OLFM1</b>   | olfactomedin 1                                                                                   | <a href="#">NM_014279</a>    | 3.5         |
| KIAA1212       | KIAA1212                                                                                         | <a href="#">NM_018084</a>    | 3.5         |
| PAIP1          | poly(A) binding protein interacting protein 1                                                    | <a href="#">NM_006451</a>    | 3.5         |
| PPIG           | peptidylprolyl isomerase G (cyclophilin G)                                                       | <a href="#">NM_004792</a>    | 3.5         |
| ZNF253         | zinc finger protein 253                                                                          | <a href="#">NM_021047</a>    | 3.4         |
| ZNF724P        | zinc finger protein 724P                                                                         | <a href="#">XM_001132303</a> | 3.4         |

| Gene symbol   | Gene name                                                       | Accession No.                | Fold Change |
|---------------|-----------------------------------------------------------------|------------------------------|-------------|
| CAPG          | capping protein (actin filament), gelsolin-like                 | <a href="#">NM_001747</a>    | 3.4         |
| CST2          | cystatin SA                                                     | <a href="#">NM_001322</a>    | 3.4         |
| ZNF382        | zinc finger protein 382                                         | <a href="#">NM_032825</a>    | 3.4         |
| OR2A20P       | olfactory receptor, family 2, subfamily A, member 20 pseudogene | <a href="#">BC016940</a>     | 3.4         |
| KIAA1914      | KIAA1914                                                        | <a href="#">NM_032550</a>    | 3.4         |
| SPG3A         | spastic paraplegia 3A (autosomal dominant)                      | <a href="#">NM_015915</a>    | 3.3         |
| COP1          | caspase-1 dominant-negative inhibitor pseudo-ICE                | <a href="#">NM_052889</a>    | 3.3         |
| OR7A5         | olfactory receptor, family 7, subfamily A, member 5             | <a href="#">NM_017506</a>    | 3.3         |
| ZNF415        | zinc finger protein 415                                         | <a href="#">NM_018355</a>    | 3.3         |
| SCML1         | sex comb on midleg-like 1 (Drosophila)                          | <a href="#">NM_006746</a>    | 3.3         |
| <b>MKI67</b>  | antigen identified by monoclonal antibody Ki-67                 | <a href="#">NM_002417</a>    | 3.3         |
| <b>MUM1L1</b> | melanoma associated antigen (mutated) 1-like 1                  | <a href="#">NM_152423</a>    | 3.3         |
| <b>ITGB3</b>  | integrin, beta 3 (platelet glycoprotein IIIa, antigen CD61)     | <a href="#">NM_000212</a>    | 3.2         |
| NUCB2         | nucleobindin 2                                                  | <a href="#">NM_005013</a>    | 3.2         |
| <b>HSPB8</b>  | heat shock 22kDa protein 8                                      | <a href="#">NM_014365</a>    | 3.2         |
| ARHGDI3       | Rho GDP dissociation inhibitor (GDI) gamma                      | <a href="#">NM_001176</a>    | 3.2         |
| <b>VAMP8</b>  | vesicle-associated membrane protein 8 (endobrevin)              | <a href="#">NM_003761</a>    | 3.2         |
| ZC3H13        | zinc finger CCCH-type containing 13                             | <a href="#">NM_015070</a>    | 3.2         |
| LUM           | lumican                                                         | <a href="#">NM_002345</a>    | 3.2         |
| TPR           | translocated promoter region (to activated MET oncogene)        | <a href="#">NM_003292</a>    | 3.1         |
| KIAA0367      | KIAA0367                                                        | <a href="#">NM_015225</a>    | 3.1         |
| ASB9          | ankyrin repeat and SOCS box-containing 9                        | <a href="#">NM_024087</a>    | 3.1         |
| <b>CEP170</b> | centrosomal protein 170kDa                                      | <a href="#">NM_001042404</a> | 3.1         |
| <b>PIK3R3</b> | phosphoinositide-3-kinase, regulatory subunit 3 (p55, gamma)    | <a href="#">NM_003629</a>    | 3.1         |
| ZNF257        | zinc finger protein 257                                         | <a href="#">NM_033468</a>    | 3.1         |
| CCDC112       | coiled-coil domain containing 112                               | <a href="#">NM_152549</a>    | 3.1         |
| PLXDC2        | plexin domain containing 2                                      | <a href="#">NM_032812</a>    | 3.1         |
| <b>TIAM1</b>  | T-cell lymphoma invasion and metastasis 1                       | <a href="#">NM_003253</a>    | 3.1         |
| LY6E          | lymphocyte antigen 6 complex, locus E                           | <a href="#">NM_002346</a>    | 3.1         |
| GSTM1         | glutathione S-transferase M1                                    | <a href="#">NM_000561</a>    | 3.1         |

| Gene symbol     | Gene name                                                                                 | Accession No.                | Fold Change |
|-----------------|-------------------------------------------------------------------------------------------|------------------------------|-------------|
| FBLN1*          | fibulin 1                                                                                 | <a href="#">NM_006486</a>    | 3.0         |
| DPP4            | dipeptidyl-peptidase 4 (CD26, adenosine deaminase complexing protein 2)                   | <a href="#">NM_001935</a>    | 3.0         |
| <b>IQGAP2</b>   | IQ motif containing GTPase activating protein 2                                           | <a href="#">NM_006633</a>    | 3.0         |
| EDG7            | endothelial differentiation, lysophosphatidic acid G-protein-coupled receptor, 7          | <a href="#">NM_012152</a>    | 3.0         |
| <b>LDLR</b>     | low density lipoprotein receptor (familial hypercholesterolemia)                          | <a href="#">NM_000527</a>    | 3.0         |
| ZNF605          | zinc finger protein 605                                                                   | <a href="#">NM_183238</a>    | 3.0         |
| RP1-32F7.2      | hypothetical protein FLJ37659                                                             | <a href="#">NM_173698</a>    | 3.0         |
| TNFRSF10A       | tumor necrosis factor receptor superfamily, member 10a                                    | <a href="#">NM_003844</a>    | 3.0         |
| <b>ABCA1</b>    | ATP-binding cassette, sub-family A (ABC1), member 1                                       | <a href="#">NM_005502</a>    | 3.0         |
| <b>TFPI2</b>    | tissue factor pathway inhibitor 2                                                         | <a href="#">NM_006528</a>    | 2.9         |
| <b>L1CAM</b>    | L1 cell adhesion molecule                                                                 | <a href="#">NM_000425</a>    | 2.9         |
| GALNTL4         | UDP-N-acetyl-alpha-D-galactosamine: polypeptide N-acetylgalactosaminyl transferase-like 4 | <a href="#">NM_198516</a>    | 2.9         |
| RNU5D           | RNA, U5D small nuclear                                                                    | <a href="#">NR_002755</a>    | 2.9         |
| <b>KLHL13</b>   | kelch-like 13 (Drosophila)                                                                | <a href="#">NM_033495</a>    | 2.9         |
| SNX10           | sorting nexin 10                                                                          | <a href="#">NM_013322</a>    | 2.9         |
| CENPE           | centromere protein E, 312kDa                                                              | <a href="#">NM_001813</a>    | 2.9         |
| <b>NOX4</b>     | NADPH oxidase 4                                                                           | <a href="#">NM_016931</a>    | 2.9         |
| ZNF626          | zinc finger protein 626                                                                   | <a href="#">NM_145297</a>    | 2.9         |
| ZNF91           | zinc finger protein 91                                                                    | <a href="#">NM_003430</a>    | 2.9         |
| PHLDB2          | pleckstrin homology-like domain, family B, member 2                                       | <a href="#">NM_145753</a>    | 2.9         |
| <b>GULP1</b>    | GULP, engulfment adaptor PTB domain containing 1                                          | <a href="#">NM_016315</a>    | 2.9         |
| MRGPRX4         | MAS-related GPR, member X4                                                                | <a href="#">NM_054032</a>    | 2.8         |
| CEP290          | centrosomal protein 290kDa                                                                | <a href="#">NM_025114</a>    | 2.8         |
| <b>TMPRSS13</b> | transmembrane protease, serine 13                                                         | <a href="#">NM_001077263</a> | 2.8         |
| PTPN20A         | protein tyrosine phosphatase, non-receptor type 20A                                       | <a href="#">NM_001042390</a> | 2.8         |
| ZNF90           | zinc finger protein 90                                                                    | <a href="#">BC038096</a>     | 2.8         |
| ADFP            | adipose differentiation-related protein                                                   | <a href="#">NM_001122</a>    | 2.8         |
| <b>ATP2B4</b>   | ATPase, Ca <sup>++</sup> transporting, plasma membrane 4                                  | <a href="#">NM_001001396</a> | 2.8         |
| S100B           | S100 calcium binding protein B                                                            | <a href="#">NM_006272</a>    | 2.8         |
| LXN             | latexin                                                                                   | <a href="#">NM_020169</a>    | 2.8         |
| NID1            | nidogen 1                                                                                 | <a href="#">NM_002508</a>    | 2.8         |

| Gene symbol     | Gene name                                                                          | Accession No.                | Fold Change |
|-----------------|------------------------------------------------------------------------------------|------------------------------|-------------|
| ALDH1L2         | aldehyde dehydrogenase 1 family, member L2                                         | <a href="#">NM_001034173</a> | 2.8         |
| <b>MAPK4</b>    | mitogen-activated protein kinase 4                                                 | <a href="#">NM_002747</a>    | 2.8         |
| SNRPN*          | small nuclear ribonucleoprotein polypeptide N                                      | <a href="#">NM_003097</a>    | 2.8         |
| HLA-DPB1        | major histocompatibility complex, class II, DP beta 1                              | <a href="#">NM_002121</a>    | 2.8         |
| <b>ABCD1</b>    | ATP-binding cassette, sub-family D (ALD), member 1                                 | <a href="#">NM_000033</a>    | 2.8         |
| <b>FZD6</b>     | frizzled homolog 6 (Drosophila)                                                    | <a href="#">NM_003506</a>    | 2.7         |
| <b>TAOK3</b>    | TAO kinase 3                                                                       | <a href="#">NM_016281</a>    | 2.7         |
| DYNC2H1         | dynein, cytoplasmic 2, heavy chain 1                                               | <a href="#">NM_001377.2</a>  | 2.7         |
| TMEM16D         | transmembrane protein 16D                                                          | <a href="#">NM_178826</a>    | 2.7         |
| ZNF320          | zinc finger protein 320                                                            | <a href="#">NM_207333</a>    | 2.7         |
| <b>AKAP9*</b>   | A kinase (PRKA) anchor protein (yotiao) 9                                          | <a href="#">NM_005751</a>    | 2.7         |
| MOSC2           | MOCO sulphurase C-terminal domain containing 2                                     | <a href="#">NM_017898</a>    | 2.7         |
| <b>BCAT1</b>    | branched chain aminotransferase 1, cytosolic                                       | <a href="#">NM_005504</a>    | 2.7         |
| CTSH            | cathepsin H                                                                        | <a href="#">NM_004390</a>    | 2.7         |
| NFATC2          | nuclear factor of activated T-cells, cytoplasmic, calcineurin-dependent 2          | <a href="#">NM_012340</a>    | 2.7         |
| <b>GCC2</b>     | GRIP and coiled-coil domain containing 2                                           | <a href="#">NM_181453</a>    | 2.7         |
| <b>GOLPH3L</b>  | golgi phosphoprotein 3-like                                                        | <a href="#">NM_018178</a>    | 2.7         |
| <b>KIAA1217</b> | KIAA1217                                                                           | <a href="#">NM_019590</a>    | 2.7         |
| TSPAN13         | tetraspanin 13                                                                     | <a href="#">NM_014399</a>    | 2.6         |
| <b>SLC7A8</b>   | solute carrier family 7 (cationic amino acid transporter, y+ system), member 8     | <a href="#">NM_182728</a>    | 2.6         |
| TMEM171         | transmembrane protein 171                                                          | <a href="#">NM_173490</a>    | 2.6         |
| <b>PTBP2</b>    | polypyrimidine tract binding protein 2                                             | <a href="#">NM_021190</a>    | 2.6         |
| <b>KIF3A</b>    | kinesin family member 3A                                                           | <a href="#">NM_007054</a>    | 2.6         |
| <b>MNS1</b>     | meiosis-specific nuclear structural 1                                              | <a href="#">NM_018365</a>    | 2.6         |
| <b>RAPGEF4</b>  | Rap guanine nucleotide exchange factor (GEF) 4                                     | <a href="#">NM_007023</a>    | 2.6         |
| BDP1            | B double prime 1, subunit of RNA polymerase III transcription initiation factor IB | <a href="#">NM_018429</a>    | 2.6         |
| PDLIM4          | PDZ and LIM domain 4                                                               | <a href="#">NM_003687</a>    | 2.6         |
| <b>VAV2</b>     | vav 2 oncogene                                                                     | <a href="#">NM_003371</a>    | 2.6         |
| ZNF271          | zinc finger protein 271                                                            | <a href="#">NM_006629</a>    | 2.6         |
| CCDC8           | coiled-coil domain containing 8                                                    | <a href="#">NM_032040</a>    | 2.6         |
| <b>RSF1</b>     | remodeling and spacing factor 1                                                    | <a href="#">NM_016578</a>    | 2.6         |

| Gene symbol     | Gene name                                                                                    | Accession No.                | Fold Change |
|-----------------|----------------------------------------------------------------------------------------------|------------------------------|-------------|
| ZNF197          | zinc finger protein 197                                                                      | <a href="#">NM_006991</a>    | 2.6         |
| <b>EPHB4</b>    | EPH receptor B4                                                                              | <a href="#">NM_004444</a>    | 2.6         |
| LY96            | lymphocyte antigen 96                                                                        | <a href="#">NM_015364</a>    | 2.6         |
| <b>KTN1</b>     | kinectin 1 (kinesin receptor)                                                                | <a href="#">NM_182926</a>    | 2.6         |
| MCTP2           | multiple C2 domains,<br>transmembrane 2                                                      | <a href="#">NM_018349</a>    | 2.6         |
| SCARA5          | scavenger receptor class A,<br>member 5 (putative)                                           | <a href="#">NM_173833</a>    | 2.6         |
| STARD4          | START domain containing 4,<br>sterol regulated                                               | <a href="#">NM_139164</a>    | 2.6         |
| LGALS12         | lectin, galactoside-binding,<br>soluble, 12 (galectin 12)                                    | <a href="#">NM_033101</a>    | 2.6         |
| <b>SMARCA1</b>  | SWI                                                                                          | <a href="#">NM_139035</a>    | 2.5         |
| CROP            | cisplatin resistance-associated<br>overexpressed protein                                     | <a href="#">NM_016424</a>    | 2.5         |
| FHL2            | four and a half LIM domains 2                                                                | <a href="#">NM_201557</a>    | 2.5         |
| <b>SGTB</b>     |                                                                                              |                              | 2.5         |
| <b>ARHGAP21</b> | Rho GTPase activating protein<br>21                                                          | <a href="#">NM_020824</a>    | 2.5         |
| CDC42BPA        | AT rich interactive domain 4B<br>(RBP1-like)                                                 | <a href="#">NM_016374</a>    | 2.5         |
| PRO2012         | CDC42 binding protein kinase<br>alpha (DMPK-like)                                            | <a href="#">NM_003607</a>    | 2.5         |
| SOX2            | SRY (sex determining region Y)-<br>box 2                                                     | <a href="#">NM_003106</a>    | 2.5         |
| SRGAP1          | SLIT-ROBO Rho GTPase<br>activating protein 1                                                 | <a href="#">NM_020762</a>    | 2.5         |
| <b>SEMA3B</b>   | sema domain, immunoglobulin<br>domain (Ig), short basic domain,<br>secreted, (rystalline) 3B | <a href="#">NM_001005914</a> | 2.5         |
| ARID4B          | AT rich interactive domain 4B<br>(RBP1-like)                                                 | <a href="#">NM_016374</a>    | 2.5         |
| ZNF66           | zinc finger protein 66                                                                       | <a href="#">XM_001132102</a> | 2.5         |
| ZNF607          | zinc finger protein 607                                                                      | <a href="#">NM_032689</a>    | 2.5         |
| <b>GOLGA4*</b>  | golgi autoantigen, golgin<br>subfamily a, 4                                                  | <a href="#">NM_002078</a>    | 2.5         |
| RIPK5           | receptor interacting protein<br>kinase 5                                                     | <a href="#">NM_199462</a>    | 2.5         |
| <b>TMTC1</b>    | transmembrane and<br>tetratricopeptide repeat<br>containing 1                                | <a href="#">NM_175861</a>    | 2.5         |
| DEPDC6          | DEP domain containing 6                                                                      | <a href="#">NM_022783</a>    | 2.5         |
| ROCK1           | Rho-associated, coiled-coil<br>containing protein kinase 1                                   | <a href="#">NM_005406</a>    | 2.5         |
| SNAI2           | snail homolog 2 (Drosophila)                                                                 | <a href="#">NM_003068</a>    | 2.5         |
| ZNF493          | zinc finger protein 493                                                                      | <a href="#">NM_001076678</a> | 2.5         |
| SQLE            | squalene epoxidase                                                                           | <a href="#">NM_003129</a>    | 2.5         |
| <b>NPAT</b>     | nuclear protein, ataxia-<br>telangiectasia locus                                             | <a href="#">NM_002519</a>    | 2.5         |

| Gene symbol     | Gene name                                                                                              | Accession No.             | Fold Change |
|-----------------|--------------------------------------------------------------------------------------------------------|---------------------------|-------------|
| NLRP3           | NLR family, pyrin domain containing 3                                                                  | <a href="#">NM_004895</a> | 2.4         |
| <b>MTSS1</b>    | metastasis suppressor 1                                                                                | <a href="#">NM_014751</a> | 2.4         |
| <b>TRIB1</b>    | tribbles homolog 1 (Drosophila)                                                                        | <a href="#">NM_025195</a> | 2.4         |
| SERPINF1        | serpin peptidase inhibitor, clade F (alpha-2 antiplasmin, pigment epithelium derived factor), member 1 | <a href="#">NM_002615</a> | 2.4         |
| MAL             | mal, T-cell differentiation protein                                                                    | <a href="#">NM_002371</a> | 2.4         |
| RAD50*          | RAD50 homolog                                                                                          | <a href="#">NM_133482</a> | 2.4         |
| C3AR1           | complement component 3a receptor 1                                                                     | <a href="#">NM_004054</a> | 2.4         |
| ZNF585B         | zinc finger protein 585B                                                                               | <a href="#">NM_152279</a> | 2.4         |
| <b>ARHGAP12</b> | Rho GTPase activating protein 12                                                                       | <a href="#">NM_018287</a> | 2.4         |
| <b>ANKRD26</b>  | ankyrin repeat domain 26                                                                               | <a href="#">NM_014915</a> | 2.4         |
| FAM44A          | family with sequence similarity 44, member A                                                           | <a href="#">NM_148894</a> | 2.4         |
| EMP3            | epithelial membrane protein 3                                                                          | <a href="#">NM_001425</a> | 2.4         |
| <b>ANKRD12</b>  | ankyrin repeat domain 12                                                                               | <a href="#">NM_015208</a> | 2.4         |
| ZFP30*          | zinc finger protein 30 homolog (mouse)                                                                 | <a href="#">NM_014898</a> | 2.4         |
| DOCK10          | dedicator of cytokinesis 10                                                                            | <a href="#">NM_014689</a> | 2.4         |
| ADCY8           | adenylate cyclase 8 (brain)                                                                            | <a href="#">NM_001115</a> | 2.4         |
| SMYD3           | SET and MYND domain containing 3                                                                       | <a href="#">NM_022743</a> | 2.4         |
| CST7            | cystatin F (leukocystatin)                                                                             | <a href="#">NM_003650</a> | 2.4         |
| ZNF208          | zinc finger protein 208                                                                                | <a href="#">AK096236</a>  | 2.4         |
| <b>FXVD6</b>    | FXVD domain containing ion transport regulator 6                                                       | <a href="#">NM_022003</a> | 2.4         |
| <b>SFRS12</b>   | splicing factor, arginine                                                                              | <a href="#">NM_139168</a> | 2.4         |
| DDX10           | DEAD (Asp-Glu-Ala-Asp) box polypeptide 10                                                              | <a href="#">NM_004398</a> | 2.4         |
| OCA2            | oculocutaneous albinism II (pink-eye dilution homolog, mouse)                                          | <a href="#">NM_000275</a> | 2.4         |
| BAT2D1          | BAT2 domain containing 1                                                                               | <a href="#">NM_015172</a> | 2.4         |
| ANTXR2          | anthrax toxin receptor 2                                                                               | <a href="#">NM_058172</a> | 2.4         |
| ZNF480          | zinc finger protein 480                                                                                | <a href="#">BC065503</a>  | 2.4         |
| <b>FNBP1</b>    | rystal binding protein 1                                                                               | <a href="#">NM_015033</a> | 2.4         |
| <b>THOC2</b>    | THO complex 2                                                                                          | <a href="#">NM_020449</a> | 2.4         |
| <b>STK10</b>    | serine                                                                                                 | <a href="#">NM_005990</a> | 2.4         |
| DENND2D         | DENN                                                                                                   | <a href="#">NM_024901</a> | 2.4         |
| HIST2H4A        | histone cluster 2, H4a                                                                                 | <a href="#">NM_003548</a> | 2.4         |
| CASP4           | caspase 4, apoptosis-related cysteine peptidase                                                        | <a href="#">NM_033307</a> | 2.4         |
| <b>NAV3</b>     | neuron navigator 3                                                                                     | <a href="#">NM_014903</a> | 2.4         |
| SELENBP1        | selenium binding protein 1                                                                             | <a href="#">NM_003944</a> | 2.4         |
| PWCR1           | Prader-Willi syndrome chromosome region 1                                                              | <a href="#">NR_003106</a> | 2.4         |



| <b>Gene symbol</b> | <b>Gene name</b>                                                                                | <b>Accession No.</b>         | <b>Fold Change</b> |
|--------------------|-------------------------------------------------------------------------------------------------|------------------------------|--------------------|
| TTC3               | tetratricopeptide repeat domain 3                                                               | <a href="#">NM_001001894</a> | 2.4                |
| TMEM45A            | transmembrane protein 45A                                                                       | <a href="#">NM_018004</a>    | 2.4                |
| HTATIP2            | HIV-1 Tat interactive protein 2, 30kDa                                                          | <a href="#">NM_006410</a>    | 2.4                |
| QPRT*              | quinolinate phosphoribosyltransferase (nicotinate-nucleotide pyrophosphorylase (carboxylating)) | <a href="#">NM_014298</a>    | 2.4                |
| <b>PREX1</b>       | phosphatidylinositol 3,4,5-trisphosphate-dependent RAC exchanger 1                              | <a href="#">NM_020820</a>    | 2.4                |
| NOV                | nephroblastoma overexpressed gene                                                               | <a href="#">NM_002514</a>    | 2.4                |
| <b>KIF5B</b>       | kinesin family member 5B                                                                        | <a href="#">NM_004521</a>    | 2.4                |
| F2R                | coagulation factor II (thrombin) receptor                                                       | <a href="#">NM_001992</a>    | 2.4                |
| <b>PCF11</b>       | PCF11, cleavage and polyadenylation factor subunit, homolog (S. cerevisiae)                     | <a href="#">NM_015885</a>    | 2.3                |
| DMN                | desmuslin                                                                                       | <a href="#">NM_145728</a>    | 2.3                |
| LPXN               | leupaxin                                                                                        | <a href="#">NM_004811</a>    | 2.3                |
| <b>SETBP1</b>      | SET binding protein 1                                                                           | <a href="#">NM_015559</a>    | 2.3                |
| <b>NTS</b>         | neurotensin                                                                                     | <a href="#">NM_006183</a>    | 2.3                |
| <b>DENND2C</b>     | DENN                                                                                            | <a href="#">NM_198459</a>    | 2.3                |
| PDE3A              | phosphodiesterase 3A, cGMP-inhibited                                                            | <a href="#">NM_000921</a>    | 2.3                |
| LAMB3              | laminin, beta 3                                                                                 | <a href="#">NM_000228</a>    | 2.3                |
| <b>AMOT</b>        | angiominin                                                                                      | <a href="#">NM_133265</a>    | 2.3                |
| TRMT12             | tRNA methyltransferase 12 homolog (S. cerevisiae)                                               | <a href="#">NM_017956</a>    | 2.3                |
| CART1              | cartilage paired-class homeoprotein 1                                                           | <a href="#">NM_006982</a>    | 2.3                |
| RSN                | restin (Reed-Steinberg cell-expressed intermediate filament-associated protein)                 | <a href="#">NM_198240</a>    | 2.3                |
| <b>IGF2BP1</b>     | insulin-like growth factor 2 mRNA binding protein 1                                             | <a href="#">NM_006546</a>    | 2.3                |
| <b>HBEGF</b>       | heparin-binding EGF-like growth factor                                                          | <a href="#">NM_001945</a>    | 2.3                |
| PDE3B              | phosphodiesterase 3B, cGMP-inhibited                                                            | <a href="#">NM_000922</a>    | 2.3                |
| CPNE8              | copine VIII                                                                                     | <a href="#">NM_153634</a>    | 2.3                |
| ZNF483             | zinc finger protein 383                                                                         | <a href="#">NM_133464</a>    | 2.3                |
| <b>MLH3</b>        | mutL homolog 3 (E. coli)                                                                        | <a href="#">NM_001040108</a> | 2.3                |
| MBP                | myelin basic protein                                                                            | <a href="#">NM_001025101</a> | 2.3                |
| FAM19A5            | family with sequence similarity 19 (chemokine (C-C motif)-like), member A5                      | <a href="#">NM_015381</a>    | 2.3                |

| Gene symbol    | Gene name                                                                 | Accession No.                | Fold Change |
|----------------|---------------------------------------------------------------------------|------------------------------|-------------|
| RAB4B          | RAB4B, member RAS oncogene family                                         | <a href="#">NM_016154</a>    | 2.3         |
| NAIP           | NLR family, apoptosis inhibitory protein                                  | <a href="#">NM_004536</a>    | 2.3         |
| AS3MT          | arsenic (+3 oxidation state) methyltransferase                            | <a href="#">NM_020682</a>    | 2.3         |
| NUPR1          | nuclear protein 1                                                         | <a href="#">NM_001042483</a> | 2.3         |
| <b>TSPAN9</b>  | tetraspanin 9                                                             | <a href="#">NM_006675</a>    | 2.3         |
| <b>SH3TC2</b>  | SH3 domain and tetratricopeptide repeats 2                                | <a href="#">NM_024577</a>    | 2.3         |
| CD74           | CD74 molecule, major histocompatibility complex, class II invariant chain | <a href="#">NM_001025159</a> | 2.3         |
| <b>UPF3B</b>   | UPF3 regulator of nonsense transcripts homolog B (yeast)                  | <a href="#">NM_080632</a>    | 2.3         |
| <b>MPP1</b>    | membrane protein, palmitoylated 1, 55kDa                                  | <a href="#">NM_002436</a>    | 2.3         |
| <b>DNAJA4</b>  | DnaJ (Hsp40) homolog, subfamily A, member 4                               | <a href="#">NM_018602</a>    | 2.3         |
| <b>ADCYAP1</b> | adenylate cyclase activating polypeptide 1 (pituitary)                    | <a href="#">NM_001117</a>    | 2.3         |
| <b>CLDN1</b>   | claudin 1                                                                 | <a href="#">NM_021101</a>    | 2.3         |
| HRSP12         | heat-responsive protein 12                                                | <a href="#">NM_005836</a>    | 2.3         |
| <b>PRPF38B</b> | PRP38 pre-mRNA processing factor 38 (yeast) domain containing B           | <a href="#">NM_018061</a>    | 2.3         |
| <b>ROCK2</b>   | Rho-associated, coiled-coil containing protein kinase 2                   | <a href="#">NM_004850</a>    | 2.2         |
| ZRF1           | zuotin related factor 1                                                   | <a href="#">NM_014377</a>    | 2.2         |
| GPRIN3         | GPRIN family member 3                                                     | <a href="#">NM_198281</a>    | 2.2         |
| NSBP1          | nucleosomal binding protein 1                                             | <a href="#">NM_030763</a>    | 2.2         |
| <b>ZHX1*</b>   | zinc fingers and homeoboxes 1                                             | <a href="#">NM_001017926</a> | 2.2         |
| <b>CEP350</b>  | centrosomal protein 350kDa                                                | <a href="#">NM_014810</a>    | 2.2         |
| DDX26B         | DEAD                                                                      | <a href="#">NM_182540</a>    | 2.2         |
| <b>GDF11</b>   | growth differentiation factor 11                                          | <a href="#">NM_005811</a>    | 2.2         |
| KIAA1166       | KIAA1166                                                                  | <a href="#">NM_018684</a>    | 2.2         |
| IKIP           | IKK interacting protein                                                   | <a href="#">NM_153687</a>    | 2.2         |
| TCN1           | transcobalamin I (vitamin B12 binding protein, R binder family)           | <a href="#">NM_001062</a>    | 2.2         |
| HMCN1          | hemicentin 1                                                              | <a href="#">NM_031935</a>    | 2.2         |
| NSDHL          | NAD(P) dependent steroid dehydrogenase-like                               | <a href="#">NM_015922</a>    | 2.2         |
| PAX6           | paired box gene 6 (aniridia, keratitis)                                   | <a href="#">NM_001604</a>    | 2.2         |
| <b>CPM*</b>    | carboxypeptidase M                                                        | <a href="#">NM_001005502</a> | 2.2         |
| CKMT1A         | creatine kinase, mitochondrial 1A                                         | <a href="#">NM_001015001</a> | 2.2         |
| CKMT1B         | creatine kinase, mitochondrial 1B                                         | <a href="#">NM_020990</a>    | 2.2         |
| ARMCX1         | armadillo repeat containing, X-linked 1                                   | <a href="#">NM_016608</a>    | 2.2         |

| <b>Gene symbol</b> | <b>Gene name</b>                                                 | <b>Accession No.</b>         | <b>Fold Change</b> |
|--------------------|------------------------------------------------------------------|------------------------------|--------------------|
| ZNF625             | zinc finger protein 625                                          | <a href="#">NM_145233</a>    | 2.2                |
| HMGCR              | 3-hydroxy-3-methylglutaryl-Coenzyme A reductase                  | <a href="#">NM_000859</a>    | 2.2                |
| MAGED2             | melanoma antigen family D, 2                                     | <a href="#">NM_177433</a>    | 2.2                |
| RAB39              | RAB39, member RAS oncogene family                                | <a href="#">NM_017516</a>    | 2.2                |
| <b>ENC1</b>        | ectodermal-neural cortex (with BTB-like domain)                  | <a href="#">NM_003633</a>    | 2.2                |
| IRF4               | interferon regulatory factor 4                                   | <a href="#">NM_002460</a>    | 2.2                |
| <b>MYO5A*</b>      | myosin VA (heavy chain 12, myosin)                               | <a href="#">NM_000259</a>    | 2.2                |
| MLSTD1             | male sterility domain containing 1                               | <a href="#">NM_018099</a>    | 2.2                |
| <b>ATP11C</b>      | ATPase, Class VI, type 11C                                       | <a href="#">NM_173694</a>    | 2.2                |
| SPATS2*            | spermatogenesis associated, serine-rich 2                        | <a href="#">NM_023071</a>    | 2.2                |
| <b>EPHA4</b>       | EPH receptor A4                                                  | <a href="#">NM_004438</a>    | 2.2                |
| IDI1               | isopentenyl-diphosphate delta isomerase 1                        | <a href="#">NM_004508</a>    | 2.2                |
| <b>FGD1</b>        | FYVE, RhoGEF and PH domain containing 1 (faciogenital dysplasia) | <a href="#">NM_004463</a>    | 2.2                |
| FOXP1B             | forkhead box G1B                                                 | <a href="#">NM_005249</a>    | 2.2                |
| <b>ACBD3</b>       | acyl-Coenzyme A binding domain containing 3                      | <a href="#">NM_022735</a>    | 2.2                |
| <b>ZNF37A</b>      | zinc finger protein 37A                                          | <a href="#">NM_003421</a>    | 2.1                |
| SERINC5            | serine incorporator 5                                            | <a href="#">BC101282</a>     | 2.1                |
| <b>UACA</b>        | uveal autoantigen with coiled-coil domains and ankyrin repeats   | <a href="#">NM_001008224</a> | 2.1                |
| CETN2              | centrin, EF-hand protein, 2                                      | <a href="#">NM_004344</a>    | 2.1                |
| KIF14              | kinesin family member 14                                         | <a href="#">NM_014875</a>    | 2.1                |
| TNRC15             | trinucleotide repeat containing 15                               | <a href="#">NM_015575</a>    | 2.1                |
| SEZ6L2             | SEZ6L2                                                           | <a href="#">NM_012410</a>    | 2.1                |
| <b>RAB18</b>       | RAB18, member RAS oncogene family                                | <a href="#">NM_021252</a>    | 2.1                |
| TMEM22             | transmembrane protein 22                                         | <a href="#">NM_025246</a>    | 2.1                |
| <b>NCAM1</b>       | neural cell adhesion molecule 1                                  | <a href="#">NM_001076682</a> | 2.1                |
| SIAE               | sialic acid acetyltransferase                                    | <a href="#">NM_170601</a>    | 2.1                |
| INDO               | indoleamine-pyrrole 2,3 dioxygenase                              | <a href="#">NM_002164</a>    | 2.1                |
| STK32A             | serine                                                           | <a href="#">NM_145001</a>    | 2.1                |
| CTLA4              | cytotoxic T-lymphocyte-associated protein 4                      | <a href="#">NM_005214</a>    | 2.1                |
| GPRASP2            | G protein-coupled receptor associated sorting protein 2          | <a href="#">NM_001004051</a> | 2.1                |
| PRKCZ              | protein kinase C, zeta                                           | <a href="#">NM_002744</a>    | 2.1                |
| FAH                | fumarylacetoacetate hydrolase (fumarylacetoacetase)              | <a href="#">NM_000137</a>    | 2.1                |
| ARG2               | arginase, type II                                                | <a href="#">NM_001172</a>    | 2.1                |

| Gene symbol     | Gene name                                                                            | Accession No.                | Fold Change |
|-----------------|--------------------------------------------------------------------------------------|------------------------------|-------------|
| <b>BAZ2B*</b>   | bromodomain adjacent to zinc finger domain, 2B                                       | <a href="#">NM_013450</a>    | 2.1         |
| CA5B*           | carbonic anhydrase VB, mitochondrial                                                 | <a href="#">NM_007220</a>    | 2.1         |
| <b>PARVA*</b>   | parvin, alpha                                                                        | <a href="#">NM_018222</a>    | 2.1         |
| SLC35F2         | solute carrier family 35, member F2                                                  | <a href="#">NM_017515</a>    | 2.1         |
| DTWD2           | DTW domain containing 2                                                              | <a href="#">NM_173666</a>    | 2.1         |
| TRAF5           | TNF receptor-associated factor 5                                                     | <a href="#">NM_145759</a>    | 2.1         |
| SERF1A*         | small EDRK-rich factor 1A (telomeric)                                                | <a href="#">NM_021967</a>    | 2.1         |
| SERF1B*         | small EDRK-rich factor 1B (centromeric)                                              | <a href="#">NM_022978</a>    | 2.1         |
| CCBE1           | collagen and calcium binding EGF domains 1                                           | <a href="#">NM_133459</a>    | 2.1         |
| <b>PPP1R12A</b> | protein phosphatase 1, regulatory (inhibitor) subunit 12A                            | <a href="#">NM_002480</a>    | 2.1         |
| <b>CAST</b>     | calpastatin                                                                          | <a href="#">NM_001042441</a> | 2.1         |
| TM4SF18         | transmembrane 4 L six family member 18                                               | <a href="#">NM_138786</a>    | 2.1         |
| <b>CD44</b>     | CD44 molecule (Indian blood group)                                                   | <a href="#">NM_000610</a>    | 2.1         |
| CCDC46          | coiled-coil domain containing 46                                                     | <a href="#">NM_001037325</a> | 2.1         |
| <b>MPHOSPH9</b> | M-phase phosphoprotein 9                                                             | <a href="#">NM_022782</a>    | 2.1         |
| <b>MAP1B</b>    | microtubule-associated protein 1B                                                    | <a href="#">NM_005909</a>    | 2.1         |
| MAGED1*         | melanoma antigen family D, 1                                                         | <a href="#">NM_001005332</a> | 2.1         |
| <b>PCSK2</b>    | proprotein convertase subtilisin                                                     | <a href="#">NM_002594</a>    | 2.1         |
| ST8SIA1         | ST8 alpha-N-acetyl-neuraminide alpha-2,8-sialyltransferase 1                         | <a href="#">NM_003034</a>    | 2.1         |
| PDE4B           | phosphodiesterase 4B, cAMP-specific (phosphodiesterase E4 dunce homolog, Drosophila) | <a href="#">NM_002600</a>    | 2.1         |
| PIGN            | phosphatidylinositol glycan anchor biosynthesis, class N                             | <a href="#">NM_176787</a>    | 2.1         |
| CSTB            | cystatin B (stefin B)                                                                | <a href="#">NM_000100</a>    | 2.1         |
| <b>KCTD21</b>   | potassium channel tetramerisation domain containing 21                               | <a href="#">NM_001029859</a> | 2.1         |
| ATP6V0D2        | ATPase, H <sup>+</sup> transporting, lysosomal 38kDa, V0 subunit d2                  | <a href="#">NM_152565</a>    | 2.1         |
| <b>TTC13*</b>   | tetratricopeptide repeat domain 13                                                   | <a href="#">NM_024525</a>    | 2.1         |
| <b>ACBD5</b>    | acyl-Coenzyme A binding domain containing 5                                          | <a href="#">NM_145698</a>    | 2.1         |
| PDSS1           | prenyl (decaprenyl) diphosphate synthase, subunit 1                                  | <a href="#">NM_014317</a>    | 2.1         |
| DLGAP1          | discs, large (Drosophila) homolog-associated protein 1                               | <a href="#">NM_004746</a>    | 2.1         |

| Gene symbol    | Gene name                                                                                             | Accession No.                | Fold Change |
|----------------|-------------------------------------------------------------------------------------------------------|------------------------------|-------------|
| PARP15         | poly (ADP-ribose) polymerase family, member 15                                                        | <a href="#">NM_152615</a>    | 2.1         |
| CCDC131        | coiled-coil domain containing 131                                                                     | <a href="#">NM_144982</a>    | 2.1         |
| <b>ANKRD50</b> | ankyrin repeat domain 50                                                                              | <a href="#">NM_020337</a>    | 2.1         |
| <b>FRMD4B</b>  | FERM domain containing 4B                                                                             | <a href="#">NM_015123.1</a>  | 2.1         |
| <b>GNAL</b>    | guanine nucleotide binding protein (G protein), alpha activating activity polypeptide, olfactory type | <a href="#">NM_182978</a>    | 2.1         |
| ANXA1          | annexin A1                                                                                            | <a href="#">NM_000700</a>    | 2.1         |
| <b>DUSP10</b>  | dual specificity phosphatase 10                                                                       | <a href="#">NM_007207</a>    | 2.1         |
| <b>CUL2</b>    | cullin 2                                                                                              | <a href="#">NM_003591</a>    | 2.0         |
| HSD17B14       | hydroxysteroid (17-beta) dehydrogenase 14                                                             | <a href="#">NM_016246</a>    | 2.0         |
| ATG4A          | ATG4 autophagy related 4 homolog A (S. cerevisiae)                                                    | <a href="#">NM_178271</a>    | 2.0         |
| <b>MGLL</b>    | monoglyceride lipase                                                                                  | <a href="#">NM_001003794</a> | 2.0         |
| <b>HOXB13</b>  | homeobox B13                                                                                          | <a href="#">NM_006361</a>    | 2.0         |
| PRCP           | prolylcarboxypeptidase (angiotensinase C)                                                             | <a href="#">NM_199418</a>    | 2.0         |
| <b>MDFI</b>    | MyoD family inhibitor                                                                                 | <a href="#">NM_005586</a>    | 2.0         |
| HSPC048        | HSPC048 protein                                                                                       | <a href="#">NM_024725.3</a>  | 2.0         |
| IGFBP7         | insulin-like growth factor binding protein 7                                                          | <a href="#">NM_001553</a>    | 2.0         |
| ZNF84          | zinc finger protein 84                                                                                | <a href="#">NM_003428</a>    | 2.0         |
| VEZT           | vezatin, adherens junctions transmembrane protein                                                     | <a href="#">NM_017599</a>    | 2.0         |
| PECR*          | peroxisomal trans-2-enoyl-CoA reductase                                                               | <a href="#">NM_018441</a>    | 2.0         |
| ZNF721         | zinc finger protein 721                                                                               | <a href="#">NM_133474</a>    | 2.0         |
| PITRM1         | pitrilysin metalloproteinase 1                                                                        | <a href="#">NM_014889</a>    | 2.0         |
| FABP5          | fatty acid binding protein 5 (psoriasis-associated)                                                   | <a href="#">NM_001444</a>    | 2.0         |
| CSS3           | chondroitin sulfate synthase 3                                                                        | <a href="#">NM_175856</a>    | 2.0         |
| ESCO1          | establishment of cohesion 1 homolog 1 (S. cerevisiae)                                                 | <a href="#">NM_052911</a>    | 2.0         |
| RBM41          | RNA binding motif protein 41                                                                          | <a href="#">NM_018301</a>    | 2.0         |
| TRPV4          | transient receptor potential cation channel, subfamily V, member 4                                    | <a href="#">NM_021625</a>    | 2.0         |
| <b>DKK3</b>    | dickkopf homolog 3 (Xenopus laevis)                                                                   | <a href="#">NM_015881</a>    | 2.0         |
| SLK            | STE20-like kinase (yeast)                                                                             | <a href="#">NM_014720</a>    | 2.0         |
| ZNF493         | zinc finger protein 493                                                                               | <a href="#">NM_001076678</a> | 2.0         |
| IL12RB2        | interleukin 12 receptor, beta 2                                                                       | <a href="#">NM_001559</a>    | 2.0         |
| MAMDC1         | MAM domain containing 1                                                                               | <a href="#">NM_182830</a>    | 2.0         |
| ZNF483         | zinc finger protein 483                                                                               | <a href="#">NM_133464</a>    | 2.0         |
| TP53INP1       | tumor protein p53 inducible nuclear protein 1                                                         | <a href="#">NM_033285</a>    | 2.0         |

| Gene symbol     | Gene name                                                                             | Accession No.             | Fold Change |
|-----------------|---------------------------------------------------------------------------------------|---------------------------|-------------|
| <b>ITSN1</b>    | intersectin 1 (SH3 domain protein)                                                    | <a href="#">NM_003024</a> | 2.0         |
| MIPOL1          | mirror-image polydactyly 1                                                            | <a href="#">NM_138731</a> | 2.0         |
| ZNF266*         | zinc finger protein 266                                                               | <a href="#">NM_006631</a> | 2.0         |
| <b>GPR158</b>   | G protein-coupled receptor 158                                                        | <a href="#">NM_020752</a> | 2.0         |
| ZNF486          | zinc finger protein 486                                                               | <a href="#">XM_371152</a> | 2.0         |
| LRRC33          | leucine rich repeat containing 33                                                     | <a href="#">NM_198565</a> | 2.0         |
| <b>NRIP1</b>    | nuclear receptor interacting protein 1                                                | <a href="#">NM_003489</a> | 2.0         |
| CARD8*          | caspase recruitment domain family, member 8                                           | <a href="#">NM_014959</a> | 2.0         |
| <b>ATP6V1C1</b> | ATPase, H <sup>+</sup> transporting, lysosomal 42kDa, V1 subunit C1                   | <a href="#">NM_001695</a> | 2.0         |
| ZNF426          | zinc finger protein 426                                                               | <a href="#">NM_024106</a> | 2.0         |
| ZNF438          | zinc finger protein 438                                                               | <a href="#">NM_182755</a> | 2.0         |
| <b>MLLT11</b>   | myeloid                                                                               | <a href="#">NM_006818</a> | 2.0         |
| <b>LIMA1</b>    | LIM domain and actin binding 1                                                        | <a href="#">NM_016357</a> | 2.0         |
| <b>EPB41L3</b>  | erythrocyte membrane protein band 4.1-like 3                                          | <a href="#">NM_012307</a> | 2.0         |
| SCG3            | secretogranin III                                                                     | <a href="#">NM_013243</a> | 2.0         |
| PNPLA4          | patatin-like phospholipase domain containing 4                                        | <a href="#">NM_004650</a> | 2.0         |
| <b>GPR155*</b>  | G protein-coupled receptor 155                                                        | <a href="#">NM_152529</a> | 2           |
| GLA             | galactosidase, alpha                                                                  | <a href="#">NM_000169</a> | 2.0         |
| LGALS1          | lectin, galactoside-binding, soluble, 1 (galectin 1)                                  | <a href="#">NM_002305</a> | 2.0         |
| S100A10         | S100 calcium binding protein A10                                                      | <a href="#">NM_002966</a> | 2.0         |
| CACNA2D1        | calcium channel, voltage-dependent, alpha 2                                           | <a href="#">NM_000722</a> | 0.5         |
| MT1X            | metallothionein 1X                                                                    | <a href="#">NM_005952</a> | 0.5         |
| MTERFD3         | MTERF domain containing 3                                                             | <a href="#">NM_025198</a> | 0.5         |
| PFKFB4          | 6-phosphofructo-2-kinase                                                              | <a href="#">NM_004567</a> | 0.5         |
| PDLIM3          | PDZ and LIM domain 3                                                                  | <a href="#">NM_014476</a> | 0.5         |
| BDH1            | 3-hydroxybutyrate dehydrogenase, type 1                                               | <a href="#">NM_203314</a> | 0.5         |
| RFC2            | replication factor C (activator 1) 2, 40kDa                                           | <a href="#">NM_181471</a> | 0.5         |
| HIST2H3D        | G protein-coupled receptor, family C, group 5, member A                               | <a href="#">NM_003979</a> | 0.5         |
| GPRC5A          | G protein-coupled receptor, family C, group 5, member A                               | <a href="#">NM_003979</a> | 0.5         |
| <b>RCBTB1</b>   | regulator of chromosome condensation (RCC1) and BTB (POZ) domain containing protein 1 | <a href="#">NM_018191</a> | 0.5         |
| LONRF1          | LON peptidase N-terminal domain and ring finger 1                                     | <a href="#">NM_152271</a> | 0.5         |

| Gene symbol   | Gene name                                                                              | Accession No.               | Fold Change |
|---------------|----------------------------------------------------------------------------------------|-----------------------------|-------------|
| DPYD          | dihydropyrimidine dehydrogenase                                                        | <a href="#">NM_000110</a>   | 0.5         |
| COCH          | coagulation factor C homolog, cochlin (Limulus polyphemus)                             | <a href="#">NM_004086</a>   | 0.5         |
| HIST1H3I      | histone cluster 1, H3i                                                                 | <a href="#">NM_003533</a>   | 0.5         |
| ULK4          | unc-51-like kinase 4 (C. elegans)                                                      | <a href="#">BC014794</a>    | 0.5         |
| PFKFB4        | 6-phosphofructo-2-kinase                                                               | <a href="#">NM_004567</a>   | 0.5         |
| PLAT          | plasminogen activator, tissue                                                          | <a href="#">NM_000931</a>   | 0.5         |
| MND1          | meiotic nuclear divisions 1 homolog (S. cerevisiae)                                    | <a href="#">NM_032117</a>   | 0.5         |
| ASCC3         | activating signal cointegrator 1 complex subunit 3                                     | <a href="#">NM_006828</a>   | 0.5         |
| <b>NLGN1</b>  | neuroligin 1                                                                           | <a href="#">NM_014932</a>   | 0.5         |
| SRD5A2L       | steroid 5 alpha-reductase 2-like                                                       | <a href="#">NM_024592</a>   | 0.5         |
| MBD3          | methyl-CpG binding domain protein 3                                                    | <a href="#">NM_003926</a>   | 0.5         |
| CDC45L        | CDC45 cell division cycle 45-like (S. cerevisiae)                                      | <a href="#">NM_003504</a>   | 0.5         |
| <b>PALLD</b>  | rystal, cytoskeletal associated protein                                                | <a href="#">NM_016081</a>   | 0.5         |
| HIST1H4B      | histone cluster 1, H4b                                                                 | <a href="#">NM_003544</a>   | 0.5         |
| MT1A          |                                                                                        |                             | 0.5         |
| <b>SEMA3C</b> | sema domain, immunoglobulin domain (Ig), short basic domain, secreted, (rystalline) 3C | <a href="#">NM_006379</a>   | 0.5         |
| SGCE          | sarcoglycan, epsilon                                                                   | <a href="#">NM_003919</a>   | 0.5         |
| GAL           | galanin                                                                                | <a href="#">NM_015973</a>   | 0.5         |
| CDT1          | chromatin licensing and DNA replication factor 1                                       | <a href="#">NM_030928</a>   | 0.5         |
| TYR           | tyrosinase (oculocutaneous albinism IA)                                                | <a href="#">NM_000372.4</a> | 0.5         |
| MT2A          | metallothionein 2A                                                                     | <a href="#">NM_005953</a>   | 0.5         |
| TLR6          | toll-like receptor 6                                                                   | <a href="#">NM_006068</a>   | 0.5         |
| <b>IGSF9B</b> | immunoglobulin superfamily, member 9B                                                  | <a href="#">NM_014987.1</a> | 0.5         |
| HERC6         | hect domain and RLD 6                                                                  | <a href="#">NM_017912</a>   | 0.5         |
| GSTZ1         | glutathione transferase zeta 1 (maleylacetoacetate isomerase)                          | <a href="#">NM_145870</a>   | 0.5         |
| AZGP1         | alpha-2-glycoprotein 1, zinc-binding                                                   | <a href="#">NM_001185</a>   | 0.5         |
| BTBD2         | BTB (POZ) domain containing 2                                                          | <a href="#">NM_017797</a>   | 0.5         |
| TMTC4         | transmembrane and tetratricopeptide repeat containing 4                                | <a href="#">NM_032813</a>   | 0.5         |
| <b>KLHL24</b> | kelch-like 24 (Drosophila)                                                             | <a href="#">NM_017644</a>   | 0.5         |
| <b>POLE4</b>  | polymerase (DNA-directed), epsilon 4 (p12 subunit)                                     | <a href="#">NM_019896</a>   | 0.5         |
| <b>NR4A2</b>  | nuclear receptor subfamily 4, group A, member 2                                        | <a href="#">NM_173173</a>   | 0.5         |

| Gene symbol     | Gene name                                                                                      | Accession No.                | Fold Change |
|-----------------|------------------------------------------------------------------------------------------------|------------------------------|-------------|
| TRIM4           | tripartite motif-containing 4                                                                  | <a href="#">NM_033017</a>    | 0.5         |
| <b>BCL2L11</b>  | BCL2-like 11 (apoptosis facilitator)                                                           | <a href="#">NM_138621</a>    | 0.5         |
| <b>TNFRSF21</b> | tumor necrosis factor receptor superfamily, member 21                                          | <a href="#">NM_014452</a>    | 0.5         |
| TRMT11          | tRNA methyltransferase 11 homolog ( <i>S. cerevisiae</i> )                                     | <a href="#">NM_001031712</a> | 0.5         |
| POLRMT          | polymerase (RNA) mitochondrial (DNA directed)                                                  | <a href="#">NM_005035</a>    | 0.5         |
| <b>GABRA3</b>   | gamma-aminobutyric acid (GABA) A receptor, alpha 3                                             | <a href="#">NM_000808</a>    | 0.5         |
| GALNT3          | UDP-N-acetyl-alpha-D-galactosamine:polypeptide N-acetylgalactosaminyltransferase 3 (GalNAc-T3) | <a href="#">NM_004482</a>    | 0.5         |
| <b>ENTPD1</b>   | ectonucleoside triphosphate diphosphohydrolase 1                                               | <a href="#">NM_001776</a>    | 0.5         |
| CCDC76          | coiled-coil domain containing 76                                                               | <a href="#">NM_019083</a>    | 0.5         |
| DAK             | dihydroxyacetone kinase 2 homolog ( <i>S. cerevisiae</i> )                                     | <a href="#">NM_015533</a>    | 0.5         |
| <b>FHL2</b>     | four and a half LIM domains 2                                                                  | <a href="#">NM_201557</a>    | 0.5         |
| <b>IGF1R</b>    | insulin-like growth factor 1 receptor                                                          | <a href="#">NM_000875</a>    | 0.5         |
| WIPF2           | WAS                                                                                            | <a href="#">NM_133264</a>    | 0.5         |
| <b>KIF5C</b>    | kinesin family member 5C                                                                       | <a href="#">NM_004522</a>    | 0.5         |
| <b>XRRA1</b>    | X-ray radiation resistance associated 1                                                        | <a href="#">BC064584</a>     | 0.5         |
| MLL3            | myeloid                                                                                        | <a href="#">NM_021230</a>    | 0.5         |
| HIST1H3J        | histone cluster 1, H3j                                                                         | <a href="#">NM_003535</a>    | 0.5         |
| <b>KIAA1024</b> | KIAA1024 protein                                                                               | <a href="#">NM_015206</a>    | 0.5         |
| UQCR            | ubiquinol-cytochrome c reductase, 6.4kDa subunit                                               | <a href="#">NM_006830</a>    | 0.5         |
| <b>WASF1</b>    | WAS protein family, member 1                                                                   | <a href="#">NM_003931</a>    | 0.5         |
| <b>SLC16A10</b> | solute carrier family 16, member 10 (aromatic amino acid transporter)                          | <a href="#">NM_018593</a>    | 0.5         |
| DTNA            | dystrobrevin, alpha                                                                            | <a href="#">NM_001390</a>    | 0.5         |
| CDCA5           | cell division cycle associated 5                                                               | <a href="#">NM_080668</a>    | 0.5         |
| JPH1            | junctionophilin 1                                                                              | <a href="#">NM_020647</a>    | 0.5         |
| RP11-54H7.1     | myosin heavy chain Myr 8                                                                       | <a href="#">NM_015011</a>    | 0.5         |
| LRRN1           | leucine rich repeat neuronal 1                                                                 | <a href="#">NM_020873</a>    | 0.5         |
| ATP5D           | ATP synthase, H <sup>+</sup> transporting, mitochondrial F1 complex, delta subunit             | <a href="#">NM_001687</a>    | 0.5         |
| CCDC28A         | coiled-coil domain containing 28A                                                              | <a href="#">NM_015439</a>    | 0.5         |
| <b>AKAP7</b>    | A kinase (PRKA) anchor protein 7                                                               | <a href="#">NM_016377</a>    | 0.5         |
| ODC1            | ornithine decarboxylase 1                                                                      | <a href="#">NM_002539</a>    | 0.5         |



| Gene symbol    | Gene name                                                                      | Accession No.                | Fold Change |
|----------------|--------------------------------------------------------------------------------|------------------------------|-------------|
| <b>PDK4</b>    | pyruvate dehydrogenase kinase, isozyme 4                                       | <a href="#">NM_002612</a>    | 0.5         |
| FOXO3A         | forkhead box O3A                                                               | <a href="#">NM_001455</a>    | 0.5         |
| HIST1H2AL      | histone cluster 1, H2al                                                        | <a href="#">NM_003511</a>    | 0.5         |
| CXCL1          | chemokine (C-X-C motif) ligand 1 (melanoma growth stimulating activity, alpha) | <a href="#">NM_001511</a>    | 0.5         |
| <b>TTLL7</b>   | tubulin tyrosine ligase-like family, member 7                                  | <a href="#">NM_024686</a>    | 0.5         |
| <b>FOXD1</b>   | forkhead box D1                                                                | <a href="#">NM_004472</a>    | 0.5         |
| GEM            | GTP binding protein overexpressed in skeletal muscle                           | <a href="#">NM_181702</a>    | 0.5         |
| <b>SLCO3A1</b> | solute carrier organic anion transporter family, member 3A1                    | <a href="#">NM_013272</a>    | 0.5         |
| FAM24B         | family with sequence similarity 24, member B                                   | <a href="#">NM_152644</a>    | 0.5         |
| <b>MFAP2</b>   | microfibrillar-associated protein 2                                            | <a href="#">NM_002403</a>    | 0.5         |
| <b>UST</b>     | uronyl-2-sulfotransferase                                                      | <a href="#">NM_005715</a>    | 0.5         |
| BSG            | basigin (Ok blood group)                                                       | <a href="#">NM_001728</a>    | 0.5         |
| <b>MMD</b>     | monocyte to macrophage differentiation-associated                              | <a href="#">NM_012329</a>    | 0.5         |
| <b>COL4A2</b>  | collagen, type IV, alpha 2                                                     | <a href="#">NM_001846</a>    | 0.5         |
| <b>CDC34</b>   | cell division cycle 34 homolog (S. cerevisiae)                                 | <a href="#">NM_004359</a>    | 0.5         |
| MAL2           | mal, T-cell differentiation protein 2                                          | <a href="#">NM_052886</a>    | 0.5         |
| CADPS2         | Ca <sup>2+</sup> -dependent activator protein for secretion 2                  | <a href="#">NM_017954</a>    | 0.4         |
| HIST1H4A       | histone cluster 1, H4a                                                         | <a href="#">NM_003538</a>    | 0.4         |
| PAGE2B         | P antigen family, member 2B                                                    | <a href="#">NM_001015038</a> | 0.4         |
| GPR63          | G protein-coupled receptor 63                                                  | <a href="#">NM_030784</a>    | 0.4         |
| RLN2           | relaxin 2                                                                      | <a href="#">NM_005059</a>    | 0.4         |
| PLEKHG4        | pleckstrin homology domain containing, family G (with RhoGef domain) member 4  | <a href="#">NM_015432</a>    | 0.4         |
| ITGA7          | integrin, alpha 7                                                              | <a href="#">NM_002206</a>    | 0.4         |
| EFCAB4B        | EF-hand calcium binding domain 4B                                              | <a href="#">NM_032680</a>    | 0.4         |
| POTE2          | protein expressed in prostate, ovary, testis, and placenta 2                   | <a href="#">NM_001004054</a> | 0.4         |
| CPT1C          | carnitine palmitoyltransferase 1C                                              | <a href="#">NM_152359</a>    | 0.4         |
| <b>NFE2L3</b>  | nuclear factor (erythroid-derived 2)-like 3                                    | <a href="#">NM_004289</a>    | 0.4         |
| <b>SEMA6D</b>  | sema domain, transmembrane domain, and cytoplasmic domain, (rystalline) 6D     | <a href="#">NM_153618</a>    | 0.4         |
| <b>ELOVL4</b>  | elongation of very long chain fatty acids (FEN1)                               | <a href="#">NM_022726</a>    | 0.4         |
| <b>IL8</b>     | interleukin 8                                                                  | <a href="#">NM_000584</a>    | 0.4         |

| <b>Gene symbol</b> | <b>Gene name</b>                                                                        | <b>Accession No.</b>         | <b>Fold Change</b> |
|--------------------|-----------------------------------------------------------------------------------------|------------------------------|--------------------|
| <b>ADM</b>         | adrenomedullin                                                                          | <a href="#">NM_001124</a>    | 0.4                |
| <b>PTGS2</b>       | prostaglandin-endoperoxide synthase 2 (prostaglandin G                                  | <a href="#">NM_000963</a>    | 0.4                |
| <b>ATP1B1</b>      | ATPase, Na <sup>+</sup>                                                                 | <a href="#">NM_001677</a>    | 0.4                |
| AKR1CL2*           | aldo-keto reductase family 1, member C-like 2                                           | <a href="#">NM_001040177</a> | 0.4                |
| ASF1B              | ASF1 anti-silencing function 1 homolog B ( <i>S. cerevisiae</i> )                       | <a href="#">NM_018154</a>    | 0.4                |
| ACY1               | aminoacylase 1                                                                          | <a href="#">NM_000666</a>    | 0.4                |
| <b>ADRBK2*</b>     | adrenergic, beta, receptor kinase 2                                                     | <a href="#">NM_005160</a>    | 0.4                |
| <b>MME</b>         | membrane metallo-endopeptidase (neutral endopeptidase, enkephalinase)                   | <a href="#">NM_007288</a>    | 0.4                |
| <b>TLE4</b>        | transducin-like enhancer of split 4 ( <i>E(sp1)</i> homolog, <i>Drosophila</i> )        | <a href="#">NM_007005</a>    | 0.4                |
| HSPA2              | heat shock 70kDa protein 2                                                              | <a href="#">NM_021979</a>    | 0.4                |
| GNAO1              | guanine nucleotide binding protein (G protein), alpha activating activity polypeptide O | <a href="#">NM_020988</a>    | 0.4                |
| <b>TCF4*</b>       | transcription factor 4                                                                  | <a href="#">NM_003199</a>    | 0.4                |
| SLFN11             | schlafen family member 11                                                               | <a href="#">NM_152270</a>    | 0.4                |
| EMB                | embigin homolog (mouse)                                                                 | <a href="#">NM_198449</a>    | 0.4                |
| ACOXL              | acyl-Coenzyme A oxidase-like                                                            | <a href="#">NM_018308</a>    | 0.4                |
| CENPH              | centromere protein H                                                                    | <a href="#">NM_022909</a>    | 0.4                |
| PPAP2C             | phosphatidic acid phosphatase type 2C                                                   | <a href="#">NM_177543</a>    | 0.4                |
| HIST2H2AB          | histone cluster 2, H2ab                                                                 | <a href="#">NM_175065</a>    | 0.4                |
| <b>SMAD1</b>       | SMAD family member 1                                                                    | <a href="#">NM_001003688</a> | 0.4                |
| SEZ6L2             | seizure related 6 homolog (mouse)-like 2                                                | <a href="#">NM_012410</a>    | 0.4                |
| BEX1               | brain expressed, X-linked 1                                                             | <a href="#">NM_018476</a>    | 0.4                |
| <b>MIDN</b>        | midnolin                                                                                | <a href="#">NM_177401</a>    | 0.4                |
| <b>KIAA0101*</b>   | Homo sapiens KIAA0101 (KIAA0101), transcript variant 1                                  | <a href="#">NM_014736</a>    | 0.4                |
| MUM1               | melanoma associated antigen (mutated) 1                                                 | <a href="#">NM_032853</a>    | 0.4                |
| <b>DUSP16</b>      | dual specificity phosphatase 16                                                         | <a href="#">NM_030640</a>    | 0.4                |
| JARID1D            | jumonji, AT rich interactive domain 1D                                                  | <a href="#">NM_004653</a>    | 0.4                |
| <b>HOOK1</b>       | hook homolog 1 ( <i>Drosophila</i> )                                                    | <a href="#">NM_015888</a>    | 0.4                |
| STARD10            | START domain containing 10                                                              | <a href="#">NM_006645</a>    | 0.4                |
| FANCD2*            | Fanconi anemia, complementation group D2                                                | <a href="#">NM_033084</a>    | 0.4                |
| CLDN11*            | claudin 11 (oligodendrocyte transmembrane protein)                                      | <a href="#">NM_005602</a>    | 0.4                |
| <b>CDC7</b>        | cell division cycle 7 homolog ( <i>S. cerevisiae</i> )                                  | <a href="#">NM_003503</a>    | 0.4                |
| <b>RORB</b>        | RAR-related orphan receptor B                                                           | <a href="#">NM_006914</a>    | 0.4                |

| Gene symbol     | Gene name                                                                                                                                   | Accession No.                | Fold Change |
|-----------------|---------------------------------------------------------------------------------------------------------------------------------------------|------------------------------|-------------|
| ORC4L           | origin recognition complex, subunit 4-like (yeast)                                                                                          | <a href="#">NM_002552</a>    | 0.4         |
| GPRC5B          | G protein-coupled receptor, family C, group 5, member B                                                                                     | <a href="#">NM_016235</a>    | 0.4         |
| HIST1H1A        | histone cluster 1, H1a                                                                                                                      | <a href="#">NM_005325</a>    | 0.4         |
| ISG20           | interferon stimulated exonuclease gene 20kDa                                                                                                | <a href="#">NM_002201</a>    | 0.4         |
| GUSB*           | glucuronidase, beta                                                                                                                         | <a href="#">NM_000181</a>    | 0.4         |
| <b>ALCAM</b>    | activated leukocyte cell adhesion molecule                                                                                                  | <a href="#">NM_001627</a>    | 0.4         |
| ALDH1A3         | aldehyde dehydrogenase 1 family, member A3                                                                                                  | <a href="#">NM_000693</a>    | 0.4         |
| MAGEC1          | melanoma antigen family C, 1                                                                                                                | <a href="#">NM_005462</a>    | 0.4         |
| <b>ITGA3</b>    | integrin, alpha 3 (antigen CD49C, alpha 3 subunit of VLA-3 receptor)                                                                        | <a href="#">NM_002204</a>    | 0.4         |
| EVI1            | ecotropic viral integration site 1                                                                                                          | <a href="#">NM_005241</a>    | 0.4         |
| <b>CREB5</b>    | cAMP responsive element binding protein 5                                                                                                   | <a href="#">NM_182899</a>    | 0.4         |
| SPATA13         | spermatogenesis associated 13                                                                                                               | <a href="#">NM_153023</a>    | 0.4         |
| <b>SORBS2</b>   | sorbin and SH3 domain containing 2                                                                                                          | <a href="#">NM_003603</a>    | 0.4         |
| <b>KIAA1244</b> | KIAA1244                                                                                                                                    | <a href="#">NM_020340</a>    | 0.4         |
| PAEP            | progestagen-associated endometrial protein (placental protein 14, pregnancy-associated endometrial alpha-2-globulin, alpha uterine protein) | <a href="#">NM_001018049</a> | 0.4         |
| RBMX*           | RNA binding motif protein, X-linked                                                                                                         | <a href="#">NM_002139</a>    | 0.4         |
| ZNF35           | zinc finger protein 35                                                                                                                      | <a href="#">NM_003420</a>    | 0.4         |
| <b>EGR3</b>     | early growth response 3                                                                                                                     | <a href="#">NM_004430</a>    | 0.4         |
| AMIGO2          | adhesion molecule with Ig-like domain 2                                                                                                     | <a href="#">NM_181847</a>    | 0.4         |
| <b>KLF15</b>    | Kruppel-like factor 15                                                                                                                      | <a href="#">NM_014079</a>    | 0.4         |
| <b>CDC42EP3</b> | CDC42 effector protein (Rho GTPase binding) 3                                                                                               | <a href="#">NM_006449</a>    | 0.4         |
| <b>PTPRU</b>    | protein tyrosine phosphatase, receptor type, U                                                                                              | <a href="#">NM_133178</a>    | 0.4         |
| HIST1H3B        | histone cluster 1, H3b                                                                                                                      | <a href="#">NM_003537</a>    | 0.4         |
| <b>DDX3Y</b>    | DEAD (Asp-Glu-Ala-Asp) box polypeptide 3, Y-linked                                                                                          | <a href="#">NM_004660</a>    | 0.4         |
| GRIN2B          | glutamate receptor, ionotropic, N-methyl D-aspartate 2B                                                                                     | <a href="#">NM_000834</a>    | 0.4         |
| <b>BAI3</b>     | brain-specific angiogenesis inhibitor 3                                                                                                     | <a href="#">NM_001704</a>    | 0.4         |
| <b>FZD7</b>     | frizzled homolog 7 (Drosophila)                                                                                                             | <a href="#">NM_003507</a>    | 0.4         |
| <b>PLEKHH1</b>  | pleckstrin homology domain containing, family H (with MyTH4 domain) member 1                                                                | <a href="#">NM_020715</a>    | 0.4         |

| Gene symbol    | Gene name                                                             | Accession No.                | Fold Change |
|----------------|-----------------------------------------------------------------------|------------------------------|-------------|
| MCM2           | MCM2 minichromosome maintenance deficient 2, mitotin (S. cerevisiae)  | <a href="#">NM_004526</a>    | 0.4         |
| <b>ABLIM1</b>  | actin binding LIM protein 1                                           | <a href="#">NM_001003408</a> | 0.4         |
| <b>NT5E</b>    | 5'-nucleotidase, ecto (CD73)                                          | <a href="#">NM_002526</a>    | 0.4         |
| <b>GLI3</b>    | GLI-Kruppel family member GLI3 (Greig cephalopolysyndactyly syndrome) | <a href="#">NM_000168</a>    | 0.4         |
| <b>BIN3</b>    | bridging integrator 3                                                 | <a href="#">NM_018688</a>    | 0.4         |
| CTCFL          | CCCTC-binding factor (zinc finger protein)-like                       | <a href="#">NM_080618</a>    | 0.4         |
| <b>COL6A3</b>  | collagen, type VI, alpha 3                                            | <a href="#">NM_057164</a>    | 0.4         |
| GPR98          | G protein-coupled receptor 98                                         | <a href="#">NM_032119</a>    | 0.4         |
| <b>STK11</b>   | serine                                                                | <a href="#">NM_000455</a>    | 0.4         |
| TMEPAI         | transmembrane, prostate androgen induced RNA                          | <a href="#">NM_020182</a>    | 0.4         |
| <b>IL6R</b>    | interleukin 6 receptor                                                | <a href="#">NM_000565</a>    | 0.4         |
| <b>HHIP</b>    | hedgehog interacting protein                                          | <a href="#">NM_022475</a>    | 0.4         |
| TRPM1          | transient receptor potential cation channel, subfamily M, member 1    | <a href="#">NM_002420</a>    | 0.4         |
| HLA-DPA1       | major histocompatibility complex, class II, DP alpha 1                | <a href="#">NM_033554</a>    | 0.4         |
| <b>PDE8B</b>   | phosphodiesterase 8B                                                  | <a href="#">NM_001029853</a> | 0.4         |
| TM6SF1         | transmembrane 6 superfamily member 1                                  | <a href="#">NM_023003</a>    | 0.3         |
| <b>ACVR2A</b>  | activin A receptor, type IIA                                          | <a href="#">NM_001616</a>    | 0.3         |
| SLFN5          | schlafen family member 5                                              | <a href="#">NM_144975</a>    | 0.3         |
| HIST1H4F       | histone cluster 1, H4f                                                | <a href="#">NM_003540</a>    | 0.3         |
| CRYZ           | rystalline, zeta (rystal reductase)                                   | <a href="#">NM_001889</a>    | 0.3         |
| <b>NR4A3</b>   | nuclear receptor subfamily 4, group A, member 3                       | <a href="#">NM_173200</a>    | 0.3         |
| <b>FAM129A</b> | family with sequence similarity 129, member A                         | <a href="#">NM_052966</a>    | 0.3         |
| <b>HOXA7</b>   | homeobox A7                                                           | <a href="#">NM_006896</a>    | 0.3         |
| PARM1          | Homo sapiens prostate androgen-regulated mucin-like protein 1         | <a href="#">NM_015393</a>    | 0.3         |
| <b>NKD1</b>    | naked cuticle homolog 1 (Drosophila)                                  | <a href="#">NM_033119</a>    | 0.3         |
| CCDC109B       | coiled-coil domain containing 109B                                    | <a href="#">NM_017918</a>    | 0.3         |
| KIAA0274       | KIAA0274                                                              | <a href="#">NM_014845</a>    | 0.3         |
| SLC27A2        | solute carrier family 27 (fatty acid transporter), member 2           | <a href="#">NM_003645</a>    | 0.3         |
| BEST1          | bestrophin 1                                                          | <a href="#">NM_004183</a>    | 0.3         |
| RPS4Y1         | ribosomal protein S4, Y-linked 1                                      | <a href="#">NM_001008</a>    | 0.3         |
| <b>CRIM1</b>   | cysteine rich transmembrane BMP regulator 1 (chordin-like)            | <a href="#">NM_016441</a>    | 0.3         |

| Gene symbol    | Gene name                                                                                                                  | Accession No.                | Fold Change |
|----------------|----------------------------------------------------------------------------------------------------------------------------|------------------------------|-------------|
| <b>CYBASC3</b> | cytochrome b, ascorbate dependent 3                                                                                        | <a href="#">NM_153611</a>    | 0.3         |
| <b>TSPAN5</b>  | tetraspanin 5                                                                                                              | <a href="#">NM_005723</a>    | 0.3         |
| <b>RARB</b>    | retinoic acid receptor, beta                                                                                               | <a href="#">NM_000965</a>    | 0.3         |
| KIAA1324L      | KIAA1324-like                                                                                                              | <a href="#">NM_152748</a>    | 0.3         |
| <b>MET</b>     | met proto-oncogene (hepatocyte growth factor receptor)                                                                     | <a href="#">NM_000245</a>    | 0.3         |
| <b>TRPS1</b>   | trichorhinophalangeal syndrome I                                                                                           | <a href="#">NM_014112</a>    | 0.3         |
| ADD2           | rystall 2 (beta)                                                                                                           | <a href="#">NM_001617</a>    | 0.3         |
| <b>CTNND2</b>  | catenin (cadherin-associated protein), delta 2 (neural plakophilin-related arm-repeat protein)                             | <a href="#">NM_001332</a>    | 0.3         |
| GPHN           | gephyrin                                                                                                                   | <a href="#">NM_020806</a>    | 0.3         |
| SNORD49B       | small nucleolar RNA, C                                                                                                     | <a href="#">NR_003043</a>    | 0.3         |
| <b>NFIB</b>    | nuclear factor I                                                                                                           | <a href="#">NM_005596</a>    | 0.3         |
| <b>HIPK2</b>   | homeodomain interacting protein kinase 2                                                                                   | <a href="#">NM_022740</a>    | 0.3         |
| <b>ULK2</b>    | unc-51-like kinase 2 (C. elegans)                                                                                          | <a href="#">NM_014683</a>    | 0.3         |
| HIST1H2AB      | histone cluster 1, H2ab                                                                                                    | <a href="#">NM_003513</a>    | 0.3         |
| PHF11          | PHD finger protein 11                                                                                                      | <a href="#">NM_001040444</a> | 0.3         |
| ACTBL1         | actin, beta-like 1                                                                                                         | <a href="#">NM_001004053</a> | 0.3         |
| LTBP1          | latent transforming growth factor beta binding protein 1                                                                   | <a href="#">NM_206943</a>    | 0.3         |
| <b>UCN2</b>    | urocortin 2                                                                                                                | <a href="#">NM_033199</a>    | 0.3         |
| <b>GPR126</b>  | G protein-coupled receptor 126                                                                                             | <a href="#">NM_020455</a>    | 0.3         |
| HIST1H2AJ      | histone cluster 1, H2aj                                                                                                    | <a href="#">NM_021066</a>    | 0.3         |
| ZFX            | zinc finger protein, X-linked                                                                                              | <a href="#">NM_003410</a>    | 0.3         |
| <b>SEMA5A</b>  | sema domain, seven thrombospondin repeats transmembrane domain <sup>TM</sup> and short cytoplasmic domain, (rystalline) 5A | <a href="#">NM_003966</a>    | 0.3         |
| ST6GALNAC2     | ST6 (alpha-N-acetyl-neuraminy-2,3-beta-galactosyl-1,3)-N-acetylgalactosaminide alpha-2,6-sialyltransferase 2               | <a href="#">NM_006456</a>    | 0.3         |
| PDZRN3         | PDZ domain containing RING finger 3                                                                                        | <a href="#">NM_015009</a>    | 0.3         |
| <b>HEY2</b>    | hairy                                                                                                                      | <a href="#">NM_012259</a>    | 0.3         |
| EIF1AY         | eukaryotic translation initiation factor 1A, Y-linked                                                                      | <a href="#">NM_004681</a>    | 0.3         |
| <b>USP7</b>    | ubiquitin specific peptidase 7 (herpes virus-associated)                                                                   | <a href="#">NM_003470</a>    | 0.3         |
| CD33           | CD33 molecule                                                                                                              | <a href="#">NM_001772</a>    | 0.3         |
| <b>ZNF711</b>  | zinc finger protein 711                                                                                                    | <a href="#">NM_021998</a>    | 0.3         |
| <b>DDAH1</b>   | dimethylarginine dimethylaminohydrolase 1                                                                                  | <a href="#">NM_012137</a>    | 0.3         |
| OCLN           | occludin                                                                                                                   | <a href="#">NM_002538</a>    | 0.3         |

| <b>Gene symbol</b> | <b>Gene name</b>                                                                              | <b>Accession No.</b>         | <b>Fold Change</b> |
|--------------------|-----------------------------------------------------------------------------------------------|------------------------------|--------------------|
| GABRA5             | gamma-aminobutyric acid (GABA) A receptor, alpha 5                                            | <a href="#">NM_000810</a>    | 0.3                |
| ALDOC              | aldolase C, fructose-bisphosphate                                                             | <a href="#">NM_005165</a>    | 0.3                |
| <b>SLC27A3</b>     | solute carrier family 27 (fatty acid transporter), member 3                                   | <a href="#">NM_024330</a>    | 0.3                |
| <b>EMP1</b>        | epithelial membrane protein 1                                                                 | <a href="#">NM_001423</a>    | 0.3                |
| CNDP1              | carnosine dipeptidase 1 (metallopeptidase M20 family)                                         | <a href="#">NM_032649</a>    | 0.3                |
| NETO2              | neuropilin (NRP) and tolloid (TLL)-like 2                                                     | <a href="#">NM_018092</a>    | 0.3                |
| SNORD13            | small nucleolar RNA, C                                                                        | <a href="#">NR_003041</a>    | 0.3                |
| GPR56              | G protein-coupled receptor 56                                                                 | <a href="#">NM_201525</a>    | 0.3                |
| <b>STARD13</b>     | START domain containing 13                                                                    | <a href="#">NM_178007</a>    | 0.3                |
| <b>LGALS8</b>      | lectin, galactoside-binding, soluble, 8 (galectin 8)                                          | <a href="#">NM_006499</a>    | 0.3                |
| RP6-213H19.1       | serine                                                                                        | <a href="#">NM_001042452</a> | 0.3                |
| NLRP2              | NLR family, pyrin domain containing 2                                                         | <a href="#">NM_017852</a>    | 0.3                |
| <b>LIFR</b>        | leukemia inhibitory factor receptor alpha                                                     | <a href="#">NM_002310</a>    | 0.3                |
| MATN2              | matrilin 2                                                                                    | <a href="#">NM_002380</a>    | 0.3                |
| SERPINB6           | serpin peptidase inhibitor, clade B (ovalbumin), member 6                                     | <a href="#">NM_004568</a>    | 0.2                |
| ACSL5              | acyl-CoA synthetase long-chain family member 5                                                | <a href="#">NM_203380</a>    | 0.2                |
| <b>SATB1</b>       | special AT-rich sequence binding protein 1 (binds to nuclear matrix)                          | <a href="#">NM_002971</a>    | 0.2                |
| ULBP1              | UL16 binding protein 1                                                                        | <a href="#">NM_025218</a>    | 0.2                |
| PAGE5              | P antigen family, member 5 (prostate associated)                                              | <a href="#">NM_130467</a>    | 0.2                |
| FADS2              | fatty acid desaturase 2                                                                       | <a href="#">NM_004265</a>    | 0.2                |
| ZNF620             | zinc finger protein 620                                                                       | <a href="#">NM_175888</a>    | 0.2                |
| <b>CIRBP</b>       | cold inducible RNA binding protein                                                            | <a href="#">NM_001280</a>    | 0.2                |
| SPP1               | secreted phosphoprotein 1 (osteopontin, bone sialoprotein I, early T-lymphocyte activation 1) | <a href="#">NM_001040060</a> | 0.2                |
| PASD1              | PAS domain containing 1                                                                       | <a href="#">NM_173493</a>    | 0.2                |
| <b>SOCS3</b>       | suppressor of cytokine signaling 3                                                            | <a href="#">NM_003955</a>    | 0.2                |
| <b>PLCB1</b>       | phospholipase C, beta 1 (phosphoinositide-specific)                                           | <a href="#">NM_182734</a>    | 0.2                |
| <b>PPARGC1A</b>    | peroxisome proliferator-activated receptor gamma, coactivator 1 alpha                         | <a href="#">NM_013261</a>    | 0.2                |
| <b>NAP1L5</b>      | nucleosome assembly protein 1-like 5                                                          | <a href="#">NM_153757</a>    | 0.2                |

| Gene symbol     | Gene name                                                                           | Accession No.                | Fold Change |
|-----------------|-------------------------------------------------------------------------------------|------------------------------|-------------|
| PRR6            | rystal rich 6                                                                       | <a href="#">NM_181716</a>    | 0.2         |
| <b>UTY*</b>     | ubiquitously transcribed tetratricopeptide repeat gene, Y-linked                    | <a href="#">NM_182659</a>    | 0.2         |
| MAN1A1          | mannosidase, alpha, class 1A, member 1                                              | <a href="#">NM_005907</a>    | 0.2         |
| TSPAN12         | tetraspanin 12                                                                      | <a href="#">NM_012338</a>    | 0.2         |
| <b>SH3BGR2</b>  | SH3 domain binding glutamic acid-rich protein like 2                                | <a href="#">NM_031469</a>    | 0.2         |
| NCAM2           | neural cell adhesion molecule 2                                                     | <a href="#">NM_004540</a>    | 0.2         |
| P2RY5           | purinergic receptor P2Y, G-protein coupled, 5                                       | <a href="#">NM_005767</a>    | 0.2         |
| HIST1H3A        | histone cluster 1, H3a                                                              | <a href="#">NM_003529</a>    | 0.2         |
| <b>SERPINA3</b> | serpin peptidase inhibitor, clade A (alpha-1 antiproteinase, antitrypsin), member 3 | <a href="#">NM_001085</a>    | 0.2         |
| KCNH1           | potassium voltage-gated channel, subfamily H (eag-related), member 1                | <a href="#">NM_172362</a>    | 0.2         |
| PFTK1           | PFTAIRE protein kinase 1                                                            | <a href="#">NM_012395</a>    | 0.2         |
| TMEM163         | transmembrane protein 163                                                           | <a href="#">NM_030923.4</a>  | 0.2         |
| ABCB4           | ATP-binding cassette, sub-family B (MDR                                             | <a href="#">NM_018849</a>    | 0.2         |
| <b>ADCY2</b>    | adenylate cyclase 2 (brain)                                                         | <a href="#">NM_020546</a>    | 0.2         |
| TMEM46          | transmembrane protein 46                                                            | <a href="#">NM_001007538</a> | 0.2         |
| MAGEA6          | melanoma antigen family A, 6                                                        | <a href="#">NM_005363</a>    | 0.2         |
| TF              | transferrin                                                                         | <a href="#">NM_001063</a>    | 0.2         |
| <b>MEST</b>     | mesoderm specific transcript homolog (mouse)                                        | <a href="#">NM_177524</a>    | 0.2         |
| <b>SLCO5A1</b>  | solute carrier organic anion transporter family, member 5A1                         | <a href="#">NM_030958</a>    | 0.2         |
| SDCCAG10        | serologically defined colon cancer antigen 10                                       | <a href="#">NM_005869</a>    | 0.2         |
| <b>CCND2</b>    | cyclin D2                                                                           | <a href="#">NM_001759</a>    | 0.2         |
| CRYAB           | rystalline, alpha B                                                                 | <a href="#">NM_001885</a>    | 0.2         |
| <b>FSTL5</b>    | follistatin-like 5                                                                  | <a href="#">NM_020116</a>    | 0.2         |
| TSPY2           | testis specific protein, Y-linked 2                                                 | <a href="#">NM_022573</a>    | 0.2         |
| PSMD5           | proteasome (prosome, macropain) 26S subunit, non-ATPase, 5                          | <a href="#">NM_005047</a>    | 0.1         |
| <b>JAG1</b>     | jagged 1 (Alagille syndrome)                                                        | <a href="#">NM_000214</a>    | 0.1         |
| <b>NLGN4X</b>   | neuroligin 4, X-linked                                                              | <a href="#">NM_181332</a>    | 0.1         |
| TSPY1           | testis specific protein, Y-linked 1                                                 | <a href="#">NM_003308</a>    | 0.1         |
| <b>THBS1</b>    | thrombospondin 1                                                                    | <a href="#">NM_003246</a>    | 0.1         |
| ABCB5           | ATP-binding cassette, sub-family B (MDR                                             | <a href="#">NM_178559</a>    | 0.1         |
| HIST1H2BM       | histone cluster 1, H2bm                                                             | <a href="#">NM_003521</a>    | 0.1         |
| PNLDC1          | poly(A)-specific ribonuclease (PARN)-like domain containing 1                       | <a href="#">NM_173516</a>    | 0.1         |

| <b>Gene symbol</b> | <b>Gene name</b>                        | <b>Accession No.</b>         | <b>Fold Change</b> |
|--------------------|-----------------------------------------|------------------------------|--------------------|
| ABCB1              | ATP-binding cassette, sub-family B (MDR | <a href="#">NM_000927</a>    | 0.1                |
| MOXD1              | monooxygenase, DBH-like 1               | <a href="#">NM_001031699</a> | 0.04               |



**Supplemental Table 2.** Expression and function of ADAR1 regulated genes

| Gene symbol   | Gene name                                                      | Accession No. | Fold change |          | Function                                                                                                                                              | Canonical pathways                                              | reference |
|---------------|----------------------------------------------------------------|---------------|-------------|----------|-------------------------------------------------------------------------------------------------------------------------------------------------------|-----------------------------------------------------------------|-----------|
|               |                                                                |               | Microarray  | qRT-PCR  |                                                                                                                                                       |                                                                 |           |
| <b>ITGB3</b>  | integrin, beta 3<br>(platelet glycoprotein IIIa, antigen CD61) | NM_000212     | 4.6         | 7.2±0.7  | Integral cell surface protein, key player in tumor proliferation, survival and metastasis. Correlates with disease progression in various tumor types | PI3K/AKT, P53, NF-κB, MAPK, FAK, TGFB, VEGF                     | (1, 2)    |
| <b>VAV2</b>   | vav 2 guanine nucleotide exchange factor                       | NM_003371     | 3.7         | 7.7±0.4  | Involved in the remodeling of the actin cytoskeleton, which is critical for cell division, growth, proliferation, adhesion and locomotion.            | Rac, Ras<br>Jak/Rho, MAPK and PI3K/Akt                          | (3-5)     |
| <b>SOX2</b>   | SRY (sex determining region Y)-box 2                           | NM_003106     | 3.6         | 10.3±0.7 | HMG box containing transcription factor, associated with cell "stemness" phenotype, increase proliferation and tumorigenicity.                        | TGFB                                                            | (6-8)     |
| <b>PAX6</b>   | paired box gene 6                                              | NM_001604     | 3.1         | 2.5±0.3  | Transcription Factor. Overexpressed in various cell types, required for cancer cells growth and survival.                                             | embryonic development (regulation of visual system development) | (9-11)    |
| <b>CD44</b>   | CD44 molecule (Indian blood group)                             | NM_000610     | 4.2         | 7.3±0.3  | Cell surface protein, promotes proliferation, migration, invasion, angiogenesis and correlates with poor survival.                                    | PI3K/AKT, Ras, ERK                                              | (12, 13)  |
| <b>IGFBP2</b> | insulin-like growth factor binding protein 2, 36kDa            | NM_000597     | 4.1         | 5.1±0.2  | IGF-independent effects on cellular proliferation, apoptosis, and mobility                                                                            | p38-MAPK , ERK1/2, SAPK/JNK and PI3K/Akt                        | (14-16)   |

|                |                                      |              |      |            |                                                                                                                                                                                                                                                    |                                         |          |
|----------------|--------------------------------------|--------------|------|------------|----------------------------------------------------------------------------------------------------------------------------------------------------------------------------------------------------------------------------------------------------|-----------------------------------------|----------|
| <b>SOCS3</b>   | suppressor of cytokine signaling 3   | NM_003955    | -4.4 | -4.1±0.01  | Reduce proliferation, mainly, by downregulate JAK/STAT signaling pathways.                                                                                                                                                                         | JAK/STAT, ERK, FAK and p53              | (17, 18) |
| <b>CCND2</b>   | cyclin D2                            | NM_001759    | -2.4 | -2.7±0.02  | Key role in the progression of Cell cycle. Interact and construct complexes with CDK4 or 6. Often silenced epigenetically in various tumors. Has inhibitory potential on proliferative ability and induced cell death in a CDK-independent manner. | PI3K/AKT, Wnt, cell cycle, GSK3, NF-κB. | (19-21)  |
| <b>BCL2L11</b> | BCL2-like 11 (apoptosis facilitator) | NM_138621    | -3.1 | -3.6±0.02  | A member of the Bcl protein family. Essential initiator of apoptosis, and act as tumor suppressor.                                                                                                                                                 | NOTCH, FasL, AKT, MAPK/ERK, EGFR        | (22-24)  |
| <b>SMAD1</b>   | SMAD family member 1                 | NM_001003688 | -5.9 | -6.1±0.004 | Signal transducer and transcriptional modulator . The SMAD-BMP signaling cascade regulate cell differentiation, proliferation, and apoptosis.                                                                                                      | SMAD/BMP                                | (25-27)  |

**Supplemental Table 3.** miRNAs expression profile

| miR                 | Fold-Change | Function | reference |
|---------------------|-------------|----------|-----------|
| <b>hsa-miR-29a</b>  | -62.4       | TS       | (28, 29)  |
| hsa-miR-509-3p      | -43.8       |          |           |
| <b>hsa-miR-503</b>  | -19.3       | TS       | (30, 31)  |
| hsa-miR-509-3-5p    | -15.2       |          |           |
| hsa-miR-330-3p      | -13.3       | TS       | (32)      |
| <b>hsa-miR-138</b>  | -10.6       | TS       | (33, 34)  |
| <b>hsa-miR-744</b>  | -9.4        | BOTH     | (35, 36)  |
| <b>hsa-let-7e</b>   | -8.8        | TS       | (37)      |
| hsa-miR-193a-5p     | -8.4        | TS       | (38)      |
| hsa-miR-324-5p      | -8.2        | TS       | (39)      |
| hsa-miR-886-3p      | -8.1        | OG       | (40)      |
| <b>hsa-miR-99b</b>  | -7.8        | BOTH     | (41-43)   |
| hsa-miR-652         | -6.9        | OG       | (44)      |
| <b>hsa-miR-378</b>  | -5.9        | OG       | (45)      |
| <b>hsa-miR-125b</b> | -5.8        | TS       | (46, 47)  |
| <b>hsa-miR-193b</b> | -5.8        | TS       | (48, 49)  |
| hsa-miR-324-3p      | -5.6        |          |           |
| <b>hsa-let-7d</b>   | -5.4        | TS       | (50, 51)  |
| hsa-miR-1307        | -5.0        |          |           |
| hsa-miR-455-3p      | -4.9        | OG       | (52, 53)  |
| hsa-miR-502-3p      | -4.8        |          |           |
| hsa-miR-1249        | -4.7        |          |           |
| hsa-miR-151-3p      | -4.2        | BOTH     | (54, 55)  |
| <b>hsa-miR-411</b>  | -4.2        |          |           |
| hsa-miR-125a-5p     | -4.0        | TS       | (56, 57)  |
| <b>hsa-miR-1301</b> | -3.9        |          |           |
| <b>hsa-miR-609</b>  | -3.8        |          |           |
| <b>hsa-miR-320c</b> | -3.8        | TS       | (58)      |
| <b>hsa-miR-320a</b> | -3.7        | TS       | (58)      |
| <b>hsa-miR-30d</b>  | -3.6        | BOTH     |           |
| <b>hsa-miR-1253</b> | -3.5        |          |           |
| <b>hsa-miR-320b</b> | -3.5        | TS       | (58)      |
| hsa-miR-508-5p      | -3.4        |          |           |
| <b>hsa-miR-877</b>  | -3.4        |          |           |
| <b>hsa-miR-15a</b>  | -3.4        | TS       | (59, 60)  |
| <b>hsa-miR-766</b>  | -3.2        |          |           |
| <b>hsa-miR-220a</b> | -3.2        |          |           |
| <b>hsa-miR-1275</b> | -3.2        |          |           |
| <b>hsa-miR-1248</b> | -3.1        |          |           |
| <b>hsa-miR-29b</b>  | -3.1        | TS       | (28, 61)  |
| <b>hsa-miR-892b</b> | -3.1        |          |           |
| <b>hsa-miR-1260</b> | -3.0        |          |           |
| <b>hsa-miR-377</b>  | -2.9        |          |           |
| <b>hsa-miR-940</b>  | -2.9        |          |           |
| <b>hsa-miR-130b</b> | -2.9        | OG       |           |
| <b>hsa-miR-320d</b> | -2.8        | TS       | (58)      |
| hsa-miR-542-5p      | -2.7        | TS       | (62, 63)  |

| miR                 | Fold-Change | Function | reference  |
|---------------------|-------------|----------|------------|
| hsa-miR-767-3p      | -2.7        |          |            |
| hsa-miR-512-5p      | -2.7        | TS       | (64)       |
| hsa-miR-628-3p      | -2.7        | TS       | (65)       |
| <b>hsa-miR-30a</b>  | -2.7        | TS       | (66, 67)   |
| hsa-miR-671-5p      | -2.6        |          |            |
| <b>hsa-miR-563</b>  | -2.5        |          |            |
| <b>hsa-miR-659</b>  | -2.5        |          |            |
| <b>hsa-miR-939</b>  | -2.5        |          |            |
| <b>hsa-miR-1271</b> | -2.4        |          |            |
| hsa-miR-34c-3p      | -2.4        | TS       | (68, 69)   |
| hsa-miR-509-5p      | -2.4        |          |            |
| <b>hsa-miR-185</b>  | -2.4        | TS       | (70, 71)   |
| hsa-miR-933         | -2.4        |          |            |
| <b>hsa-miR-211</b>  | -2.3        | TS       | (72, 73)   |
| hsa-miR-491-5p      | -2.3        | TS       | (74)       |
| hsa-miR-941         | -2.3        |          |            |
| <b>hsa-miR-346</b>  | -2.3        | OG       | (75)       |
| <b>hsa-miR-1280</b> | -2.3        |          |            |
| <b>hsa-miR-668</b>  | -2.3        |          |            |
| hsa-miR-720         | -2.2        |          |            |
| <b>hsa-miR-1202</b> | -2.2        |          |            |
| hsa-miR-331-3p      | -2.2        | TS       | (76)       |
| <b>hsa-let-7a</b>   | -2.2        | TS       | (77, 78)   |
| <b>hsa-miR-34a</b>  | -2.2        | TS       | (79, 80)   |
| hsa-miR-532-3p      | -2.2        |          |            |
| <b>hsa-miR-22</b>   | -2.2        | TS       | (81, 82)   |
| <b>hsa-miR-559</b>  | -2.1        | TS       | (83)       |
| hsa-miR-768-5p      | -2.1        |          |            |
| <b>hsa-miR-758</b>  | -2.1        |          |            |
| <b>hsa-miR-1269</b> | -2.1        |          |            |
| hsa-miR-125a-3p     | -2.1        | TS       | (84)       |
| <b>hsa-miR-489</b>  | -2.1        | TS       | (85)       |
| <b>hsa-miR-1296</b> | -2.1        | TS       | (86)       |
| hsa-miR-191         | -2.1        | BOTH     | (87-89)    |
| <b>hsa-miR-938</b>  | -2.0        | TS       | (90)       |
| <b>hsa-miR-663</b>  | -2.0        | TS       | (91)       |
| <b>hsa-miR-1227</b> | -2.0        |          |            |
| <b>hsa-miR-874</b>  | -2.0        | TS       | (92)       |
| hsa-miR-423-3p      | 2.0         | OG       | (93)       |
| hsa-miR-219-5p      | 2.0         | TS       | (94)       |
| <b>hsa-miR-92a</b>  | 2.0         | OG       | (95, 96)   |
| <b>hsa-miR-548i</b> | 2.0         |          |            |
| <b>hsa-miR-526b</b> | 2.0         |          |            |
| <b>hsa-miR-422a</b> | 2.0         |          |            |
| hsa-miR-574-3p      | 2.1         | OG       | (97)       |
| <b>hsa-miR-106b</b> | 2.1         | OG       | (98, 99)   |
| <b>hsa-miR-214</b>  | 2.1         | OG       | (100, 101) |
| hsa-miR-485-3p      | 2.2         |          |            |
| <b>hsa-miR-1256</b> | 2.2         |          |            |

| miR                 | Fold-Change | Function | reference  |
|---------------------|-------------|----------|------------|
| <b>hsa-miR-1184</b> | 2.2         |          |            |
| <b>hsa-miR-613</b>  | 2.2         |          |            |
| hsa-miR-576-5p      | 2.3         |          |            |
| hsa-miR-1292        | 2.3         |          |            |
| hsa-miR-188-5p      | 2.4         |          |            |
| hsa-miR-523         | 2.4         |          |            |
| hsa-miR-28-3p       | 2.5         | OG       | (102, 103) |
| <b>hsa-miR-92b</b>  | 2.5         | OG       | (95)       |
| hsa-miR-885-5p      | 2.6         | BOTH     | (97, 104)  |
| hsa-miR-887         | 2.7         |          |            |
| <b>hsa-miR-494</b>  | 2.7         | OG       | (54, 105)  |
| hsa-miR-361-5p      | 3.2         |          |            |
| <b>hsa-miR-181a</b> | 3.3         | TS       | (106, 107) |
| <b>hsa-miR-221</b>  | 3.3         | OG       | (108, 109) |
| <b>hsa-miR-425</b>  | 3.4         |          |            |
| <b>hsa-miR-500</b>  | 3.6         | OG       | (110)      |
| <b>hsa-miR-149</b>  | 3.8         | TS       | (111)      |
| <b>hsa-miR-130a</b> | 3.9         | OG       | (112, 113) |
| <b>hsa-miR-1231</b> | 4.6         |          |            |
| hsa-miR-768-3p      | 5.1         | BOTH     | (114)      |
| <b>hsa-miR-132</b>  | 5.8         | OG       | (94, 115)  |
| <b>hsa-miR-345</b>  | 5.9         | OG       | (116)      |
| <b>hsa-miR-27a</b>  | 7.0         | OG       | (117, 118) |
| hsa-miR-151-5p      | 7.2         | OG       | (119, 120) |
| <b>hsa-miR-1826</b> | 9.3         |          |            |
| <b>hsa-miR-100</b>  | 9.7         | TS       | (121, 122) |
| <b>hsa-miR-25</b>   | 10.5        | OG       | (98, 102)  |
| <b>hsa-miR-222</b>  | 10.8        | OG       | (123, 124) |
| <b>hsa-miR-181b</b> | 12.5        | OG       | (125, 126) |
| <b>hsa-miR-20a</b>  | 19.0        | OG       | (127, 128) |
| <b>hsa-miR-21</b>   | 20.0        | OG       | (129, 130) |
| <b>hsa-miR-19b</b>  | 22.2        | OG       | (131)      |
| hsa-miR-146a        | 36.1        | OG       | (132, 133) |
| <b>hsa-miR-26a</b>  | 36.3        | TS       | (134, 135) |
| hsa-miR-886-5p      | 61.5        | TS       | (136)      |

## Supplemental Table 4. Primers and Probes

### Real-Time primers

| primer        | Sequence 5'→3'                |
|---------------|-------------------------------|
| BCL2L11 Fwd   | 5' CTATCTCAGTGCAATGGCTTCCA    |
| BCL2L11 Rev   | 5' GGCGATCCATATCTCTGGGC       |
| CCND2 Fwd     | 5' ACCAACACAGACGTGGATTGTC     |
| CCND2 Rev     | 5' GCTGCAGGCTATTGAGGAGC       |
| CD44 Fwd      | 5' GACAGAATCCCTGCTACCAATATGG  |
| CD44 Rev      | 5' CTGTGTTTGGATTTGCAGTAGGCT   |
| IGFBP2 Fwd    | 5' CTACTIONCCTGCACATCCCCAA    |
| IGFBP2 Rev    | 5' TTCAGAGACATCTTGCACTGTTTGAG |
| ITGB3 Fwd     | 5' AAACCCCTGCTATGATATGAAGACC  |
| ITGB3 Rev     | 5' TTCAGAGACATCTTGCACTGTTTGAG |
| PAX6 Fwd      | 5' CCACCACACCGGTTTCCTC        |
| PAX6 Rev      | 5' GGTGTTTGTGAGGGCTGTGTCT     |
| SMAD1 Fwd     | 5' CGATGGACACAAACATGATGG      |
| SMAD1 Rev     | 5' GCAACCGCCTGAACATCTCCT      |
| SOCS3 Fwd     | 5' TCGATTCCGGACCAGCC          |
| SOCS3 Rev     | 5' GAGCCAGCGTGGATCTGC         |
| VAV2 Fwd      | 5' GCGAGACTTTGGAAAGGTCATCT    |
| VAV2 Rev      | 5' TCCCTTTGTTCTGCGCGAT        |
| SOX2 Fwd      | 5' GCTAGTCTCCAAGCGACGAA       |
| SOX2 Rev      | 5' GCAAGAAGCCTCTCCTTGAA       |
| S100B Fwd     | 5' TAGAGGAAATCAAAGAGCAGGAGG   |
| S100B Rev     | 5' TTCGCCGTCTCCATCATTG        |
| GAPDH F       | 5'TGCACCACCAACTGCTTAGC        |
| GAPDH R       | 5' GGCATGGACTGTGGTCATGAG      |
| ADAR1 F       | 5' ACAGCCAAAGACACTCCCTCTC     |
| ADAR1 R       | 5' GGCTCAGCATGGCTATCTGG       |
| ZSL_HIS_F     | 5' CAGCTGCAATCCCTGAGAC        |
| ZSL_HIS_R     | 5' GGTGATGGTGTGATGACAGGTG     |
| DSSL_His_F    | 5' GCTCTCCGTGTCTTGATTGGG      |
| DSSL_His_R    | 5' TGGTGTGGTGTGATGCACTG       |
| Dicer Fwd     | 5' GCCATTGGACACATCAATAGATACTG |
| Dicer Rev     | 5' GTTTCTGCATTTAGGAGCTAGATGA  |
| Drosha Fwd    | 5' CTGTGGGAAAGGACCAAGTATTCAG  |
| Drosha Rev    | 5' ATGAACCGCTTCTGATGGGC       |
| DGCR8 Fwd     | 5' CAAGATGGTCAAGCAGGAGACAT    |
| DGCR8 Rev     | 5' TGTGCAGGTTGGGCTTGTTTC      |
| HPRT F        | 5' TGACACTGGCAAAACAATGCA      |
| HPRT R        | 5' GGTCTTTTTACCAGCAAGCT       |
| pri-miR-34a F | 5' GGCCAGCTGTGAGTGTCTTCT      |
| pri-miR-34a R | 5' CAAGAGGGAAGATGAAGCGAG      |
| pre-miR-34a   | 5' GCAGTGTCTTAGCTGGTTGTTGTG   |
| pre-miR-34a   | 5' GCAGCACTTCTAGGGCAGTATACTTG |
| Pri-miR-21 F  | 5' TTTTGTGTTTGGCTTGGGAGGA     |
| pri-miR-21 R  | 5' AGCAGACAGTCAGGCAGGAT       |
| pre-miR-21    | 5' TGTCCGGTAGCTTATCAGAC       |
| pre-miR-21    | 5' TGTCCAGACAGCCCATCGACT      |
| ADAR1 CAT F   | 5' GTGACTACGAGACGGCCAA        |
| ADAR1 CAT R   | 5' GGTGATGATGTACTIONGGGCAG    |

## Cloning primers

| primer          | Sequence 5'→3'                                                |
|-----------------|---------------------------------------------------------------|
| ADAR1-P150 F    | 5'CGGGCAATGCCTCGC                                             |
| ADAR1-P150 R    | 5' AATGGATGGGTGTAGTATCCGC                                     |
| ADAR1-P110 F    | 5' GGCAGCCTCCGGGTG                                            |
| ADAR1-P110 R    | 5' CTGTCTGTGCTCATAGCCTTGA                                     |
| ADAR1-L Fwd     | 5' GCTAAGCTTGCCGCCACCATGAATCCGCGGCAGGGGTATTC                  |
| ADAR1-L Rev     | 5' GCTCTCGAGCTATACTGGGCAGAGATAAAAAGTTCTTTTCCTCC               |
| ADAR1-S Fwd     | 5' GCTAAGCTTGCCGCCACCATG GCCGAGATCAAGGAGAAAATCTGC             |
| ADAR1-S Rev     | 5' GCTCTCGAGCTATACTGGGCAGAGATAAAAAGTTCTTTTCCTCC               |
| ADAR1-L Res F   | 5' GGAGAAAATCTGTGATTACCTCTTCAATGTGTC                          |
| ADAR1-L Res R   | 5' GACACATTGAAGAGGTAATCACAGATTTTCTCC                          |
| ADAR1-S Res F   | 5' GCTAAGCTTGCCGCCACC ATGGCCGAGATCAAGGAGAAAATCTGTGATTACCTCTTC |
| ADAR1 UTR 17 F  | 5' GCTCTCGAGCTACTTCCCCTCTTTCCCTTCT                            |
| ADAR1 UTR 17 R  | 5' GTACGCGGCCGCAAACCTCTGCTATTGCTTGAGC                         |
| SDM miR17 F     | 5' CCATCCTGTAATGTAGCCAGC                                      |
| SDM miR17 R     | 5' GCTGGCTACATTACAGGATGG                                      |
| miR-17 Fwd      | 5' GTACGCGGCCGCGCTGAATTTGTATGGTTTATAGTTGTTA                   |
| miR-17 Rev      | 5' GTGAATTCGCACCTTAGAACAAAAAGCACT                             |
| ADAR1 UTR 432 F | 5' GCTCTCGAGGGTTGTCTTCAAACCTCTGTGAGG                          |
| ADAR1 UTR 432 R | 5' GTACGCGGCCGCAAAGTCACTGTTATCAAGGGACACAT                     |
| SDM miR432-A F  | 5'-TTAGAGTGTGGTTCATGACGCTACGAGCAGAGCAGGGAAGAGC                |
| SDM miR432-A R  | 5'-GCTCTTCCCTGCTCTGCTCGTAGCGTCATGACCAACACTCTAA                |
| SDM miR432-B F  | 5'-TTGGAGTCTTGGTTGTGACGCTACGAGCAGAGTGAGGAAGACC                |
| SDM miR432-B R  | 5'-GGTCTTCTCACTCTGCTCGTAGCGTCACAACCAAGACTCCAA                 |
| miR-432 Fwd     | 5' GTACGCGGCCGCTGACTGATGCTTCTTTTCATCC                         |
| miR-432 Rev     | 5' GTGAATTCATAAGAATCCATCATCAAAACAA                            |
| ADAR1-L DOM F   | 5' GCTAAGCTTGCCGCCACCATGAATCCGCGGCAGGGGTAT                    |
| ADAR1-S DOM F   | 5' GCTAAGCTTGCCGCCACCATGGCCGAGATCAAGGAGAAA                    |
| ΔCAT Rev        | 5' GATCTCGAGCTAATGGTGATGGTGATGATGCACTGGGGTTACCTCTGTGAA        |
| Z-DBD Rev       | 5' GATCTCGAGCTAATGGTGATGGTGATGATGACAGGTGAGGAACCTCTGCGTTTCT    |
| dsRBD Fwd       | 5' GCTAAGCTTGCCGCCACCCCTCTTCTACAGTCATGGCTTG                   |
| CAT ONLY F      | 5' GCTAAGCTTGCCGCCACCATGACCTTCCATGACCAGATAGCC                 |
| CAT ONLY R      | 5' GATCTCGAGCTAATGGTGATGGTG                                   |
| CAT mut F       | 5' ACTGTCAATGACTGCCAAGCAGCAAATAATCTCCCGGAGAG                  |
| CAT mut R       | 5' CTCTCCGGGAGATTATTGCTGCTTGGCAGTCATTGACAGT                   |

## Additional primers and probes

| primer          | Sequence 5'→3'                                              |
|-----------------|-------------------------------------------------------------|
| mir432 amp10F   | 5' AGGAAGAGAGTTTTTGTGTTTTTGTAGGTTTTGT                       |
| mir432 amp10R   | 5' CAGTAATACGACTCACTATAGGGAGAAGGCTAAAAAATCCACCCAATAACCTACTC |
| RTL1 amp16F     | 5' AGGAAGAGAGTTGTTTTAGAGAGGTGGATGGTTAG                      |
| RTL1 amp16R     | 5' CAGTAATACGACTCACTATAGGGAGAAGGCTAATACCTAAAACCACAAAAAATTC  |
| T7-promoter tag | 5' CAGTAATACGACTCACTATAGGGAGAAGGCT                          |
| 10-mer tag      | 5' AGGAAGAGAG                                               |
| U6 probe        | 5' CACGAATTTGCGTGTATCCTT                                    |
| miR-21 probe    | 5' TCAACATCAGTCTGATAAGCTA                                   |
| miR-34a probe   | 5' ACAACCAGCTAAGACACTGCCA                                   |

**Supplemental Table 5.** Target genes of miR-21 and miR-34a

| <b>miR</b>     | <b>Target Gene</b> | <b>Fold Change</b> | <b>Validated Target</b> | <b>Reference</b>  |
|----------------|--------------------|--------------------|-------------------------|-------------------|
| <b>miR-21</b>  | ACVR2A             | 0.3                |                         |                   |
|                | EGR3               | 0.4                | <b>Yes</b>              | <b>(137, 138)</b> |
|                | JAG1               | 0.1                | <b>Yes</b>              | <b>(139, 140)</b> |
|                | LIFR               | 0.3                |                         |                   |
|                | MATN2              | 0.3                |                         |                   |
|                | NFIB               | 0.3                | <b>Yes</b>              | <b>(141, 142)</b> |
|                | SATB1              | 0.2                | <b>Yes</b>              | <b>(143)</b>      |
| <b>miR-34a</b> | ABCD1              | 2.8                |                         |                   |
|                | ACBD3              | 2.2                |                         |                   |
|                | EEA1               | 9.2                |                         |                   |
|                | FAM70A             | 4.3                |                         |                   |
|                | GOLPH3L            | 2.7                |                         |                   |
|                | ITSN1              | 2.0                |                         |                   |
|                | KIAA1217           | 2.7                |                         |                   |
|                | MAP1A              | 3.9                |                         |                   |
|                | NAV3               | 2.4                |                         |                   |
|                | PDE7B              | 5.3                |                         |                   |



## **Supplementary Methods:**

### **DNA extraction and bisulfate treatment**

Genomic DNA of melanoma cell lines was extracted using Wizard® genomic DNA purification kit (Promega) according to manufacturer's instructions. Bisulfate treatment was carried out on 1µg of gDNA EZ-DNA® methylation gold kit (Zymo) according to manufacturer's instructions.

### **Quantification of massARRAY methylation analysis**

PCR was performed using the 1 µg of bisulfate treated DNA as template with specific primers (Supplemental Table 4) especially designed, using EpiDesigner BETA software (Sequenom®), to amplify highly methylated areas in the genomic template. Each reverse primer has a T7-promoter tag and each forward primer has a 10-mer tag (Supplemental Table 4). A total of 3 primer pairs were designed, all gave specific PCR products (300-500bp). After PCR amplification, a SAP (Shrimp Alkaline Phosphate) treatment was performed using 5µl of PCR product. 2µl of the SAP treated PCR product was subjected to in vitro transcription and RNaseA cleavage for the T-cleavage reaction (MASScleave). The samples were purified by resin treatment and spotted on 384-well spectroCHIP® by MASSarray® Nanodispenser. This was followed by spectral acquisition on a MASSarray Analyser. The results were later analyzed by EpiTyper software which gives quantitative methylation levels of individual CpG sites. The average methylation ratio was calculated by averaging the ratios of the melanoma vs. normal samples. Non Template control (NTC) sample used as negative control. Methylation readings that had other signal overlaps and silent peaks were eliminated from the calculations.

### **De-methylation experiments**

Melanoma cell lines A375 and MeWo were treated for 2, 4 and 6 days with 3µM anti-methylation reagent 5'-Aza-2-deoxycytidine (Sigma-Aldrich) dissolved in 50% acetic acid and 3mM anti-acetylation agent 4-phenylbutyric acid (4-PBA, Sigma-Aldrich) dissolved in

50% EtOH. Control samples were treated with medium containing the same volume of 50% acetic acid and 50% EtOH. The growth medium containing these reagent or dissolvent only was changed daily. The treated cells and the control samples were harvested at day 2, 4 and 6. RNA, cell lysate and gDNA were extracted from the cells, as previously mentioned.

### **Northern Blot**

Total RNA isolation was performed using the Tri-Reagent protocol (Sigma-Aldrich). RNA samples (50 ug each) were electrophoresed on 10% Acrylamide Urea gels (Amersham Bioscience) and transferred onto nylon based membrane (GeneScreen Plus), using semi dry method (Amersham Biosciences). Pre-Hybridization was done at 42°C in 3ml of ExpressHyb® (BD bioscience) solution for 30 min. Labeled probe was added directly into the prehybridization solution and the membrane was hybridized at 42°C for 1 h. Membranes were shortly washed at 42°C 3 times with 10ml room temperature SSCX0.1 0.05% SDS solution and twice with 10ml warm (42°C) SSCX0.1 0.05% SDS solution for 30 min. The oligonucleotides used as probes are the complementary sequences of the mature miRNA (miRbase Registry). U6 was used to normalize expression levels. 100 ng of each probe was end labeled with 100 mCi [ $\gamma$ -32P]ATP using the polynucleotide kinase (New England Biolabs). Blots were stripped in boiling 0.1% SDS for 10 min before rehybridization.

### **Immunoprecipitation**

HEK 293T cells were transfected with pCDNA3 ADAR1-P110, CEACAM1 or pCDNA3 empty vector (Mock). Cells were harvested 48 hrs post transfection, total cell lysates were extracted and incubated for 40 min at 4°C with either anti-ADAR1 or anti-CEACAM1 antibody coated 1.5 mg Dynabeads® protein G beads (Sigma-Aldrich). Following incubation, the beads-antibody-target protein complex was washed and the immunoprecipitated protein was eluted according to manufacturer's instructions. Both total cell lysates and immunoprecipitates were analyzed in SDS-PAGE or Western blot according to standard protocols. In experiments where RNA-protein binding was tested, the assay was performed on  $20 \times 10^6$  cells. Total RNA was isolated from the immunoprecipitate with Tri Reagent (Sigma-

Aldrich) or with miRNeasy® kit (Qiagen), according to the manufacturer's instructions, followed by standard cDNA synthesis and real time PCR assays.

## **Supplementary Tables - Legends:**

### **Supplemental Table 1:** *Whole genome microarray gene list*

List of significantly (defined as >2 or <0.5 fold change) altered genes expression level. Fold-change, represents relative ( $2^{-\log}$ ) values used to identify genes with different expression level between treatments - ADAR1 knockdown divided by Control, that are outside of the threshold level (determined by the microarray internal control). P-value cutoff, characterizing the significance of the difference between the treatments is lower than 0.05. Genes bioinformatically predicted as editing targets are indicated with an asterix (\*). Genes bioinformatically predicted as targets of miRNAs are indicated in bold.

### **Supplemental Table 2:** *Validation of microarray results using quantitative real time PCR*

Ten genes were selected for validation of microarray results. Their expression was examined by qRT-PCR; Fold-change, represents relative ( $2^{-\Delta\Delta C_t}$ ) values used to identify genes with different expression levels between treatments - ADAR1 knockdown vs. Control (Results represent the means  $\pm$ SE of three independent experiments). The expression values of both microarray and the qRT-PCR are presented; Function, the role of each gene based on literary review; Canonical pathway, the affiliation of each gene to the appropriate cellular pathway based on literary review.

### **Supplemental Table 3:** *miRNAs expression profile*

List of the 131 significantly changed miRNAs (defined as >2 or <0.5 fold change) expressed in 624mel ADAR1-KD cells compared to control. Star miRs are not included in this list. OG represents oncogenic miRNAs; TS represents tumor suppressor miRNAs. miRs bioinformatically predicted to target genes from the whole genome microarray gene list (supplemental table 1) are indicated in bold.

### **Supplemental Table 4:** *List of Primers*

List of the primers used for PCR, Real Time RT-PCR, Northern Blot and Methylation assay in this study (primers are displayed 5'  $\rightarrow$  3').

### **Supplemental Table 5:** *miR-21 and miR-34a targets*

List of bioinformatically predicted targets (Target Scan 5.1) of miR-21 and miR-34 based on the genes presented in supplemental table 1. Several targets are validated.

## **Supplementary Figures - Legends:**

### **Supplemental Figure 1:** *Expression of ADAR1 in melanoma progression*

Immunohistochemical staining of ADAR in (A) Normal skin (control); (B) Nevi; (C) primary tumor; and (D) metastatic melanoma from two independent TMA slides set provided by MGH and CDP; Tissues were stained for ADAR1 (brown) followed by hematoxylin counterstaining (blue).

### **Supplemental Figure 2:** *Evaluation of gross cell morphology and image analysis*

Microphotographs of cells were taken using an Olympus digital camera and Olympus light microscope (original magnification  $\times 20$ ). The morphological differences between the cells were quantified with ImageJ (NIH) image processing and analysis software, using NeuronJ to evaluate the long and short axes of each cell (144). Measurements were performed for more than 50 randomly selected cell images in each experiment. The data were converted from pixels to  $\mu\text{m}$  with an appropriate scale. Data represent the mean  $\pm$ SEM. Asterisks represent P values: \*\*\* $P < 0.001$  (2-tailed t-test).

### **Supplemental Figure 3:** *the effect of ADAR1 on proliferation rate in multiple melanoma cell lines.*

multiple melanoma cell lines were stably transduced with ADAR1 shRNA (ADAR1-KD) and scrambled sequence (Control) vector. (A) Net proliferation was monitored by standardized XTT assay, in 24 hrs intervals, for 72 hrs; Trypan blue staining confirmed  $>97\%$  viability of the cells. (B) Expression of ADAR1 gene was examined using qPCR. Data represent the mean  $\pm$ SEM of three independent experiments, each performed in triplicates. Asterisks represent P values: \* $P < 0.05$ , \*\* $P < 0.01$ , \*\*\* $P < 0.001$  (2-tailed t-test).

### **Supplemental Figure 4:** *Chemotherapy induced apoptosis in 624mel ADAR1 manipulated cell system.*

Apoptotic response following 48 hrs of treatment with (A) Cisplatin ( $100\mu\text{M}$ ) or (B) Taxol ( $50\mu\text{M}$ ). Annexin V-FITC and PI staining followed by FACS analysis were performed to quantify the percentage of cells undergoing apoptosis. The quadrant settings were set according to the Control samples data. A Representative dot blot out of three experiments is shown.

### **Supplemental Figure 5:** *functional effects of 526mel ADAR1 manipulated cell system.*

(A) 526mel cells were stably transduced with ADAR1 shRNA and scrambled sequence (control) vector. (A) Net proliferation was monitored by standardized XTT assay, in 24 hrs intervals, for 72 hrs; Trypan blue staining confirmed  $>97\%$  viability of the cells (B) Morphology of the cells was assessed using a phase-contrast

microscope. (C) A to I editing rate of BLCAP by ADAR1 was estimated by Sequenom massarray. (D) Expression of ADAR1 gene was examined using qPCR. Data for A, C, D represent the mean  $\pm$ SEM of three independent experiments, each performed in triplicates Asterisks represent P values: \*P<0.05, \*\*P<0.01, \*\*\*P<0.001 (2-tailed t-test).

**Supplemental Figure 6:** *Reduced ADAR1 regulate gene expression in an RNA editing independent manner.*

624mel cells were stably transduced with ADAR1 shRNA, Rescue-L, Reascue-S, scrambled sequence (control) vector and empty vector. (A) FACS staining with anti-CD44 and anti-ITGB3 antibodies to validate gene expression level as described by microarray results (Supplemental Table 1). 624mel cells were stably transduced with both ADAR1 isoforms over-expression, mock plasmid and deletion constructs plasmids. (B) Verification of RNA editing independent ADAR1-dependent regulation of ITGB3, VAV2 and CD44 expression pattern, representatives of microarray gene profile, in 624mel domains cell system compared to mock (control). The mRNA levels of ADAR1 were examined using qRT-PCR. Data represent the mean  $\pm$ SEM of three independent experiments, each performed in triplicates Asterisks represent P values: \*\*P<0.01 (2-tailed t-test).

**Supplemental Figure 7:** *Construction of Dual luciferase system based on HAG and PAG melanoma cell lines*

(A) Construction of dual luciferase system for miR-17-5p and miR-432 based on their seed sequence (underlined) and the naïve and mutated target sequences (underlined) of ADAR1 3'UTR (B) miR-17-5p, (C) miR-432 and (D) ADAR1 expression level examined by qRT-PCR. . Data represent the mean  $\pm$ SEM of three independent experiments, each performed in triplicates Asterisks represent P values: \*\*P<0.01 (2-tailed t-test).

**Supplemental Figure 8:** *Specific correlation between ADAR1, miR-17-5p and miR432 expression.*

14 low-passage primary cultures of metastatic melanoma and 1 normal melanocytes were tested for miR-204, -185, -184, -133a, -20a, -31 and ADAR1 expression, normalized to the appropriate endogenous control and presented as 1/ $\Delta$ Ct;

**Supplemental Figure 9:** *Methylation sites at chr.14q32.2 genomic area*

Description of the Dlk1-Dio3 genomic area and the amplicons used to test methylation rate of miR-432 (amplicon A, underlined nucleotides) and positive control (amplicon B, located at a known methylated site in RTL1 gene)

## References

1. Yu, F., Deng, H., Yao, H., Liu, Q., Su, F., and Song, E. 2010. Mir-30 reduction maintains self-renewal and inhibits apoptosis in breast tumor-initiating cells. *Oncogene* 29:4194-4204.
2. Muller, D.W., and Bosserhoff, A.K. 2008. Integrin [beta]3 expression is regulated by let-7a miRNA in malignant melanoma. *Oncogene* 27:6698-6706.
3. Patel, V., Rosenfeldt, H.M., Lyons, R., Servitja, J.-M., Bustelo, X.R., Siroff, M., and Gutkind, J.S. 2007. Persistent activation of Rac1 in squamous carcinomas of the head and neck: evidence for an EGFR/Vav2 signaling axis involved in cell invasion. *Carcinogenesis* 28:1145-1152.
4. Lai, S.Y., Ziober, A.F., Lee, M.N., Cohen, N.A., Falls, E.M., and Ziober, B.L. 2008. Activated Vav2 modulates cellular invasion through Rac1 and Cdc42 in oral squamous cell carcinoma. *Oral Oncology* 44:683-688.
5. Duan, L., Raja, S.M., Chen, G., Virmani, S., Williams, S.H., Clubb, R.J., Mukhopadhyay, C., Rainey, M.A., Ying, G., Dimri, M., et al. 2011. Negative Regulation of EGFR-Vav2 Signaling Axis by Cbl Ubiquitin Ligase Controls EGF Receptor-mediated Epithelial Cell Adherens Junction Dynamics and Cell Migration. *Journal of Biological Chemistry* 286:620-633.
6. Jia, X., Li, X., Xu, Y., Zhang, S., Mou, W., Liu, Y., Liu, Y., Lv, D., Liu, C.-H., Tan, X., et al. 2011. SOX2 promotes tumorigenesis and increases the anti-apoptotic property of human prostate cancer cell. *Journal of Molecular Cell Biology*.
7. Gillis, A.J.M., Stoop, H., Biermann, K., van Gurp, R.J.H.L.M., Swartzman, E., Cribbes, S., Ferlinz, A., Shannon, M., Wolter Oosterhuis, J., and Looijenga, L.H.J. 2011. Expression and interdependencies of pluripotency factors LIN28, OCT3/4, NANOG and SOX2 in human testicular germ cells and tumours of the testis. *International Journal of Andrology*:no-no.
8. Du, L., Yang, Y., Xiao, X., Wang, C., Zhang, X., Wang, L., Zhang, X., Li, W., Zheng, G., Wang, S., et al. Sox2 nuclear expression is closely associated with poor prognosis in patients with histologically node-negative oral tongue squamous cell carcinoma. *Oral Oncology* In Press, Corrected Proof.
9. Gasche, J.A., Hoffmann, J., Boland, C.R., and Goel, A. 2011. Interleukin-6 promotes tumorigenesis by altering DNA methylation in oral cancer cells. *International Journal of Cancer* 129:1053-1063.
10. Moelans, C.B., Verschuur-Maes, A.H.J., and van Diest, P.J. 2011. Frequent promoter hypermethylation of BRCA2, CDH13, MSH6, PAX5, PAX6 and WT1 in ductal carcinoma in situ and invasive breast cancer. *The Journal of Pathology*:n/a-n/a.
11. Zhang, X., Huang, C.T., Chen, J., Pankratz, M.T., Xi, J., Li, J., Yang, Y., LaVaute, T.M., Li, X.-J., Ayala, M., et al. 2010. Pax6 Is a Human Neuroectoderm Cell Fate Determinant. *Cell Stem Cell* 7:90-100.
12. Zöller, M. 2011. CD44: can a cancer-initiating cell profit from an abundantly expressed molecule? *Nat Rev Cancer* 11:254-267.
13. Orian-Rousseau, V. 2010. CD44, a therapeutic target for metastasising tumours. *European Journal of Cancer* 46:1271-1277.
14. Hoeflich, A., Reisinger, R., Lahm, H., Kiess, W., Blum, W.F., Kolb, H.J., Weber, M.M., and Wolf, E. 2001. Insulin-like Growth Factor-binding Protein 2 in Tumorigenesis. *Cancer Research* 61:8601-8610.
15. Hsieh, D., Hsieh, A., Stea, B., and Ellsworth, R. 2010. IGFBP2 promotes glioma tumor stem cell expansion and survival. *Biochemical and Biophysical Research Communications* 397:367-372.
16. Uzoh, C.C., Holly, J.M.P., Biernacka, K.M., Persad, R.A., Bahl, A., Gillatt, D., and Perks, C.M. 2011. Insulin-like growth factor-binding protein-2 promotes prostate cancer cell growth via IGF-dependent or -independent mechanisms and reduces the efficacy of docetaxel. *Br J Cancer* 104:1587-1593.

17. Lin, Y.C., Lin, C.K., Tsai, Y.H., Weng, H.H., Li, Y.C., You, L., Chen, J.K., Jablons, D.M., and Yang, C.T. 2010. Adenovirus-mediated SOCS3 gene transfer inhibits the growth and enhances the radiosensitivity of human non-small cell lung cancer cells. *Oncol Rep* 24:1605-1612.
18. Lesina, M., Kurkowski, Magdalena U., Ludes, K., Rose-John, S., Treiber, M., Klöppel, G., Yoshimura, A., Reindl, W., Sipos, B., Akira, S., et al. 2011. Stat3/Socs3 Activation by IL-6 Transsignaling Promotes Progression of Pancreatic Intraepithelial Neoplasia and Development of Pancreatic Cancer. *Cancer Cell* 19:456-469.
19. Sarkar, R., Hunter, I.A., Rajaganeshan, R., Perry, S.L., Guillou, P., and Jayne, D.G. 2010. Expression of cyclin D2 is an independent predictor of the development of hepatic metastasis in colorectal cancer. *Colorectal Disease* 12:316-323.
20. Metcalf, R.A., Zhao, S., Anderson, M.W., Lu, Z.S., Galperin, I., Marinelli, R.J., Cherry, A.M., Lossos, I.S., and Natkunam, Y. 2010. Characterization of D-cyclin proteins in hematolymphoid neoplasms: lack of specificity of cyclin-D2 and D3 expression in lymphoma subtypes. *Mod Pathol* 23:420-433.
21. Dong, Q., Meng, P., Wang, T., Qin, W., Qin, W., Wang, F., Yuan, J., Chen, Z., Yang, A., and Wang, H. 2010. MicroRNA Let-7a Inhibits Proliferation of Human Prostate Cancer Cells In Vitro and In Vivo by Targeting E2F2 and CCND2. *PLoS ONE* 5:e10147.
22. Seitz, S.J., Schleithoff, E.S., Koch, A., Schuster, A., Teufel, A., Staib, F., Stremmel, W., Melino, G., Krammer, P.H., Schilling, T., et al. 2010. Chemotherapy-induced apoptosis in hepatocellular carcinoma involves the p53 family and is mediated via the extrinsic and the intrinsic pathway. *International Journal of Cancer* 126:2049-2066.
23. Gabriely, G., Yi, M., Narayan, R.S., Niers, J.M., Wurdinger, T., Imitola, J., Ligon, K.L., Kesari, S., Esau, C., Stephens, R.M., et al. 2011. Human Glioma Growth Is Controlled by MicroRNA-10b. *Cancer Research* 71:3563-3572.
24. Gong, Y., Somwar, R., Politi, K., Balak, M., Chmielecki, J., Jiang, X., and Pao, W. 2007. Induction of BIM Is Essential for Apoptosis Triggered by EGFR Kinase Inhibitors in Mutant EGFR-Dependent Lung Adenocarcinomas. *PLoS Med* 4:e294.
25. Ray, B.N., Lee, N.Y., How, T., and Blobe, G.C. 2010. ALK5 phosphorylation of the endoglin cytoplasmic domain regulates Smad1/5/8 signaling and endothelial cell migration. *Carcinogenesis* 31:435-441.
26. Su, D., Peng, X., Zhu, S., Huang, Y., Dong, Z., Zhang, Y., Zhang, J., Liang, Q., Lu, J., and Huang, B. 2010. Role of p38 MAPK pathway in BMP4-mediated Smad-dependent premature senescence in lung cancer cells. *Biochemical Journal* 433:333-343.
27. Bakkebo, M., Huse, K., Hilden, V., Smeland, E., and Oksvold, M. 2010. TGF-beta-induced growth inhibition in B-cell lymphoma correlates with Smad1/5 signalling and constitutively active p38 MAPK. *BMC Immunology* 11:57.
28. Eyholzer, M., Schmid, S., Wilkens, L., Mueller, B.U., and Pabst, T. 2010. The tumour-suppressive miR-29a/b1 cluster is regulated by CEBPA and blocked in human AML. *Br J Cancer* 103:275-284.
29. Teichler, S., Illmer, T., Roemhild, J., Ovcharenko, D., Stiewe, T., and Neubauer, A. 2011. MicroRNA29a regulates the expression of the nuclear oncogene Ski. *Blood*.
30. Sarkar, S., Dey, B.K., and Dutta, A. 2010. MiR-322/424 and -503 Are Induced during Muscle Differentiation and Promote Cell Cycle Quiescence and Differentiation by Down-Regulation of Cdc25A. *Mol. Biol. Cell* 21:2138-2149.
31. Zhou, J., and Wang, W. 2011. Analysis of microRNA expression profiling identifies microRNA-503 regulates metastatic function in hepatocellular cancer cell. *Journal of Surgical Oncology*.
32. Lee, K.H., Chen, Y.L., Yeh, S.D., Hsiao, M., Lin, J.T., Goan, Y.G., and Lu, P.J. 2009. MicroRNA-330 acts as tumor suppressor and induces apoptosis of prostate cancer cells through E2F1-mediated suppression of Akt phosphorylation. *Oncogene* 28:3360-3370.



33. Liu, X., Jiang, L., Wang, A., Yu, J., Shi, F., and Zhou, X. 2009. MicroRNA-138 suppresses invasion and promotes apoptosis in head and neck squamous cell carcinoma cell lines. *Cancer Letters* 286:217-222.
34. Jiang, L., Liu, X., Kolokythas, A., Yu, J., Wang, A., Heidbreder, C.E., Shi, F., and Zhou, X. 2010. Downregulation of the Rho GTPase signaling pathway is involved in the microRNA-138-mediated inhibition of cell migration and invasion in tongue squamous cell carcinoma. *International Journal of Cancer* 127:505-512.
35. Huang, V., Place, R.F., Portnoy, V., Wang, J., Qi, Z., Jia, Z., Yu, A., Shuman, M., Yu, J., and Li, L.-C. 2011. Upregulation of Cyclin B1 by miRNA and its implications in cancer. *Nucleic Acids Research*.
36. Martin, J., Jenkins, R.H., Bennagi, R., Krupa, A., Phillips, A.O., Bowen, T., and Fraser, D.J. 2011. Post-Transcriptional Regulation of Transforming Growth Factor Beta-1 by MicroRNA-744. *PLoS One* 6:e25044.
37. Buechner, J., Tomte, E., Haug, B.H., Henriksen, J.R., Lokke, C., Flagstad, T., and Einvik, C. 2011. Tumour-suppressor microRNAs let-7 and mir-101 target the proto-oncogene MYCN and inhibit cell proliferation in MYCN-amplified neuroblastoma. *Br J Cancer*.
38. Ory, B., and Ellisen, L.W. 2011. *A microRNA-dependent circuit controlling p63/p73 homeostasis: p53 family cross-talk meets therapeutic opportunity*.
39. Ferretti, E., De Smaele, E., Miele, E., Laneve, P., Po, A., Pelloni, M., Paganelli, A., Di Marcotullio, L., Caffarelli, E., Screpanti, I., et al. 2008. Concerted microRNA control of Hedgehog signalling in cerebellar neuronal progenitor and tumour cells. *EMBO J* 27:2616-2627.
40. Xiong, Y., Zhang, L., Holloway, A.K., Wu, X., Su, L., and Kebebew, E. 2011. MiR-886-3p Regulates Cell Proliferation and Migration, and Is Dysregulated in Familial Non-Medullary Thyroid Cancer. *PLoS One* 6:e24717.
41. Hisaoka, M., Matsuyama, A., Nagao, Y., Luan, L., Kuroda, T., Akiyama, H., Kondo, S., and Hashimoto, H. 2011. Identification of altered MicroRNA expression patterns in synovial sarcoma. *Genes, Chromosomes and Cancer* 50:137-145.
42. Wu, W., Lin, Z., Zhuang, Z., and Liang, X. 2009. Expression profile of mammalian microRNAs in endometrioid adenocarcinoma. *Eur J Cancer Prev* 18:50-55.
43. Yang, Y., Li, X., Yang, Q., Wang, X., Zhou, Y., Jiang, T., Ma, Q., and Wang, Y.-J. 2010. The role of microRNA in human lung squamous cell carcinoma. *Cancer Genetics and Cytogenetics* 200:127-133.
44. Gao, W., Shen, H., Liu, L., Xu, J., Xu, J., and Shu, Y. 2011. MiR-21 overexpression in human primary squamous cell lung carcinoma is associated with poor patient prognosis. *Journal of Cancer Research and Clinical Oncology* 137:557-566.
45. Song, G., Sharma, A.D., Roll, G.R., Ng, R., Lee, A.Y., Blemloch, R.H., Frandsen, N.M., and Willenbring, H. 2010. MicroRNAs control hepatocyte proliferation during liver regeneration. *Hepatology* 51:1735-1743.
46. Glud, M., Manfé, V., Biskup, E., Holst, L., Dirksen, A.M.A., Hastrup, N., Nielsen, F.C., Drzewiecki, K.T., and Gniadecki, R. 2011. MicroRNA miR-125b induces senescence in human melanoma cells. *Melanoma Research* 21:253-256  
210.1097/CMR.1090b1013e328345333b.
47. Alpini, G., Glaser, S.S., Zhang, J.-P., Francis, H., Han, Y., Gong, J., Stokes, A., Francis, T., Hughart, N., Hubble, L., et al. Regulation of placenta growth factor by microRNA-125b in hepatocellular cancer. *Journal of Hepatology* In Press, Accepted Manuscript.
48. Chen, J., Zhang, X., Lentz, C., Abi-Daoud, M., Paré, G.C., Yang, X., Feilotter, H.E., and Tron, V.A. 2011. miR-193b Regulates Mcl-1 in Melanoma. *The American Journal of Pathology* 179:2162-2168.
49. Fischer, L., Hummel, M., Korfel, A., Lenze, D., Joehrens, K., and Thiel, E. 2011. Differential micro-RNA expression in primary CNS and nodal diffuse large B-cell lymphomas. *Neuro-Oncology* 13:1090-1098.

50. Shao, M., Rossi, S., Chelladurai, B., Shimizu, M., Ntukogu, O., Ivan, M., Calin, G.A., and Matei, D. 2011. PDGF induced microRNA alterations in cancer cells. *Nucleic Acids Research* 39:4035-4047.
51. Li, Y., VandenBoom, T.G., Kong, D., Wang, Z., Ali, S., Philip, P.A., and Sarkar, F.H. 2009. Up-regulation of miR-200 and let-7 by Natural Agents Leads to the Reversal of Epithelial-to-Mesenchymal Transition in Gemcitabine-Resistant Pancreatic Cancer Cells. *Cancer Research* 69:6704-6712.
52. Guled, M., Lahti, L., Lindholm, P.M., Salmenkivi, K., Bagwan, I., Nicholson, A.G., and Knuutila, S. 2009. CDKN2A, NF2, and JUN are dysregulated among other genes by miRNAs in malignant mesothelioma-A miRNA microarray analysis. *Genes, Chromosomes and Cancer* 48:615-623.
53. Ujifuku, K., Mitsutake, N., Takakura, S., Matsuse, M., Saenko, V., Suzuki, K., Hayashi, K., Matsuo, T., Kamada, K., Nagata, I., et al. 2010. miR-195, miR-455-3p and miR-10a are implicated in acquired temozolomide resistance in glioblastoma multiforme cells. *Cancer Letters* 296:241-248.
54. Duan, H., Jiang, Y., Zhang, H., and Wu, Y. 2010. MiR-320 and miR-494 affect cell cycles of primary murine bronchial epithelial cells exposed to benzopyrene. *Toxicology in Vitro* 24:928-935.
55. Guidi, M., Muinos-Gimeno, M., Kagerbauer, B., Marti, E., Estivill, X., and Espinosa-Parrilla, Y. 2010. Overexpression of miR-128 specifically inhibits the truncated isoform of NTRK3 and upregulates BCL2 in SH-SY5Y neuroblastoma cells. *BMC Molecular Biology* 11:95.
56. Cortez, M.A., Nicoloso, M.S., Shimizu, M., Rossi, S., Gopisetty, G., Molina, J.R., Carlotti, C., Tirapelli, D., Neder, L., Brassesco, M.S., et al. 2010. miR-29b and miR-125 regulate podoplanin and suppress invasion in glioblastoma. *Genes, Chromosomes and Cancer* 49:981-990.
57. Nishida, N., Mimori, K., Fabbri, M., Yokobori, T., Sudo, T., Tanaka, F., Shibata, K., Ishii, H., Doki, Y., and Mori, M. 2011. MicroRNA-125a-5p Is an Independent Prognostic Factor in Gastric Cancer and Inhibits the Proliferation of Human Gastric Cancer Cells in Combination with Trastuzumab. *Clinical Cancer Research* 17:2725-2733.
58. Schaar, D.G., Medina, D.J., Moore, D.F., Strair, R.K., and Ting, Y. 2009. miR-320 targets transferrin receptor 1 (CD71) and inhibits cell proliferation. *Experimental Hematology* 37:245-255.
59. Finnerty, J.R., Wang, W.-X., Hébert, S.S., Wilfred, B.R., Mao, G., and Nelson, P.T. 2010. The miR-15/107 Group of MicroRNA Genes: Evolutionary Biology, Cellular Functions, and Roles in Human Diseases. *Journal of Molecular Biology* 402:491-509.
60. Aqeilan, R.I., Calin, G.A., and Croce, C.M. 2009. miR-15a and miR-16-1 in cancer: discovery, function and future perspectives. *Cell Death Differ* 17:215-220.
61. Wang, C., Bian, Z., Wei, D., and Zhang, J.-g. 2011. miR-29b regulates migration of human breast cancer cells. *Molecular and Cellular Biochemistry* 352:197-207.
62. Yoon, S., Choi, Y. C., Lee, S., Jeong, Y., Yoon, J., and Baek, K. 2010. Induction of growth arrest by miR-542-3p that targets survivin. *FEBS Letters* 584:4048-4052.
63. Bray, I., Tivnan, A., Bryan, K., Foley, N.H., Watters, K.M., Tracey, L., Davidoff, A.M., and Stallings, R.L. 2011. MicroRNA-542-5p as a novel tumor suppressor in neuroblastoma. *Cancer Letters* 303:56-64.
64. Saito, Y., Suzuki, H., Tsugawa, H., Nakagawa, I., Matsuzaki, J., Kanai, Y., and Hibi, T. 2009. Chromatin remodeling at Alu repeats by epigenetic treatment activates silenced microRNA-512-5p with downregulation of Mcl-1 in human gastric cancer cells. *Oncogene* 28:2738-2744.
65. Schulte, J.H., Marschall, T., Martin, M., Rosenstiel, P., Mestdagh, P., Schlierf, S., Thor, T., Vandesompele, J., Eggert, A., Schreiber, S., et al. 2010. Deep sequencing reveals differential expression of microRNAs in favorable versus unfavorable neuroblastoma. *Nucleic Acids Research* 38:5919-5928.

66. Zhu, H., Wu, H., Liu, X., Li, B., Chen, Y., Ren, X., Liu, C.-G., and Yang, J.-M. 2009. Regulation of autophagy by a Beclin 1-targeted microRNA, miR-30a, in cancer cells. *Autophagy* 5:816-823.
67. Kumarswamy, R., Mudduluru, G., Ceppi, P., Muppala, S., Kozlowski, M., Niklinski, J., Papotti, M., and Allgayer, H. 2011. MicroRNA-30a inhibits epithelial-to-mesenchymal transition by targeting snail and is downregulated in non-small cell lung cancer. *International Journal of Cancer*.
68. Hagman, Z., Larne, O., Edsjö, A., Bjartell, A., Ehrnström, R.A., Ulmert, D., Lilja, H., and Ceder, Y. 2010. miR-34c is downregulated in prostate cancer and exerts tumor suppressive functions. *International Journal of Cancer* 127:2768-2776.
69. López, J.A., and Alvarez-Salas, L.M. 2011. Differential effects of miR-34c-3p and miR-34c-5p on SiHa cells proliferation apoptosis, migration and invasion. *Biochemical and Biophysical Research Communications* 409:513-519.
70. Imam, J.S., Buddavarapu, K., Lee-Chang, J.S., Ganapathy, S., Camosy, C., Chen, Y., and Rao, M.K. 2010. MicroRNA-185 suppresses tumor growth and progression by targeting the Six1 oncogene in human cancers. *Oncogene* 29:4971-4979.
71. Liu, M., Lang, N., Chen, X., Tang, Q., Liu, S., Huang, J., Zheng, Y., and Bi, F. 2011. miR-185 targets RhoA and Cdc42 expression and inhibits the proliferation potential of human colorectal cells. *Cancer Letters* 301:151-160.
72. Boyle, G.M., Woods, S.L., Bonazzi, V.F., Stark, M.S., Hacker, E., Aoude, L.G., Dutton-Regester, K., Cook, A.L., Sturm, R.A., and Hayward, N.K. 2011. Melanoma cell invasiveness is regulated by miR-211 suppression of the BRN2 transcription factor. *Pigment Cell & Melanoma Research* 24:525-537.
73. Levy, C., Khaled, M., Iliopoulos, D., Janas, M.M., Schubert, S., Pinner, S., Chen, P.-H., Li, S., Fletcher, A.L., Yokoyama, S., et al. 2010. Intronic miR-211 Assumes the Tumor Suppressive Function of Its Host Gene in Melanoma. *Molecular Cell* 40:841-849.
74. Nakano, H., Miyazawa, T., Kinoshita, K., Yamada, Y., and Yoshida, T. 2010. Functional screening identifies a microRNA, miR-491 that induces apoptosis by targeting Bcl-XL in colorectal cancer cells. *International Journal of Cancer* 127:1072-1080.
75. Weber, F., Teresi, R.E., Broelsch, C.E., Frilling, A., and Eng, C. 2006. A Limited Set of Human MicroRNA Is Deregulated in Follicular Thyroid Carcinoma. *Journal of Clinical Endocrinology & Metabolism* 91:3584-3591.
76. Guo, X., Guo, L., Ji, J., Zhang, J., Zhang, J., Chen, X., Cai, Q., Li, J., Gu, Q., Liu, B., et al. 2010. miRNA-331-3p directly targets E2F1 and induces growth arrest in human gastric cancer. *Biochemical and Biophysical Research Communications* 398:1-6.
77. Oliveras-Ferreros, C., Cufí, S., Vazquez-Martin, A., Torres-Garcia, V.Z., Del Barco, S., Martin-Castillo, B., and Menendez, J.A. 2011. Micro(mi)RNA expression profile of breast cancer epithelial cells treated with the anti-diabetic drug metformin: Induction of the tumor suppressor miRNA let-7a and suppression of the TGF $\beta$ -induced oncomiR miRNA-181a. *Cell Cycle* 10:1144-1151.
78. Zuo, Z., Calin, G.A., de Paula, H.M., Medeiros, L.J., Fernandez, M.H., Shimizu, M., Garcia-Manero, G., and Bueso-Ramos, C.E. 2011. Circulating microRNAs let-7a and miR-16 predict progression-free survival and overall survival in patients with myelodysplastic syndrome. *Blood*.
79. Hermeking, H. 2009. The miR-34 family in cancer and apoptosis. *Cell Death Differ* 17:193-199.
80. Kaller, M., Liffers, S.-T., Oeljeklaus, S., Kuhlmann, K., Röh, S., Hoffmann, R., Warscheid, B., and Hermeking, H. 2011. Genome-wide characterization of miR-34a induced changes in protein and mRNA expression by a combined pulsed SILAC and micro-array analysis. *Molecular & Cellular Proteomics*.
81. Tsuchiya, N., Izumiya, M., Ogata-Kawata, H., Okamoto, K., Fujiwara, Y., Nakai, M., Okabe, A., Schetter, A.J., Bowman, E.D., Midorikawa, Y., et al. 2011. Tumor

- Suppressor miR-22 Determines p53-Dependent Cellular Fate through Post-transcriptional Regulation of p21. *Cancer Research*.
82. Li, J., Zhang, Y., Zhao, J., Kong, F., and Chen, Y. 2011. Overexpression of miR-22 reverses paclitaxel-induced chemoresistance through activation of PTEN signaling in p53-mutated colon cancer cells. *Molecular and Cellular Biochemistry*:1-8.
  83. Chen, H., Sun, J.g., Cao, X.-w., Ma, X.-g., Xu, J.-p., Luo, F.-k., and Chen, Z.-t. 2009. Preliminary validation of ERBB2 expression regulated by miR-548d-3p and miR-559. *Biochemical and Biophysical Research Communications* 385:596-600.
  84. Jiang, L., Huang, Q., Zhang, S., Zhang, Q., Chang, J., Qiu, X., and Wang, E. 2010. Hsa-miR-125a-3p and hsa-miR-125a-5p are downregulated in non-small cell lung cancer and have inverse effects on invasion and migration of lung cancer cells. *BMC Cancer* 10:318.
  85. Kikkawa, N., Hanazawa, T., Fujimura, L., Nohata, N., Suzuki, H., Chazono, H., Sakurai, D., Horiguchi, S., Okamoto, Y., and Seki, N. 2010. miR-489 is a tumour-suppressive miRNA target PTPN11 in hypopharyngeal squamous cell carcinoma (HSCC). *Br J Cancer* 103:877-884.
  86. Majid, S., Dar, A.A., Saini, S., Chen, Y., Shahryari, V., Liu, J., Zaman, M.S., Hirata, H., Yamamura, S., Ueno, K., et al. 2010. Regulation of Minichromosome Maintenance Gene Family by MicroRNA-1296 and Genistein in Prostate Cancer. *Cancer Research* 70:2809-2818.
  87. Colamaio, M., Borbone, E., Russo, L., Bianco, M., Federico, A., Califano, D., Chiappetta, G., Pallante, P., Troncone, G., Battista, S., et al. 2011. miR-191 Down-Regulation Plays a Role in Thyroid Follicular Tumors through CDK6 Targeting. *Journal of Clinical Endocrinology & Metabolism*.
  88. He, Y., Cui, Y., Wang, W., Gu, J., Guo, S., Ma, K., and Luo, X. 2011. Hypomethylation of the hsa-miR-191 Locus Causes High Expression of hsa-miR-191 and Promotes the Epithelial-to-Mesenchymal Transition in Hepatocellular Carcinoma. *Neoplasia* 13:841-853.
  89. Shi, X., Su, S., Long, J., Mei, B., and Chen, Y. 2011. MicroRNA-191 targets N-deacetylase/N-sulfotransferase 1 and promotes cell growth in human gastric carcinoma cell line MGC803. *Acta Biochimica et Biophysica Sinica* 43:849-856.
  90. Butz, H., Liko, I., Czirjak, S., Igaz, P., Korbonits, M., Racz, K., and Patocs, A. 2011. MicroRNA profile indicates downregulation of the TGFbeta pathway in sporadic non-functioning pituitary adenomas. *Pituitary* 14:112-124.
  91. Tili, E., Michaille, J.-J., Adair, B., Alder, H., Limagne, E., Taccioli, C., Ferracin, M., Delmas, D., Latruffe, N., and Croce, C.M. 2010. Resveratrol decreases the levels of miR-155 by upregulating miR-663, a microRNA targeting JunB and JunD. *Carcinogenesis* 31:1561-1566.
  92. Nohata, N., Hanazawa, T., Kikkawa, N., Sakurai, D., Fujimura, L., Chiyomaru, T., Kawakami, K., Yoshino, H., Enokida, H., Nakagawa, M., et al. 2011. Tumour suppressive microRNA-874 regulates novel cancer networks in maxillary sinus squamous cell carcinoma. *Br J Cancer* 105:833-841.
  93. Lin, J., Huang, S., Wu, S., Ding, J., Zhao, Y., Liang, L., Tian, Q., Zha, R., Zhan, R., and He, X. 2011. MicroRNA-423 promotes cell growth and regulates G1/S transition by targeting p21Cip1/Waf1 in hepatocellular carcinoma. *Carcinogenesis* 32:1641-1647.
  94. Wong, T.-S., Liu, X.-B., Wong, B.Y.-H., Ng, R.W.-M., Yuen, A.P.-W., and Wei, W.I. 2008. Mature miR-184 as Potential Oncogenic microRNA of Squamous Cell Carcinoma of Tongue. *Clinical Cancer Research* 14:2588-2592.
  95. Haug, B.H., Henriksen, J.R., Buchner, J., Geerts, D., Tømte, E., Kogner, P., Martinsson, T., Flægstad, T., Sveinbjørnsson, B., and Einvik, C. 2011. MYCN-regulated miRNA-92 Inhibits Secretion of the Tumor Suppressor DICKKOPF-3 (DKK3) in Neuroblastoma. *Carcinogenesis*.

96. Chen, Z.-l., Zhao, X.-h., Wang, J.-w., Li, B.-z., Wang, Z., Sun, J., Tan, F.-w., Ding, D.-p., Xu, X.-h., Zhou, F., et al. 2011. microRNA-92a Promotes Lymph Node Metastasis of Human Esophageal Squamous Cell Carcinoma via E-Cadherin. *Journal of Biological Chemistry* 286:10725-10734.
97. Gui, J., Tian, Y., Wen, X., Zhang, W., Zhang, P., Gao, J., Run, W., Tian, L., Jia, X., and Gao, Y. 2010. Serum microRNA characterization identifies miR-885-5p as a potential marker for detecting liver pathologies. *Clinical Science* 120:183-193.
98. Poliseno, L., Salmena, L., Riccardi, L., Fornari, A., Song, M.S., Hobbs, R.M., Sportoletti, P., Varmeh, S., Egia, A., Fedele, G., et al. 2010. Identification of the miR-106b~25 MicroRNA Cluster as a Proto-Oncogenic PTEN-Targeting Intron That Cooperates with Its Host Gene MCM7 in Transformation. *Sci. Signal.* 3:ra29-.
99. Li, B., Shi, X.-B., Nori, D., Chao, C.K.S., Chen, A.M., Valicenti, R., and de Vere White, R. 2011. Down-regulation of microRNA 106b is involved in p21-mediated cell cycle arrest in response to radiation in prostate cancer cells. *The Prostate* 71:567-574.
100. Qiang, R., Wang, F., Shi, L.-Y., Liu, M., Chen, S., Wan, H.-Y., Li, Y.-X., Li, X., Gao, S.-Y., Sun, B.-C., et al. 2011. Plexin-B1 is a target of miR-214 in cervical cancer and promotes the growth and invasion of HeLa cells. *The International Journal of Biochemistry & Cell Biology* 43:632-641.
101. Bar-Eli, M. 2011. Searching for the 'melano-miRs': miR-214 drives melanoma metastasis. *EMBO J* 30:1880-1881.
102. Malzkorn, B., Wolter, M., Liesenberg, F., Grzendowski, M., Stühler, K., Meyer, H.E., and Reifenberger, G. 2010. Identification and Functional Characterization of microRNAs Involved in the Malignant Progression of Gliomas. *Brain Pathology* 20:539-550.
103. Girardot, M., Pecquet, C., Boukour, S., Knoops, L., Ferrant, A., Vainchenker, W., Giraudier, S., and Constantinescu, S.N. 2010. miR-28 is a thrombopoietin receptor targeting microRNA detected in a fraction of myeloproliferative neoplasm patient platelets. *Blood* 116:437-445.
104. Afanasyeva, E.A., Mestdagh, P., Kumps, C., Vandesompele, J., Ehemann, V., Theissen, J., Fischer, M., Zapatka, M., Brors, B., Savelyeva, L., et al. 2011. MicroRNA miR-885-5p targets CDK2 and MCM5, activates p53 and inhibits proliferation and survival. *Cell Death Differ* 18:974-984.
105. Liu, L., Jiang, Y., Zhang, H., Greenlee, A.R., and Han, Z. 2010. Overexpressed miR-494 down-regulates PTEN gene expression in cells transformed by anti-benzo(a)pyrene-trans-7,8-dihydrodiol-9,10-epoxide. *Life Sciences* 86:192-198.
106. Schwind, S., Maharry, K., Radmacher, M.D., Mrózek, K., Holland, K.B., Margeson, D., Whitman, S.P., Hickey, C., Becker, H., Metzeler, K.H., et al. 2010. Prognostic Significance of Expression of a Single MicroRNA, miR-181a, in Cytogenetically Normal Acute Myeloid Leukemia: A Cancer and Leukemia Group B Study. *Journal of Clinical Oncology* 28:5257-5264.
107. Shin, K.-H., Bae, S.D., Hong, H.S., Kim, R.H., Kang, M.K., and Park, N.-H. 2011. miR-181a shows tumor suppressive effect against oral squamous cell carcinoma cells by downregulating K-ras. *Biochemical and Biophysical Research Communications* 404:896-902.
108. Li, J., Wang, Y., Yu, W., Chen, J., and Luo, J. 2011. Expression of serum miR-221 in human hepatocellular carcinoma and its prognostic significance. *Biochemical and Biophysical Research Communications* 406:70-73.
109. Zheng, C., Yinghao, S., and Li, J. 2011. MiR-221 expression affects invasion potential of human prostate carcinoma cell lines by targeting DVL2. *Medical Oncology*:1-8.
110. Yamamoto, Y., Kosaka, N., Tanaka, M., Koizumi, F., Kanai, Y., Mizutani, T., Murakami, Y., Kuroda, M., Miyajima, A., Kato, T., et al. 2009. MicroRNA-500 as a potential diagnostic marker for hepatocellular carcinoma. *Biomarkers* 14:529-538.

111. Liu, H., Brannon, A., Reddy, A., Alexe, G., Seiler, M., Arreola, A., Oza, J., Yao, M., Juan, D., Liou, L., et al. 2010. Identifying mRNA targets of microRNA dysregulated in cancer: with application to clear cell Renal Cell Carcinoma. *BMC Systems Biology* 4:51.
112. Chen, Y., and Gorski, D.H. 2008. Regulation of angiogenesis through a microRNA (miR-130a) that down-regulates antiangiogenic homeobox genes GAX and HOXA5. *Blood* 111:1217-1226.
113. Suresh, S., McCallum, L., Lu, W., Lazar, N., Perbal, B., and Irvine, A. 2011. MicroRNAs 130a/b are regulated by BCR-ABL and downregulate expression of CCN3 in CML. *Journal of Cell Communication and Signaling*:1-9.
114. Guo, J., Miao, Y., Xiao, B., Huan, R., Jiang, Z., Meng, D., and Wang, Y. 2009. Differential expression of microRNA species in human gastric cancer versus non-tumorous tissues. *J Gastroenterol Hepatol* 24:652-657.
115. Park, J.-K., Henry, J.C., Jiang, J., Esau, C., Gusev, Y., Lerner, M.R., Postier, R.G., Brackett, D.J., and Schmittgen, T.D. 2011. miR-132 and miR-212 are increased in pancreatic cancer and target the retinoblastoma tumor suppressor. *Biochemical and Biophysical Research Communications* 406:518-523.
116. Tang, J.-T., Wang, J.-L., Du, W., Hong, J., Zhao, S.-L., Wang, Y.-C., Xiong, H., Chen, H.-M., and Fang, J.-Y. 2011. MicroRNA 345, a methylation-sensitive microRNA is involved in cell proliferation and invasion in human colorectal cancer. *Carcinogenesis*.
117. Wang, Q., Li, D.C., Li, Z.F., Liu, C.X., Xiao, Y.M., Zhang, B., Li, X.D., Zhao, J., Chen, L.P., Xing, X.M., et al. 2011. Upregulation of miR-27a contributes to the malignant transformation of human bronchial epithelial cells induced by SV40 small T antigen. *Oncogene*.
118. Lerner, M., Lundgren, J., Akhoondi, S., Jahn, A., Ng, H.-F., Moqadam, F.A., Oude Vrielink, J.A.F., Agami, R., Den Boer, M.L., Grandér, D., et al. 2011. miRNA-27a controls FBW7/hCDC4-dependent cyclin E degradation and cell cycle progression. *Cell Cycle* 10:2172-2183.
119. Ding, J., Huang, S., Wu, S., Zhao, Y., Liang, L., Yan, M., Ge, C., Yao, J., Chen, T., Wan, D., et al. 2010. Gain of miR-151 on chromosome 8q24.3 facilitates tumour cell migration and spreading through downregulating RhoGDIa. *Nat Cell Biol* 12:390-399.
120. Liu, A.M., Zhang, C., Burchard, J., Fan, S.T., Wong, K.F., Dai, H., Poon, R.T., and Luk, J.M. 2011. Global regulation on microRNA in hepatitis B virus-associated hepatocellular carcinoma. *OMICS* 15:187-191.
121. Li, B.H., Zhou, J.S., Ye, F., Cheng, X.D., Zhou, C.Y., Lu, W.G., and Xie, X. 2011. Reduced miR-100 expression in cervical cancer and precursors and its carcinogenic effect through targeting PLK1 protein. *European Journal of Cancer* 47:2166-2174.
122. Lobert, S., Jefferson, B., and Morris, K. 2011. Regulation of  $\beta$ -tubulin isotypes by micro-RNA 100 in MCF7 breast cancer cells. *Cytoskeleton* 68:355-362.
123. Galardi, S., Mercatelli, N., Farace, M.G., and Ciafrè, S.A. 2011. NF- $\kappa$ B and c-Jun induce the expression of the oncogenic miR-221 and miR-222 in prostate carcinoma and glioblastoma cells. *Nucleic Acids Research* 39:3892-3902.
124. Zhang, Y., Ma, T., Yang, S., Xia, M., Xu, J., An, H., Yang, Y., and Li, S. 2011. High-mobility group A1 proteins enhance the expression of the oncogenic miR-222 in lung cancer cells. *Molecular and Cellular Biochemistry*:1-9.
125. Jiang, J., Zheng, X., Xu, X., Zhou, Q., Yan, H., Zhang, X., Lu, B., Wu, C., and Ju, J. 2011. Prognostic Significance of miR-181b and miR-21 in Gastric Cancer Patients Treated with S-1/Oxaliplatin or Doxifluridine/Oxaliplatin. *PLoS One* 6:e23271.
126. Visone, R., Veronese, A., Rassenti, L.Z., Balatti, V., Pearl, D.K., Acunzo, M., Volinia, S., Taccioli, C., Kipps, T.J., and Croce, C.M. 2011. MiR-181b is a biomarker of disease progression in chronic lymphocytic leukemia. *Blood*.

127. Hong, L., Lai, M., Chen, M., Xie, C., Liao, R., Kang, Y.J., Xiao, C., Hu, W.-Y., Han, J., and Sun, P. 2010. The miR-17-92 Cluster of MicroRNAs Confers Tumorigenicity by Inhibiting Oncogene-Induced Senescence. *Cancer Research* 70:8547-8557.
128. Chai, H., Liu, M., Tian, R., Li, X., and Tang, H. 2011. miR-20a targets BNIP2 and contributes chemotherapeutic resistance in colorectal adenocarcinoma SW480 and SW620 cell lines. *Acta Biochimica et Biophysica Sinica* 43:217-225.
129. Gaur, A.B., Holbeck, S.L., Colburn, N.H., and Israel, M.A. 2011. Downregulation of Pdc4 by mir-21 facilitates glioblastoma proliferation in vivo. *Neuro-Oncology* 13:580-590.
130. Moore, L.M., and Zhang, W. 2010. Targeting miR-21 in glioma: a small RNA with big potential. *Expert Opinion on Therapeutic Targets* 14:1247-1257.
131. Landais, S., Landry, S., Legault, P., and Rassart, E. 2007. Oncogenic Potential of the miR-106-363 Cluster and Its Implication in Human T-Cell Leukemia. *Cancer Research* 67:5699-5707.
132. Kogo, R., Mimori, K., Tanaka, F., Komune, S., and Mori, M. 2011. Clinical Significance of miR-146a in Gastric Cancer Cases. *Clinical Cancer Research*.
133. Garcia, A.I., Buisson, M., Bertrand, P., Rimokh, R., Rouleau, E., Lopez, B.S., Lidereau, R., Mikaélian, I., and Mazoyer, S. 2011. Down-regulation of BRCA1 expression by miR-146a and miR-146b-5p in triple negative sporadic breast cancers. *EMBO Molecular Medicine* 3:279-290.
134. Lu, J., He, M.-L., Wang, L., Chen, Y., Liu, X., Dong, Q., Chen, Y.-C., Peng, Y., Yao, K.-T., Kung, H.-F., et al. 2011. MiR-26a Inhibits Cell Growth and Tumorigenesis of Nasopharyngeal Carcinoma through Repression of EZH2. *Cancer Research* 71:225-233.
135. Chen, L., Zheng, J., Zhang, Y., Yang, L., Wang, J., Ni, J., Cui, D., Yu, C., and Cai, Z. 2011. Tumor-specific Expression of MicroRNA-26a Suppresses Human Hepatocellular Carcinoma Growth via Cyclin-dependent and -independent Pathways. *Mol Ther*.
136. Li, J.-H., Xiao, X., Zhang, Y.-N., Wang, Y.-M., Feng, L.-M., Wu, Y.-M., and Zhang, Y.-X. 2011. MicroRNA miR-886-5p inhibits apoptosis by down-regulating Bax expression in human cervical carcinoma cells. *Gynecologic Oncology* 120:145-151.
137. Darimpourain, M., Wang, S., Ittmann, M., and Kwabi-Addo, B. 2011. Transcriptional and post-transcriptional regulation of Sprouty1, a receptor tyrosine kinase inhibitor in prostate cancer. *Prostate Cancer Prostatic Dis* 14:279-285.
138. Pastar, I., Khan, A.A., Stojadinovic, O., Lebrun, E.A., Medina, M.C., Brem, H., Kirsner, R.S., Jimenez, J.J., Leslie, C., and Tomic-Canic, M. 2012. Induction of specific micro Ribonucleic acids (miRNAs) inhibits cutaneous wound healing. *Journal of Biological Chemistry*.
139. Hashimi, S.T., Fulcher, J.A., Chang, M.H., Gov, L., Wang, S., and Lee, B. 2009. MicroRNA profiling identifies miR-34a and miR-21 and their target genes JAG1 and WNT1 in the coordinate regulation of dendritic cell differentiation. *Blood* 114:404-414.
140. Selcuklu, S.D., Donoghue, M.T.A., Kerin, M.J., and Spillane, C. 2012. Regulatory interplay between miR-21, JAG1 and 17beta-estradiol (E2) in breast cancer cells. *Biochemical and Biophysical Research Communications* 423:234-239.
141. Fujita, S., Ito, T., Mizutani, T., Minoguchi, S., Yamamichi, N., Sakurai, K., and Iba, H. 2008. miR-21 Gene Expression Triggered by AP-1 Is Sustained through a Double-Negative Feedback Mechanism. *Journal of Molecular Biology* 378:492-504.
142. Hannafon, B., Sebastiani, P., de las Morenas, A., Lu, J., and Rosenberg, C. 2011. Expression of microRNA and their gene targets are dysregulated in preinvasive breast cancer. *Breast Cancer Research* 13:R24.
143. Yang, S., Banerjee, S., Freitas, A.d., Cui, H., Xie, N., Abraham, E., and Liu, G. 2012. miR-21 regulates chronic hypoxia-induced pulmonary vascular remodeling. *American Journal of Physiology - Lung Cellular and Molecular Physiology* 302:L521-L529.

144. Popko, J., Fernandes, A., Brites, D., and Lanier, L.M. 2009. Automated analysis of NeuronJ tracing data. *Cytometry Part A* 75A:371-376.



# Supplemental Figure 1

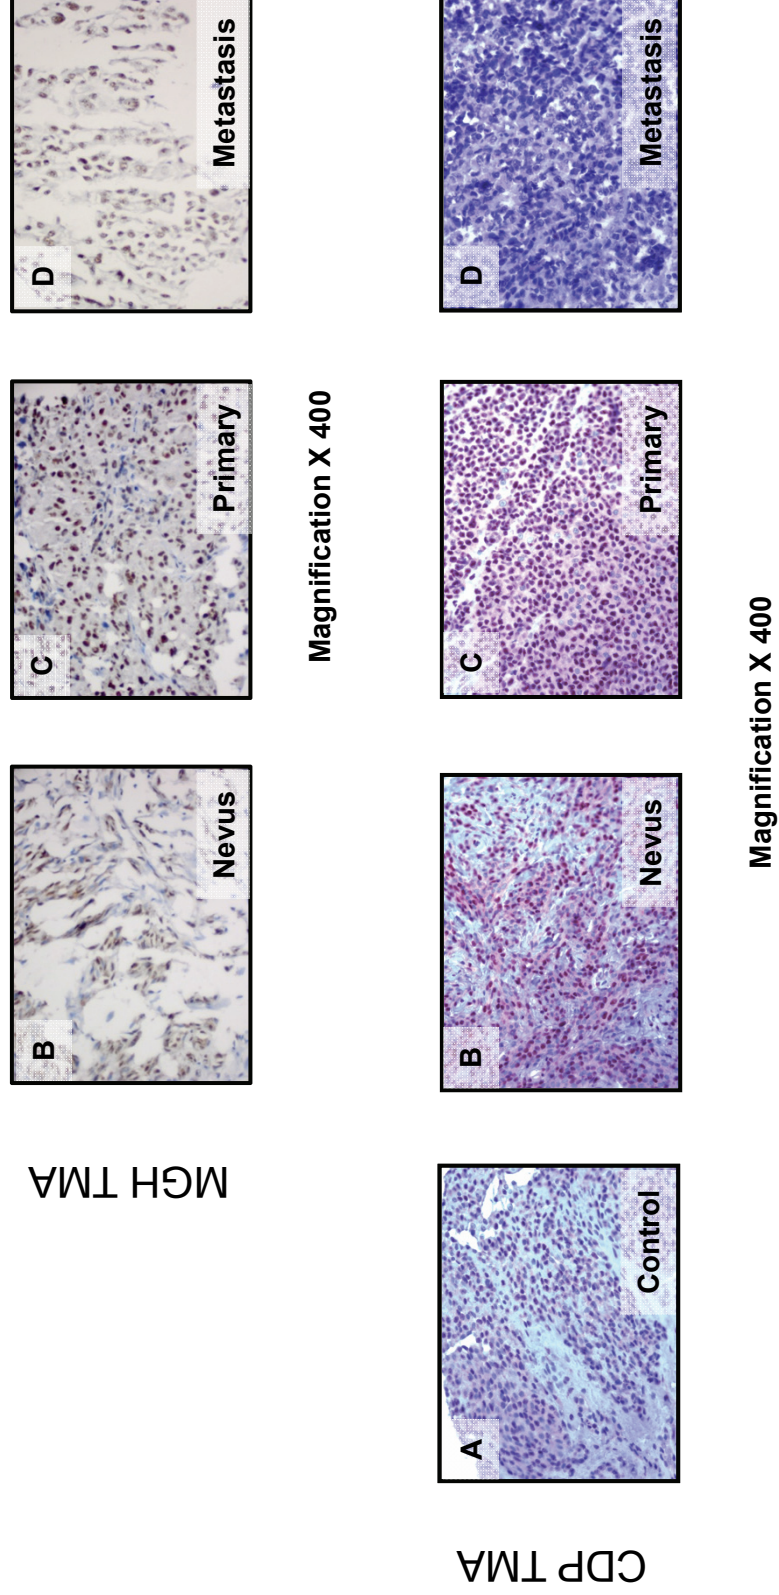

**Supplemental Figure 2**

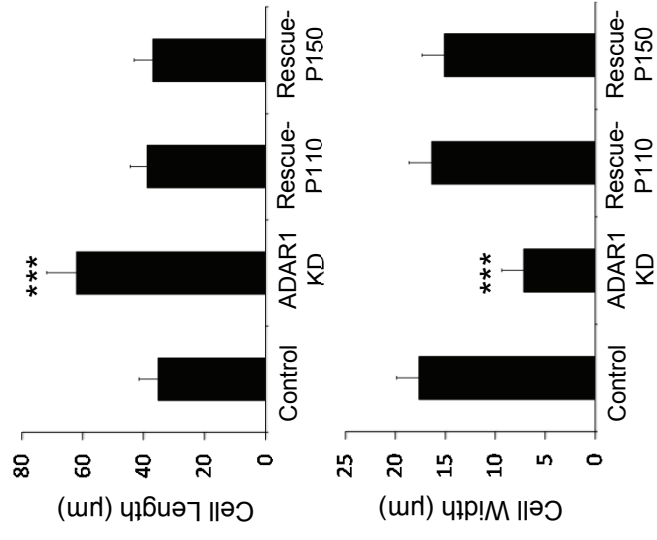

# Supplemental Figure 3

**A**

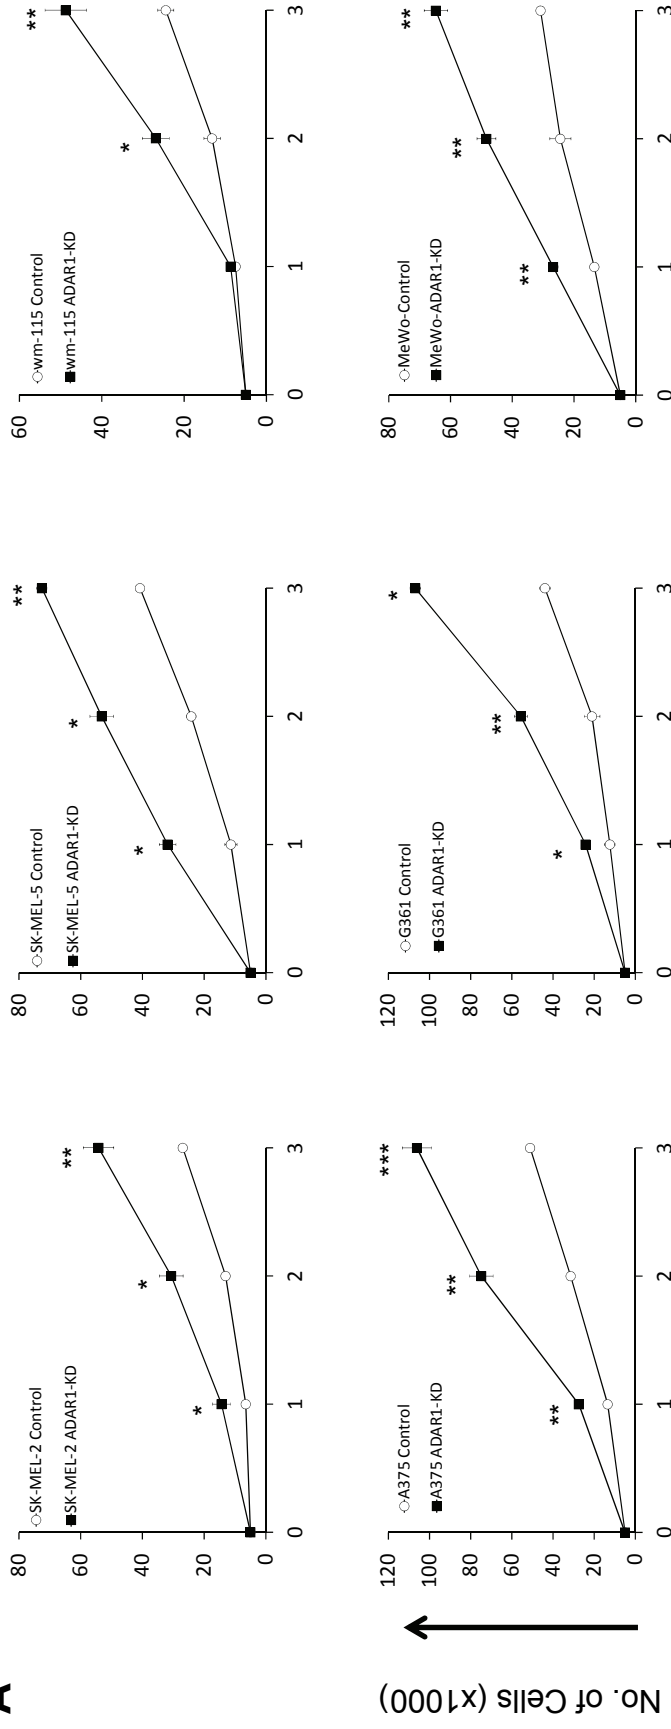

**B**

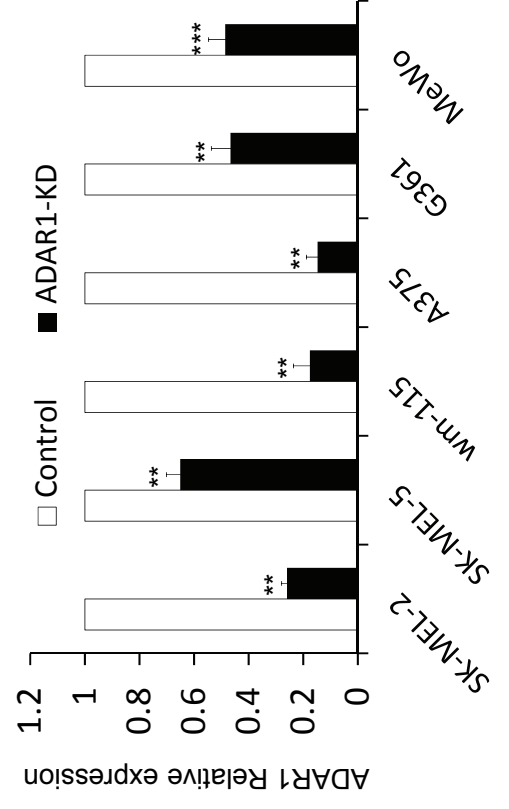

# Supplemental Figure 4

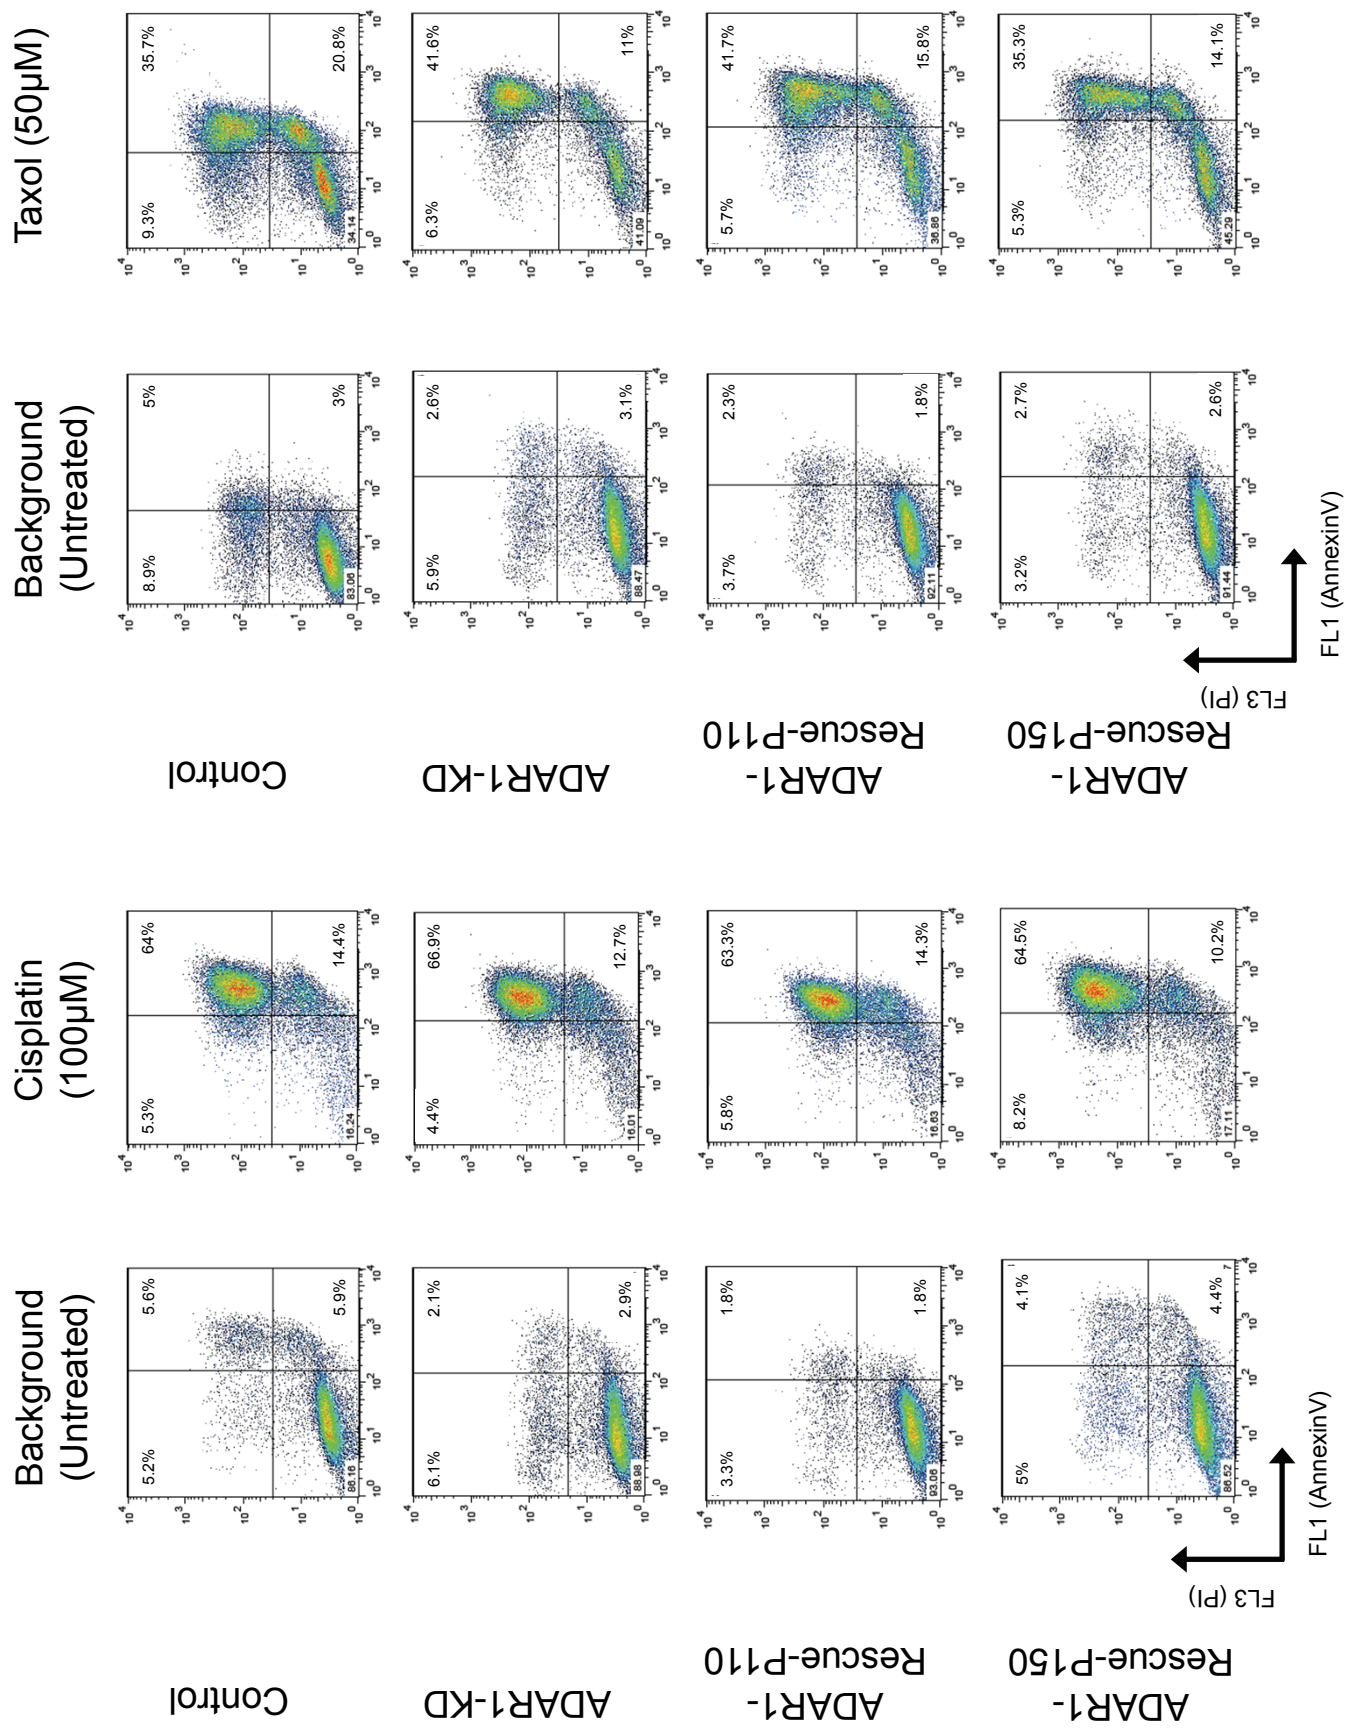

# Supplemental Figure 5

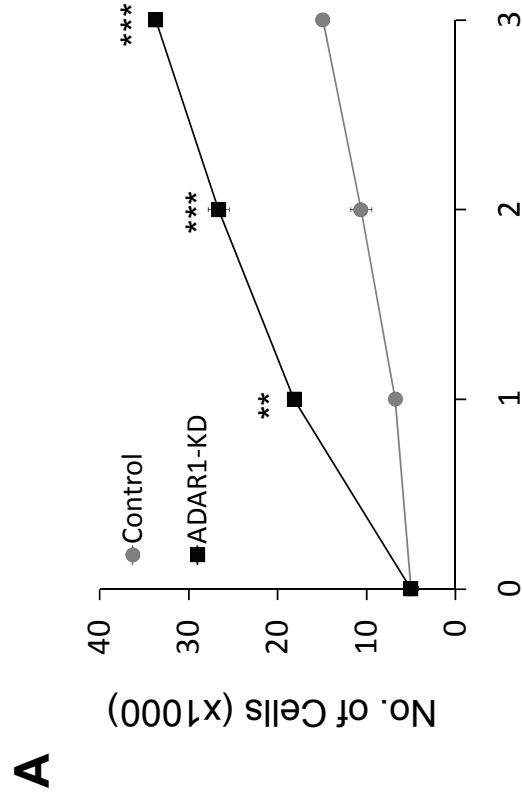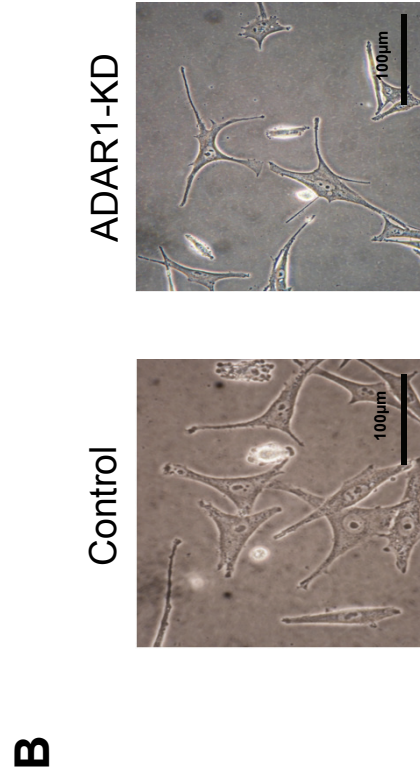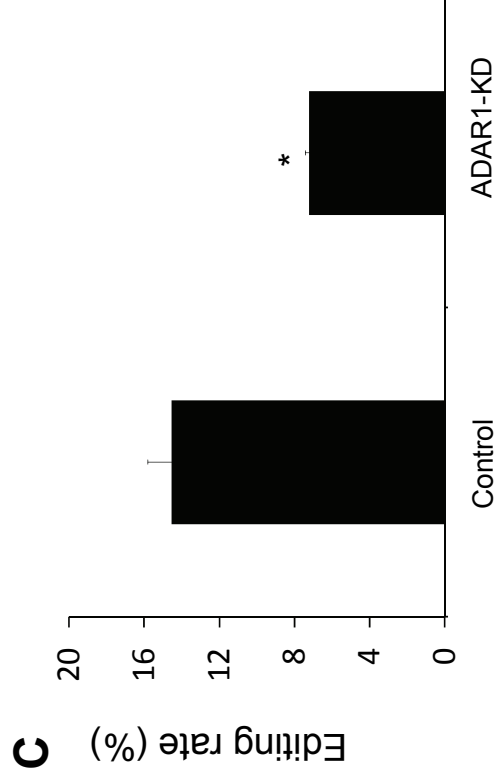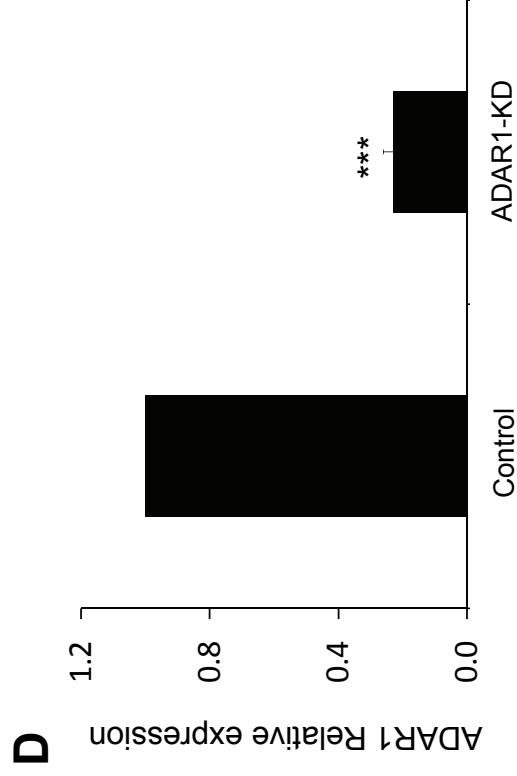

# Supplemental Figure 6

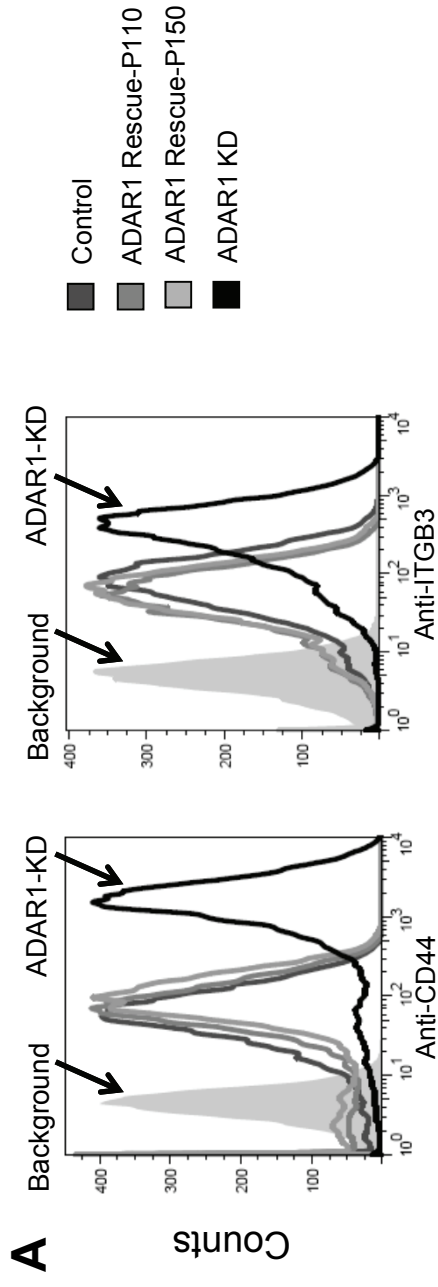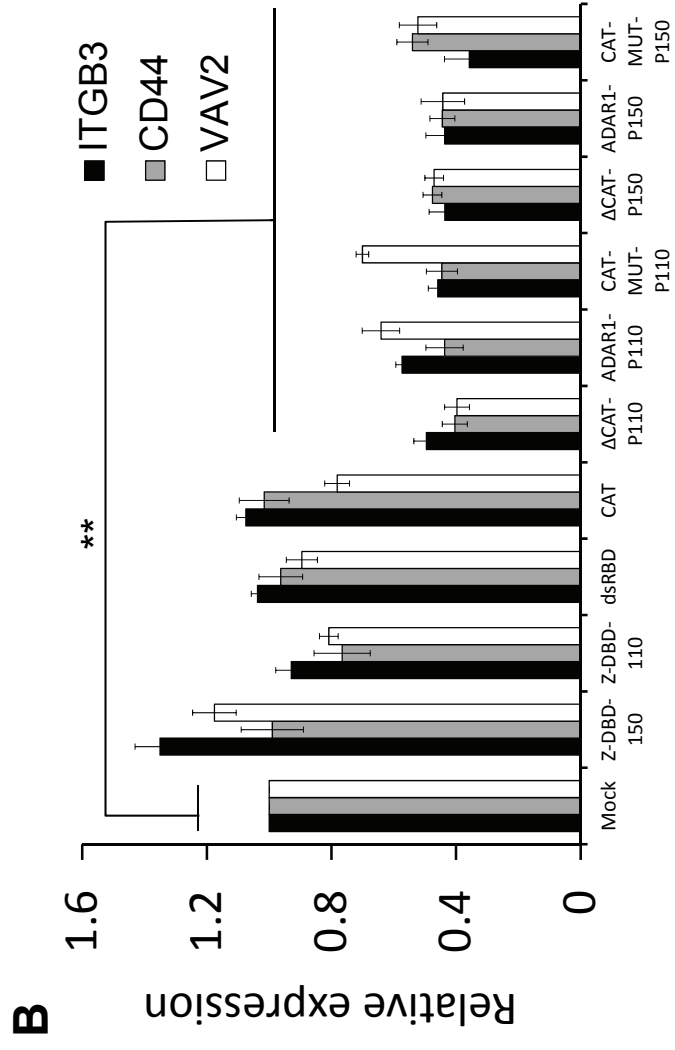

# Supplemental Figure 7

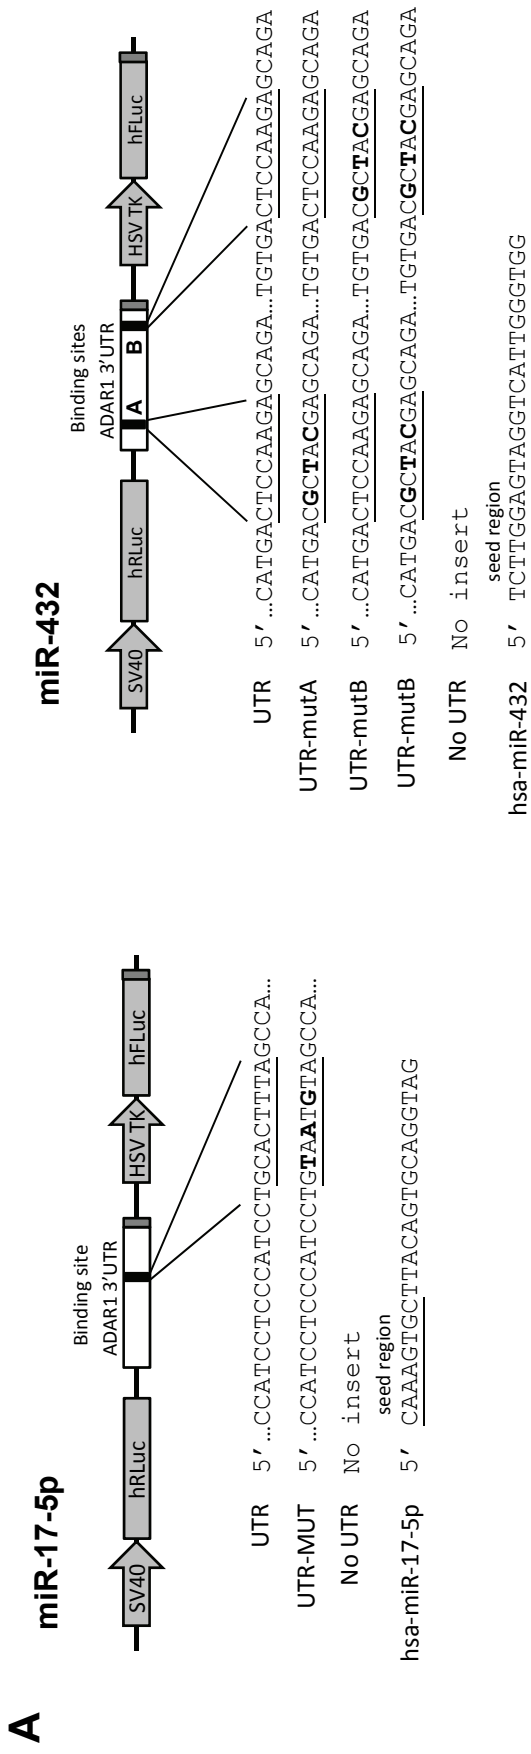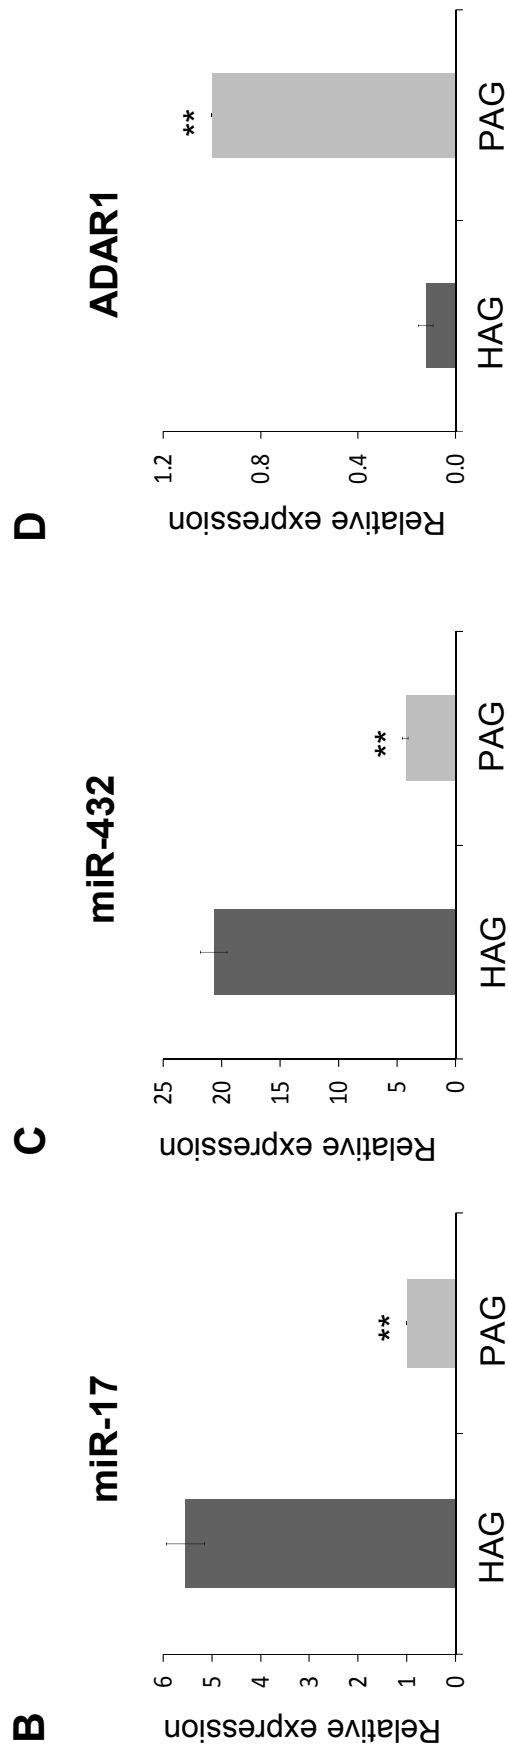

# Supplemental Figure 8

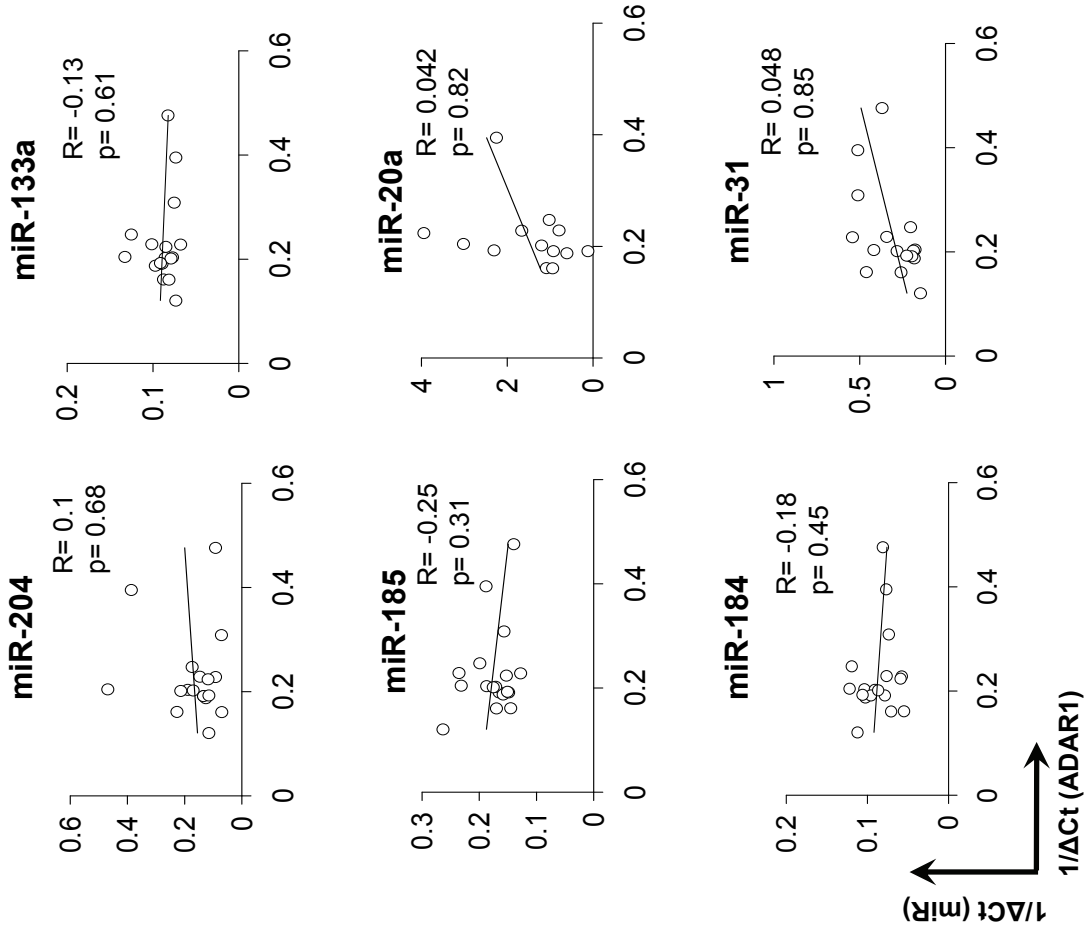



# Supplemental Figure 9

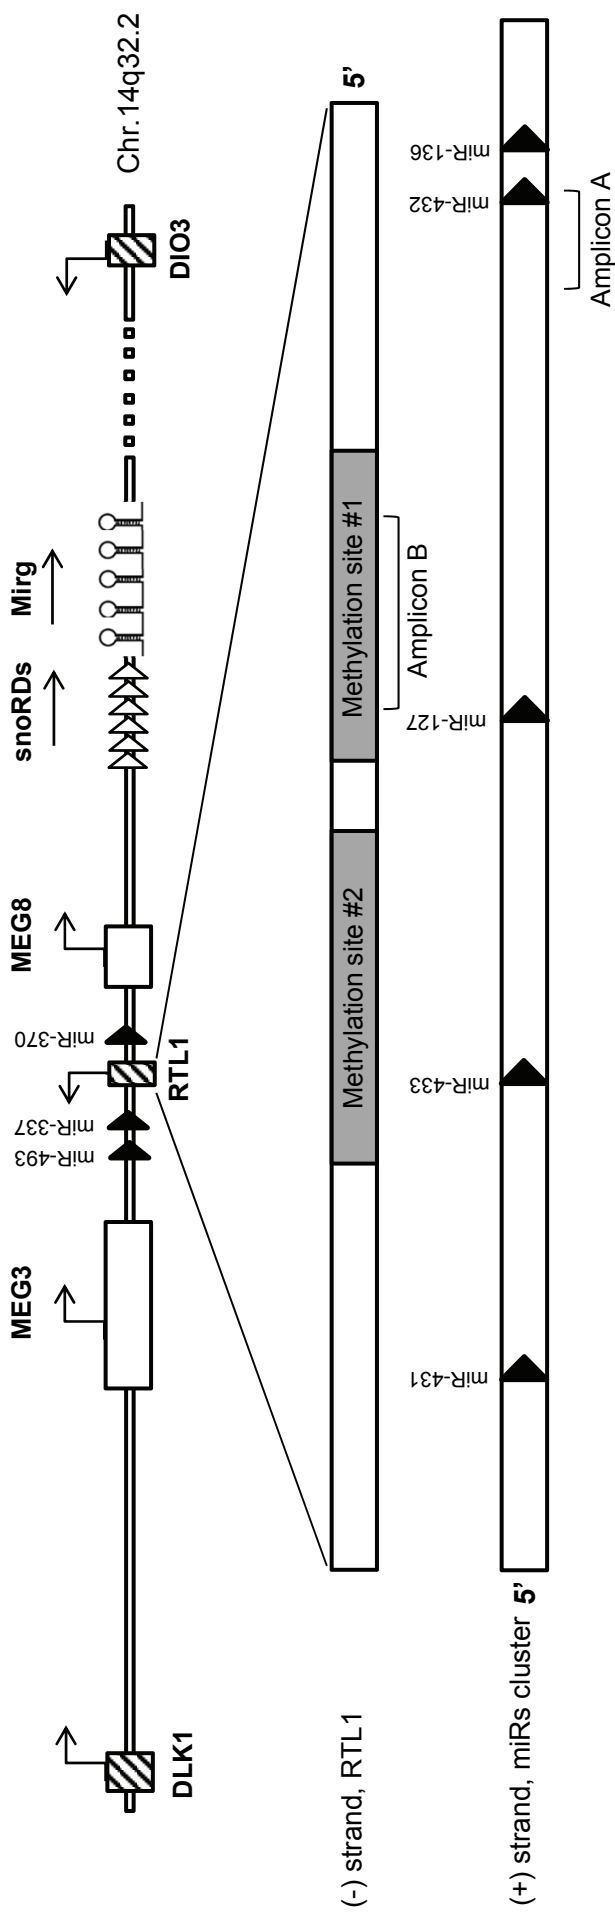

## Amplicon A

TCTCTGTGCTCTTTGAGGTCTTGCATTCGGAAGTACAGCGAGATGA  
 TGGACCTCACCATGGCCATAAGTTCTGCGGTTGAGTGTCTCGGTCTGG  
 TTTTGTCTTTGAGGAGTCTCCCTCCCTTCCCGATTCCCTCAGGTCAGT  
 GTGAGCCCTCTTGTCTTCTCGGGCTCCCGATGGGTTGACTGATGCTT  
 CTTTCATCCTATCAGATGCTCCACTGAGTGGATCCCCCTTGCCTGG  
 TGTGAACCGTTGCATGACTCCTCCAGGTCTTGGAGTAGGTCATTGGG  
TGGATCCCTCT

## Amplicon B

GCGAAGTCCAATCCGGACATCAATCGCGCCACCTCTTCCGTGCTGCTC  
 ATGGTGAGAGTGAACCCCTACCACAGCGTCCGCGGTCCAGGCCCTGGT  
 GGATTCGGGAGCTGACGGCAACTTCAATGGATGAGAAGTTCGCCCAAG  
 AGCACTACGTCGAGCTTACGAGAAGCCGTACCCACAGCCGGTCCAA  
 TCCGTGGACGGCTCGTGAATGGCAACGAGCCCTGTCTGGCTCTACAC  
 GGAGCCCTGGTGTGTATCCACCAGAACCACAGGAGTCCATCCGAAT  
 TTGACATCGTACCTTCAACGGAACCTTCTGTGGTCCCTAGGCATC
